# Supplementary material for: Characteristics and Drivers of High-Altitude Ladybird Flight: Insights from Vertical-Looking Entomological Radar
Source: PLoS One. 2013 Dec 18;8(12):e82278. doi: 10.1371/journal.pone.0082278 (PMC3867359; doi:10.1371/journal.pone.0082278)
Supplement: Data S1 — Raw data file. Final VLR data set filtered for C. septempunctata and H. axyridis like hits. For an explanation of sigma values please see Supplementary Text S1. (XLSX) [file pone.0082278.s015.xlsx]

## Sheet: Sheet1
Year	Month.number	Month	Date	Time	Time.category	mass	sigmaxx	sigmayy	Aerial.Density	Gate.Number	Range	Velocity	Direction	Body.Alignment	sigma.ratio
2000	06	Jun	2000-06-03	09:03:00	09:00-09:59	35.0661	0.150807	0.061424	3.82962	7	598.2	9.47475	317.063	166.303	2.45518
2000	06	Jun	2000-06-03	11:01:00	11:00-11:59	31.1863	0.103445	0.0276106	7.17234	1	172.5	10.6636	317.258	119.892	3.74657
2000	06	Jun	2000-06-03	13:49:00	13:00-13:59	31.248	0.0959857	0.03709	3.55422	3	314.4	11.6518	245.696	61.314	2.58792
2000	06	Jun	2000-06-03	14:01:00	14:00-14:59	26.3761	0.0687004	0.0254737	15.9559	1	172.5	5.62902	256.892	2.09512	2.69691
2000	06	Jun	2000-06-03	14:19:00	14:00-14:59	33.7629	0.122255	0.0322473	22.0694	2	243.45	3.05807	304.531	91.6052	3.79117
2000	06	Jun	2000-06-04	14:49:00	14:00-14:59	33.2405	0.128292	0.0326579	20.3092	1	172.5	4.26087	24.3685	109.054	3.92835
2000	06	Jun	2000-06-04	14:50:00	14:00-14:59	34.3465	0.126672	0.0390077	6.7746	3	314.4	5.69124	24.4202	121	3.24736
2000	06	Jun	2000-06-07	11:34:00	11:00-11:59	26.1474	0.0685162	0.0261342	11.5248	3	314.4	4.97971	95.4431	171.594	2.62171
2000	06	Jun	2000-06-08	09:05:00	09:00-09:59	30.7824	0.0961562	0.0331463	5.40644	1	172.5	13.9939	312.203	53.7711	2.90097
2000	06	Jun	2000-06-08	10:03:00	10:00-10:59	25.5767	0.071837	0.0185869	4.7227	1	172.5	18.9259	257.601	56.2173	3.86493
2000	06	Jun	2000-06-08	10:17:00	10:00-10:59	37.3553	0.152591	0.0407704	2.13005	6	527.25	18.8989	327.512	156.132	3.74269
2000	06	Jun	2000-06-08	11:01:00	11:00-11:59	28.2528	0.0852488	0.0252431	2.87859	3	314.4	15.8097	314.232	69.2706	3.37711
2000	06	Jun	2000-06-08	13:32:00	13:00-13:59	28.1479	0.0850617	0.0233732	3.80944	4	385.35	13.3737	314.944	69.8111	3.63929
2000	06	Jun	2000-06-08	14:02:00	14:00-14:59	34.6029	0.129809	0.0329188	5.55585	7	598.2	6.9178	263.814	5.01084	3.94331
2000	06	Jun	2000-06-12	09:47:00	09:00-09:59	26.9914	0.0720194	0.0254615	9.67261	1	172.5	9.2493	338.114	82.7217	2.82857
2000	06	Jun	2000-06-12	10:47:00	10:00-10:59	33.8614	0.100202	0.0491192	4.02906	6	527.25	10.1765	46.754	52.0361	2.03997
2000	06	Jun	2000-06-15	10:02:00	10:00-10:59	37.6358	0.148208	0.0424132	17.977	1	172.5	4.41044	60.9879	16.7099	3.49439
2000	06	Jun	2000-06-15	10:34:00	10:00-10:59	29.968	0.0997458	0.0253225	8.98983	1	172.5	9.82859	39.1591	82.0921	3.93902
2000	06	Jun	2000-06-15	11:49:00	11:00-11:59	40.9614	0.175502	0.0500954	5.71905	6	527.25	6.85955	136.328	20.4952	3.50334
2000	06	Jun	2000-06-15	12:04:00	12:00-12:59	25.4397	0.0611484	0.0254645	12.4291	1	172.5	7.28956	102.828	179.525	2.40132
2000	06	Jun	2000-06-16	11:02:00	11:00-11:59	37.3798	0.140834	0.0586318	3.94343	5	456.3	11.1762	293.682	19.7544	2.40201
2000	06	Jun	2000-06-17	09:18:00	09:00-09:59	29.3069	0.103527	0.0467491	1.83144	10	811.05	20.0335	300.012	35.4696	2.21453
2000	06	Jun	2000-06-17	10:50:00	10:00-10:59	25.9724	0.0692522	0.0223629	12.1228	1	172.5	6.98549	10.9945	91.3555	3.09674
2000	06	Jun	2000-06-17	12:18:00	12:00-12:59	41.3034	0.197593	0.0545135	3.17557	4	385.35	14.5277	303.884	62.2229	3.62466
2000	06	Jun	2000-06-17	12:19:00	12:00-12:59	39.8248	0.170002	0.0442447	4.50456	5	456.3	8.86577	352.764	110.285	3.84231
2000	06	Jun	2000-06-17	13:34:00	13:00-13:59	29.4608	0.0913012	0.0288178	2.39245	4	385.35	20.6621	1.53362	118.645	3.16822
2000	06	Jun	2000-06-17	13:47:00	13:00-13:59	33.9773	0.136951	0.0544146	1.98065	9	740.1	17.9762	38.0325	75.3924	2.51681
2000	06	Jun	2000-06-17	13:48:00	13:00-13:59	26.9186	0.0717671	0.0424591	3.65843	5	456.3	13.0398	279.31	33.9798	1.69026
2000	06	Jun	2000-06-18	09:49:00	09:00-09:59	27.624	0.0668568	0.0372361	10.1318	2	243.45	6.95714	235.905	53.2404	1.79548
2000	06	Jun	2000-06-18	10:01:00	10:00-10:59	38.4285	0.140503	0.0572591	8.22895	1	172.5	10.4854	293.847	88.737	2.45381
2000	06	Jun	2000-06-18	10:03:00	10:00-10:59	36.1061	0.141377	0.0382504	6.56798	1	172.5	11.2364	325.562	123.994	3.69611
2000	06	Jun	2000-06-18	10:50:00	10:00-10:59	39.1122	0.147278	0.0676991	6.62898	2	243.45	9.85865	331.221	16.4448	2.17548
2000	06	Jun	2000-06-18	12:02:00	12:00-12:59	30.9464	0.0951581	0.031024	7.72862	3	314.4	7.38999	305.534	67.1459	3.06725
2000	06	Jun	2000-06-18	12:46:00	12:00-12:59	35.4902	0.119728	0.0474582	2.10863	5	456.3	15.8361	315.17	17.7663	2.52281
2000	06	Jun	2000-06-18	14:47:00	14:00-14:59	39.1937	0.172011	0.0701529	3.72969	3	314.4	14.5531	261.335	170.555	2.45194
2000	06	Jun	2000-06-19	11:02:00	11:00-11:59	34.8676	0.137977	0.0393755	7.05812	1	172.5	9.38762	341.149	92.2505	3.50414
2000	06	Jun	2000-06-19	11:32:00	11:00-11:59	32.3824	0.110987	0.0301401	5.8009	2	243.45	11.0926	31.5241	90.1739	3.68236
2000	06	Jun	2000-06-19	13:31:00	13:00-13:59	41.4691	0.180085	0.0536607	6.49842	2	243.45	9.67921	39.5371	80.9413	3.35599
2000	06	Jun	2000-06-21	14:50:00	14:00-14:59	27.8982	0.0930358	0.0271214	5.79398	1	172.5	14.6969	62.6054	113.181	3.43035
2000	06	Jun	2000-06-27	09:04:00	09:00-09:59	38.2879	0.151216	0.0501468	14.3325	2	243.45	3.94165	108.878	106.17	3.01546
2000	06	Jun	2000-06-27	09:46:00	09:00-09:59	40.5654	0.163104	0.106756	4.53593	4	385.35	10.5965	144.372	104.795	1.52782
2000	06	Jun	2000-06-27	11:32:00	11:00-11:59	31.9724	0.116108	0.0379401	5.5524	5	456.3	8.05962	49.6947	70.7276	3.06029
2000	06	Jun	2000-06-27	12:03:00	12:00-12:59	38.6534	0.163379	0.0598373	2.95036	8	669.15	10.373	15.8063	64.8685	2.7304
2000	06	Jun	2000-06-27	12:49:00	12:00-12:59	29.8671	0.081348	0.0375116	4.58074	6	527.25	8.93372	269.48	112.934	2.16861
2000	06	Jun	2000-06-28	11:34:00	11:00-11:59	31.2456	0.108116	0.0269575	10.7724	5	456.3	4.20803	215.641	85.3233	4.01059
2000	06	Jun	2000-06-28	11:35:00	11:00-11:59	26.7557	0.0788792	0.0199972	4.91917	5	456.3	7.91567	20.0007	37.6562	3.94451
2000	06	Jun	2000-06-28	11:48:00	11:00-11:59	32.8277	0.116364	0.028904	12.7174	2	243.45	5.29513	153.445	57.5703	4.02586
2000	06	Jun	2000-06-28	12:32:00	12:00-12:59	25.8324	0.0727256	0.0181225	10.8505	4	385.35	4.38669	196.312	5.2537	4.01301
2000	07	Jul	2000-07-02	10:03:00	10:00-10:59	26.6018	0.0765455	0.0198041	7.17129	4	385.35	6.38095	162.523	9.13367	3.86514
2000	07	Jul	2000-07-02	11:16:00	11:00-11:59	41.3547	0.194235	0.0478783	3.32626	1	172.5	20.7002	20.6917	52.1139	4.05684
2000	07	Jul	2000-07-02	11:35:00	11:00-11:59	31.1776	0.113045	0.0354429	3.2969	8	669.15	11.3381	359.078	48.31	3.18949
2000	07	Jul	2000-07-02	12:35:00	12:00-12:59	25.5317	0.0713311	0.0190629	11.4329	1	172.5	7.34283	312.273	104.644	3.74188
2000	07	Jul	2000-07-03	10:04:00	10:00-10:59	25.7755	0.0713869	0.0181519	3.59011	6	527.25	12.393	10.4772	27.2876	3.93274
2000	07	Jul	2000-07-03	12:01:00	12:00-12:59	26.0155	0.0626725	0.0315608	4.72657	4	385.35	10.4002	197.19	12.5283	1.98577
2000	07	Jul	2000-07-03	12:02:00	12:00-12:59	29.2779	0.0926285	0.0271023	14.6281	1	172.5	4.83473	204.909	50.2503	3.41774
2000	07	Jul	2000-07-03	12:02:00	12:00-12:59	36.334	0.13298	0.0420491	4.49867	4	385.35	10.4002	130.551	116.652	3.16249
2000	07	Jul	2000-07-03	12:03:00	12:00-12:59	26.565	0.0785445	0.0222112	5.82282	5	456.3	8.10877	110.297	20.6803	3.53625
2000	07	Jul	2000-07-03	12:32:00	12:00-12:59	33.5364	0.125092	0.0347299	7.11126	1	172.5	9.98495	98.831	101.416	3.60184
2000	07	Jul	2000-07-03	12:33:00	12:00-12:59	37.771	0.164813	0.0521542	6.12643	2	243.45	10.5953	209.011	19.9151	3.16011
2000	07	Jul	2000-07-03	13:32:00	13:00-13:59	38.3183	0.166152	0.0406244	12.29	2	243.45	5.37538	178.214	164.783	4.08997
2000	07	Jul	2000-07-03	14:32:00	14:00-14:59	30.3374	0.0989835	0.025848	11.363	4	385.35	3.95417	223.582	107.547	3.82945
2000	07	Jul	2000-07-03	14:47:00	14:00-14:59	26.0151	0.073579	0.0200518	7.4822	4	385.35	6.38095	296.694	116.625	3.66945
2000	07	Jul	2000-07-06	13:19:00	13:00-13:59	40.7997	0.179652	0.0443688	10.8943	2	243.45	5.63144	57.1094	77.9123	4.04905
2000	07	Jul	2000-07-06	13:35:00	13:00-13:59	29.3099	0.0926915	0.024762	4.73921	2	243.45	13.9806	39.5845	96.2913	3.7433
2000	07	Jul	2000-07-06	13:50:00	13:00-13:59	29.1797	0.0856113	0.0296798	5.95798	2	243.45	11.0926	16.911	15.332	2.8845
2000	07	Jul	2000-07-08	10:47:00	10:00-10:59	25.3558	0.0683899	0.0169482	11.2507	2	243.45	6.22447	47.9115	124.51	4.03522
2000	07	Jul	2000-07-13	14:31:00	14:00-14:59	39.138	0.17736	0.044096	6.82285	1	172.5	11.6178	89.2677	11.608	4.02215
2000	07	Jul	2000-07-15	10:46:00	10:00-10:59	41.6143	0.199452	0.0504004	1.4562	10	811.05	20.0335	157.462	152.264	3.95735
2000	07	Jul	2000-07-15	10:47:00	10:00-10:59	29.5197	0.100643	0.0265966	4.47015	5	456.3	10.2302	68.3144	104.991	3.78406
2000	07	Jul	2000-07-16	14:20:00	14:00-14:59	35.6069	0.145798	0.0396223	3.0876	4	385.35	12.1221	176.383	62.8221	3.67969
2000	07	Jul	2000-07-17	09:31:00	09:00-09:59	35.583	0.148939	0.0395083	5.15225	8	669.15	6.91501	0.835923	168.997	3.7698
2000	07	Jul	2000-07-17	10:18:00	10:00-10:59	25.0094	0.0657392	0.0282313	8.68737	4	385.35	5.97359	146.344	59.8681	2.32859
2000	07	Jul	2000-07-17	10:31:00	10:00-10:59	40.4669	0.138193	0.0810023	4.10863	3	314.4	12.9723	121.58	142.758	1.70603
2000	07	Jul	2000-07-17	10:32:00	10:00-10:59	35.7689	0.132324	0.0477123	6.31257	3	314.4	8.64548	204.219	66.7325	2.77337
2000	07	Jul	2000-07-17	10:33:00	10:00-10:59	25.0539	0.067834	0.0194652	15.4233	1	172.5	5.71437	172.559	12.22	3.48489
2000	07	Jul	2000-07-17	10:46:00	10:00-10:59	33.7237	0.0944048	0.0628192	7.73311	2	243.45	8.79848	246.677	21.5032	1.5028
2000	07	Jul	2000-07-17	10:47:00	10:00-10:59	25.8884	0.0751065	0.0205819	7.48809	1	172.5	10.229	76.241	67.8441	3.64916
2000	07	Jul	2000-07-17	10:49:00	10:00-10:59	29.9286	0.098822	0.0291858	6.17581	1	172.5	10.3131	182.134	34.0661	3.38596
2000	07	Jul	2000-07-17	10:50:00	10:00-10:59	29.6006	0.0973078	0.0303428	7.83969	1	172.5	9.38762	231.087	73.8274	3.20695
2000	07	Jul	2000-07-17	11:01:00	11:00-11:59	28.1391	0.0899666	0.0325972	3.1201	9	740.1	12.2552	253.834	36.4444	2.75995
2000	07	Jul	2000-07-17	11:02:00	11:00-11:59	34.2074	0.116993	0.0391726	4.51108	6	527.25	8.5366	172.436	14.1831	2.9866
2000	07	Jul	2000-07-17	11:04:00	11:00-11:59	28.0212	0.0838511	0.0234498	8.48779	6	527.25	4.74227	206.965	91.7159	3.57577
2000	07	Jul	2000-07-17	11:32:00	11:00-11:59	41.2137	0.180071	0.0552732	5.89127	5	456.3	7.07343	154.871	140.659	3.25783
2000	07	Jul	2000-07-17	11:35:00	11:00-11:59	35.6871	0.122707	0.0645499	5.70011	4	385.35	8.50853	163.237	12.0908	1.90097
2000	07	Jul	2000-07-17	11:35:00	11:00-11:59	36.2276	0.13931	0.0411207	5.90999	8	669.15	6.17094	9.45473	4.05704	3.38783
2000	07	Jul	2000-07-17	11:47:00	11:00-11:59	28.4662	0.0882775	0.0216761	10.9003	1	172.5	7.39689	74.2724	69.704	4.07258
2000	07	Jul	2000-07-17	12:05:00	12:00-12:59	39.762	0.163336	0.0559233	3.82673	3	314.4	11.8529	108.31	130.413	2.92072
2000	07	Jul	2000-07-17	12:34:00	12:00-12:59	29.0628	0.0909165	0.0285056	6.06902	2	243.45	11.0065	136.029	137.889	3.18943
2000	07	Jul	2000-07-17	12:46:00	12:00-12:59	25.3784	0.0723951	0.0195402	6.69707	1	172.5	10.6636	249.032	77.7521	3.70494
2000	07	Jul	2000-07-17	13:03:00	13:00-13:59	26.4273	0.0790368	0.0211825	5.57582	5	456.3	8.41677	123.796	158.309	3.73124
2000	07	Jul	2000-07-17	13:48:00	13:00-13:59	37.6718	0.148409	0.0423118	10.443	4	385.35	4.06879	221.823	78.1187	3.50752
2000	07	Jul	2000-07-17	13:48:00	13:00-13:59	29.5087	0.0975318	0.0251781	5.40746	5	456.3	7.91567	185.879	45.4012	3.87367
2000	07	Jul	2000-07-17	14:01:00	14:00-14:59	28.2388	0.0864951	0.035815	4.88748	4	385.35	9.51841	180.382	39.6217	2.41505
2000	07	Jul	2000-07-17	14:19:00	14:00-14:59	41.5102	0.163543	0.0873891	6.09142	3	314.4	8.9847	174.667	22.2077	1.87144
2000	07	Jul	2000-07-17	14:32:00	14:00-14:59	41.3705	0.18815	0.0509335	3.89588	3	314.4	12.2766	146.229	170.966	3.69403
2000	07	Jul	2000-07-18	09:31:00	09:00-09:59	26.6991	0.0760655	0.0306084	5.97313	6	527.25	7.38728	147.583	23.2379	2.48512
2000	07	Jul	2000-07-18	09:46:00	09:00-09:59	33.0915	0.108141	0.0525958	7.7793	2	243.45	8.44904	177.315	35.1684	2.05608
2000	07	Jul	2000-07-18	09:50:00	09:00-09:59	26.4954	0.0696425	0.0255739	15.2587	2	243.45	4.51921	144.54	3.0292	2.72319
2000	07	Jul	2000-07-18	10:17:00	10:00-10:59	31.3135	0.107555	0.0414477	4.296	4	385.35	11.6202	165.647	179.002	2.59496
2000	07	Jul	2000-07-18	10:19:00	10:00-10:59	38.4244	0.143694	0.0527426	8.48481	1	172.5	9.90615	158.658	11.514	2.72444
2000	07	Jul	2000-07-18	10:31:00	10:00-10:59	30.3591	0.101036	0.0278218	4.42111	5	456.3	10.0751	211.693	19.2377	3.63154
2000	07	Jul	2000-07-18	10:35:00	10:00-10:59	32.1499	0.117553	0.0340588	4.4854	5	456.3	9.92469	152.673	138.224	3.45149
2000	07	Jul	2000-07-18	10:49:00	10:00-10:59	38.9356	0.168816	0.043479	4.58353	3	314.4	9.16449	211.53	61.0353	3.8827
2000	07	Jul	2000-07-18	11:02:00	11:00-11:59	40.6436	0.173079	0.0674814	8.89174	1	172.5	8.3846	108.675	75.8776	2.56483
2000	07	Jul	2000-07-18	11:17:00	11:00-11:59	37.8581	0.146779	0.0492465	7.84665	5	456.3	5.54068	198.28	13.094	2.9805
2000	07	Jul	2000-07-18	11:31:00	11:00-11:59	34.8284	0.123145	0.0575706	2.82166	9	740.1	12.8389	196.865	163.034	2.13903
2000	07	Jul	2000-07-18	11:33:00	11:00-11:59	40.2816	0.194874	0.0623849	2.47331	8	669.15	13.9303	105.1	113.899	3.12374
2000	07	Jul	2000-07-18	11:35:00	11:00-11:59	38.9557	0.180115	0.0459268	3.82277	8	669.15	9.19852	60.096	22.1933	3.92179
2000	07	Jul	2000-07-18	13:01:00	13:00-13:59	32.3301	0.124783	0.0464686	4.19852	8	669.15	8.86398	123.952	14.807	2.68532
2000	07	Jul	2000-07-18	13:17:00	13:00-13:59	28.8419	0.0920501	0.0243347	6.67795	3	314.4	7.38999	97.2286	59.941	3.78267
2000	07	Jul	2000-07-18	13:19:00	13:00-13:59	28.074	0.0786372	0.0333403	3.603	4	385.35	14.2812	89.7019	63.97	2.35862
2000	07	Jul	2000-07-18	13:31:00	13:00-13:59	36.6326	0.149014	0.0528714	4.16651	5	456.3	10.555	133.269	173.875	2.81843
2000	07	Jul	2000-07-18	13:35:00	13:00-13:59	25.7525	0.0757114	0.0234855	6.81091	3	314.4	8.4853	117.163	69.1029	3.22374
2000	07	Jul	2000-07-18	14:02:00	14:00-14:59	37.0322	0.149613	0.0484557	4.74821	4	385.35	10.0286	109.183	158.352	3.08761
2000	07	Jul	2000-07-18	14:02:00	14:00-14:59	41.4577	0.187824	0.0792051	3.53922	5	456.3	11.6666	126.523	153.348	2.37137
2000	07	Jul	2000-07-18	14:03:00	14:00-14:59	37.5254	0.152442	0.0428652	7.3242	1	172.5	9.38762	163.141	14.7016	3.55632
2000	07	Jul	2000-07-18	14:05:00	14:00-14:59	29.3616	0.0966919	0.0320427	3.94421	5	456.3	11.2709	132.978	119.949	3.0176
2000	07	Jul	2000-07-18	14:33:00	14:00-14:59	34.4247	0.125371	0.0580774	3.09468	7	598.2	10.6304	177.195	62.4368	2.15869
2000	07	Jul	2000-07-18	14:34:00	14:00-14:59	26.6542	0.0791023	0.029222	6.33627	4	385.35	8.02219	180.817	82.4106	2.70694
2000	07	Jul	2000-07-18	14:35:00	14:00-14:59	38.3462	0.169109	0.0591989	6.11479	5	456.3	6.92605	259.855	69.1471	2.85662
2000	07	Jul	2000-07-18	14:46:00	14:00-14:59	37.3506	0.1797	0.0557044	4.5184	3	314.4	12.061	166.315	169.242	3.22595
2000	07	Jul	2000-07-18	14:46:00	14:00-14:59	32.9278	0.121742	0.0368526	7.93451	4	385.35	6.10347	184.059	75.2554	3.30348
2000	07	Jul	2000-07-19	09:02:00	09:00-09:59	33.1882	0.120665	0.0335022	6.67612	5	456.3	6.64896	126.415	11.8479	3.6017
2000	07	Jul	2000-07-19	09:02:00	09:00-09:59	29.0367	0.0970285	0.0334264	3.43625	5	456.3	12.315	111.896	8.53324	2.90275
2000	07	Jul	2000-07-19	09:18:00	09:00-09:59	26.9645	0.0733182	0.0338521	8.39033	1	172.5	8.3152	70.8257	42.4418	2.16584
2000	07	Jul	2000-07-19	09:35:00	09:00-09:59	40.5991	0.151814	0.0922651	6.71791	7	598.2	5.51664	171.559	52.5924	1.64542
2000	07	Jul	2000-07-19	10:02:00	10:00-10:59	35.1649	0.140515	0.0354609	9.58602	1	172.5	8.3152	109.61	151.253	3.96255
2000	07	Jul	2000-07-19	10:17:00	10:00-10:59	37.617	0.177874	0.0524484	3.18713	10	811.05	9.84828	147.369	166.547	3.39141
2000	07	Jul	2000-07-19	10:18:00	10:00-10:59	36.4056	0.142734	0.0486377	5.38824	6	527.25	7.11364	173.364	6.22006	2.93464
2000	07	Jul	2000-07-19	10:33:00	10:00-10:59	40.8732	0.189676	0.0531504	5.44614	3	314.4	10.0347	130.762	145.363	3.56867
2000	07	Jul	2000-07-19	10:35:00	10:00-10:59	35.9104	0.155318	0.0504367	3.39896	8	669.15	10.1568	144.946	13.4677	3.07946
2000	07	Jul	2000-07-19	10:49:00	10:00-10:59	31.3078	0.113503	0.0354471	3.99302	1	172.5	18.9259	79.9029	110.399	3.20203
2000	07	Jul	2000-07-19	11:01:00	11:00-11:59	25.1234	0.0712001	0.0198602	5.2582	4	385.35	9.20621	74.2523	124.016	3.58507
2000	07	Jul	2000-07-19	11:17:00	11:00-11:59	35.8612	0.137255	0.0444459	3.15567	1	172.5	22.4213	101.564	100.703	3.08814
2000	07	Jul	2000-07-19	11:17:00	11:00-11:59	32.9788	0.108024	0.0412307	9.18227	2	243.45	6.69447	121.498	3.51664	2.62
2000	07	Jul	2000-07-19	11:17:00	11:00-11:59	38.4394	0.14483	0.0717935	4.16911	4	385.35	10.4002	114.179	144.536	2.01731
2000	07	Jul	2000-07-19	11:49:00	11:00-11:59	29.539	0.0730979	0.0474129	4.96219	1	172.5	15.5087	65.5977	39.1146	1.54173
2000	07	Jul	2000-07-19	12:03:00	12:00-12:59	25.1009	0.069331	0.0172587	4.27594	3	314.4	13.003	67.452	172.992	4.01716
2000	07	Jul	2000-07-19	12:03:00	12:00-12:59	34.6932	0.139277	0.036061	4.695	4	385.35	9.51841	106.182	3.51869	3.86228
2000	07	Jul	2000-07-19	12:19:00	12:00-12:59	29.8789	0.104288	0.0323886	2.85984	7	598.2	12.6338	97.9394	176.265	3.21989
2000	07	Jul	2000-07-19	12:20:00	12:00-12:59	36.6723	0.142324	0.0481096	3.011	4	385.35	13.3737	77.9007	106.901	2.95832
2000	07	Jul	2000-07-19	12:32:00	12:00-12:59	29.3892	0.0941125	0.0288273	5.6631	5	456.3	8.10877	68.2779	160.208	3.2647
2000	07	Jul	2000-07-19	13:01:00	13:00-13:59	25.1474	0.0809024	0.0225263	3.85732	6	527.25	10.5251	112.384	148.645	3.59146
2000	07	Jul	2000-07-19	13:47:00	13:00-13:59	34.4324	0.121606	0.0340968	7.40532	4	385.35	6.68486	113.744	153.68	3.56649
2000	07	Jul	2000-07-19	14:19:00	14:00-14:59	27.8908	0.0917555	0.0328723	3.54438	6	527.25	11.6417	127.992	72.4103	2.79127
2000	07	Jul	2000-07-19	14:50:00	14:00-14:59	32.9994	0.119561	0.0362284	4.48445	1	172.5	16.6691	119.402	179.711	3.3002
2000	07	Jul	2000-07-20	09:34:00	09:00-09:59	25.2631	0.0636585	0.0276003	5.73531	5	456.3	8.41677	226.989	175.388	2.30644
2000	07	Jul	2000-07-20	10:19:00	10:00-10:59	35.4476	0.144639	0.0372792	15.8203	2	243.45	4.03125	353.46	68.6847	3.87988
2000	07	Jul	2000-07-20	10:49:00	10:00-10:59	29.5198	0.0959584	0.0364786	3.51547	9	740.1	10.5729	68.5462	36.5369	2.63054
2000	07	Jul	2000-07-20	11:01:00	11:00-11:59	40.4887	0.192364	0.0593639	6.27595	7	598.2	5.84988	350.064	51.3634	3.24042
2000	07	Jul	2000-07-20	11:01:00	11:00-11:59	26.6583	0.0818495	0.029798	5.67063	7	598.2	7.32477	131.101	4.54723	2.74681
2000	07	Jul	2000-07-20	11:04:00	11:00-11:59	36.7478	0.15304	0.0437198	3.70308	7	598.2	9.68533	50.0309	75.8509	3.50048
2000	07	Jul	2000-07-20	11:33:00	11:00-11:59	28.5603	0.0923751	0.029599	4.27341	3	314.4	11.4574	174.719	52.9003	3.12089
2000	07	Jul	2000-07-20	11:33:00	11:00-11:59	30.0907	0.103182	0.0254392	3.16101	9	740.1	11.0045	135.033	23.1973	4.05604
2000	07	Jul	2000-07-20	12:32:00	12:00-12:59	26.2671	0.0792051	0.0227402	4.87657	6	527.25	8.93372	35.1583	48.7898	3.48304
2000	07	Jul	2000-07-20	12:34:00	12:00-12:59	26.4109	0.0685411	0.0313212	9.70772	2	243.45	7.24127	177.709	167.84	2.18833
2000	07	Jul	2000-07-20	12:35:00	12:00-12:59	30.0537	0.107732	0.0392574	2.62622	5	456.3	12.7889	163.772	25.4179	2.74424
2000	07	Jul	2000-07-20	12:49:00	12:00-12:59	40.0358	0.159678	0.0497312	11.779	3	314.4	4.58127	313.315	22.4145	3.21081
2000	07	Jul	2000-07-20	13:47:00	13:00-13:59	34.4693	0.127236	0.0437218	7.63847	3	314.4	7.15897	150.029	28.4115	2.91014
2000	07	Jul	2000-07-20	14:02:00	14:00-14:59	30.4567	0.106771	0.0284211	7.8857	3	314.4	7.04879	193.967	43.6854	3.75674
2000	07	Jul	2000-07-20	14:03:00	14:00-14:59	29.8444	0.0923402	0.0315183	5.26222	5	456.3	8.41677	173.984	55.1075	2.92973
2000	07	Jul	2000-07-20	14:16:00	14:00-14:59	38.6383	0.156521	0.0416907	6.46108	3	314.4	8.4853	115.783	8.03179	3.75434
2000	07	Jul	2000-07-20	14:32:00	14:00-14:59	30.1896	0.0960592	0.0413531	4.47301	6	527.25	9.54423	234.599	170.739	2.3229
2000	07	Jul	2000-07-20	14:32:00	14:00-14:59	30.2583	0.106759	0.0371791	4.3236	7	598.2	8.54572	155.203	163.207	2.87149
2000	07	Jul	2000-07-20	14:35:00	14:00-14:59	37.9025	0.147464	0.0445038	11.8872	2	243.45	5.29513	117.849	1.23876	3.31352
2000	07	Jul	2000-07-20	14:48:00	14:00-14:59	37.6549	0.158458	0.0444917	7.86145	3	314.4	6.94196	232.678	70.0021	3.56152
2000	07	Jul	2000-07-20	14:48:00	14:00-14:59	41.0816	0.162266	0.0800916	6.2758	5	456.3	6.92605	182.188	46.5223	2.026
2000	07	Jul	2000-07-21	09:02:00	09:00-09:59	27.3767	0.0861962	0.0210362	5.71679	5	456.3	8.05962	231.312	22.2832	4.09751
2000	07	Jul	2000-07-21	09:05:00	09:00-09:59	41.8174	0.19111	0.0596221	7.05514	7	598.2	5.21932	14.7408	101.415	3.20535
2000	07	Jul	2000-07-21	09:16:00	09:00-09:59	34.8253	0.127136	0.0491398	7.03443	6	527.25	5.86457	157.388	60.5134	2.58722
2000	07	Jul	2000-07-21	09:17:00	09:00-09:59	34.7193	0.135248	0.0506448	4.97987	5	456.3	8.41677	195.481	52.2612	2.67051
2000	07	Jul	2000-07-21	09:18:00	09:00-09:59	39.2556	0.168247	0.0527225	6.83831	3	314.4	7.51118	211.501	18.3974	3.19119
2000	07	Jul	2000-07-21	09:19:00	09:00-09:59	41.9392	0.204263	0.0660198	2.90787	11	882	10.7098	150.546	22.4899	3.09397
2000	07	Jul	2000-07-21	09:33:00	09:00-09:59	29.1217	0.0945958	0.03326	9.85307	2	243.45	6.95714	264.053	23.1656	2.84413
2000	07	Jul	2000-07-21	09:34:00	09:00-09:59	33.6016	0.135885	0.0338353	8.46542	5	456.3	5.11444	311.484	127.691	4.01608
2000	07	Jul	2000-07-21	09:49:00	09:00-09:59	29.5944	0.0946411	0.0266943	8.70205	3	314.4	6.64004	134.587	64.1373	3.54537
2000	07	Jul	2000-07-21	10:02:00	10:00-10:59	41.4802	0.179662	0.0721507	7.30635	3	314.4	7.51118	210.221	132.342	2.4901
2000	07	Jul	2000-07-21	10:03:00	10:00-10:59	31.3683	0.0969279	0.0493054	6.89642	6	527.25	5.90968	268.175	51.0491	1.96587
2000	07	Jul	2000-07-21	10:05:00	10:00-10:59	25.1402	0.0610657	0.030754	9.45232	4	385.35	5.61512	63.5461	48.0584	1.98562
2000	07	Jul	2000-07-21	10:47:00	10:00-10:59	40.1423	0.173003	0.0792205	6.29527	3	314.4	8.64548	145.158	102.057	2.18381
2000	07	Jul	2000-07-21	10:47:00	10:00-10:59	38.3472	0.169211	0.0446791	5.38101	6	527.25	7.38728	118.062	134.633	3.78726
2000	07	Jul	2000-07-21	11:01:00	11:00-11:59	37.5404	0.160576	0.0417456	7.11917	5	456.3	5.83233	215.667	40.4006	3.84654
2000	07	Jul	2000-07-21	11:03:00	11:00-11:59	33.4753	0.131787	0.0325737	5.0825	5	456.3	8.41677	126.819	133.564	4.0458
2000	07	Jul	2000-07-21	11:03:00	11:00-11:59	27.6459	0.0830621	0.0430286	3.67871	8	669.15	10.5985	112.201	99.3421	1.93039
2000	07	Jul	2000-07-21	11:16:00	11:00-11:59	25.5791	0.083409	0.0205933	3.71297	8	669.15	10.5985	130.584	110.645	4.0503
2000	07	Jul	2000-07-21	11:19:00	11:00-11:59	28.2762	0.0926509	0.0243729	3.34259	6	527.25	11.6417	157.986	132.635	3.80139
2000	07	Jul	2000-07-21	11:32:00	11:00-11:59	37.017	0.128845	0.0599758	7.06766	2	243.45	9.02237	202.307	116.909	2.14828
2000	07	Jul	2000-07-21	11:33:00	11:00-11:59	31.4828	0.113847	0.0310795	6.73145	2	243.45	7.94425	194.251	168.999	3.66309
2000	07	Jul	2000-07-21	11:35:00	11:00-11:59	35.7037	0.147179	0.036705	6.93868	3	314.4	7.63641	219.472	83.9397	4.00978
2000	07	Jul	2000-07-21	11:46:00	11:00-11:59	40.6834	0.177317	0.0640525	3.70676	5	456.3	11.4653	168.873	178.557	2.76831
2000	07	Jul	2000-07-21	11:47:00	11:00-11:59	33.9303	0.131529	0.0430298	7.49184	5	456.3	5.93649	109.145	40.4294	3.05669
2000	07	Jul	2000-07-21	11:49:00	11:00-11:59	38.8359	0.164951	0.0409849	4.7022	3	314.4	11.6518	216.438	112.527	4.02468
2000	07	Jul	2000-07-21	11:50:00	11:00-11:59	25.6232	0.073246	0.0264979	4.6175	3	314.4	12.2766	172.818	55.7986	2.76421
2000	07	Jul	2000-07-21	12:02:00	12:00-12:59	34.4219	0.13585	0.0345096	4.52433	5	456.3	9.77869	145.039	38.0557	3.9366
2000	07	Jul	2000-07-21	13:02:00	13:00-13:59	28.343	0.0908524	0.0222117	5.37541	4	385.35	9.35971	200.221	16.4941	4.09029
2000	07	Jul	2000-07-21	13:16:00	13:00-13:59	28.4016	0.0908217	0.0254609	7.25132	5	456.3	6.3932	189.633	160.208	3.56711
2000	07	Jul	2000-07-21	13:16:00	13:00-13:59	25.0586	0.0700537	0.022308	5.76869	6	527.25	7.38728	168.113	131.841	3.1403
2000	07	Jul	2000-07-21	13:17:00	13:00-13:59	31.219	0.108425	0.0266619	5.34173	2	243.45	12.6799	196.174	111.826	4.06668
2000	07	Jul	2000-07-21	13:17:00	13:00-13:59	26.9481	0.0780623	0.0405251	3.8671	9	740.1	9.80383	155.381	161.306	1.92627
2000	07	Jul	2000-07-21	13:32:00	13:00-13:59	40.2714	0.169406	0.0865004	3.01739	6	527.25	12.914	210.708	132.417	1.95844
2000	07	Jul	2000-07-21	13:33:00	13:00-13:59	36.2993	0.123226	0.058662	11.4079	2	243.45	5.7223	173.54	126.546	2.10061
2000	07	Jul	2000-07-21	14:01:00	14:00-14:59	26.6121	0.077225	0.0294171	4.29567	3	314.4	10.4151	178.784	139.82	2.62517
2000	07	Jul	2000-07-21	14:05:00	14:00-14:59	25.3191	0.0692068	0.0211968	6.37191	6	527.25	6.85955	125.116	117.3	3.26496
2000	07	Jul	2000-07-21	14:16:00	14:00-14:59	27.9474	0.0847454	0.0232275	8.17105	1	172.5	9.53014	183.946	152.098	3.64849
2000	07	Jul	2000-07-21	14:17:00	14:00-14:59	37.3623	0.14928	0.040402	3.27929	8	669.15	10.373	197.781	20.8362	3.69486
2000	07	Jul	2000-07-21	14:18:00	14:00-14:59	41.5172	0.195353	0.0617565	3.00569	7	598.2	12.1073	260.237	132.482	3.16328
2000	07	Jul	2000-07-21	14:18:00	14:00-14:59	37.7121	0.169096	0.059994	2.91608	9	740.1	11.7223	150.578	132.175	2.81855
2000	07	Jul	2000-07-21	14:19:00	14:00-14:59	37.6342	0.150837	0.0402914	3.99492	3	314.4	10.0347	207.527	48.0569	3.74366
2000	07	Jul	2000-07-21	14:19:00	14:00-14:59	29.2529	0.0836475	0.0304999	6.42477	4	385.35	7.79929	170.377	174.196	2.74255
2000	07	Jul	2000-07-21	14:20:00	14:00-14:59	29.8067	0.0920585	0.038046	4.70602	6	527.25	9.14647	236.442	167.861	2.41966
2000	07	Jul	2000-07-21	14:34:00	14:00-14:59	29.0171	0.0995957	0.0263199	5.19432	4	385.35	9.68259	205.871	169.401	3.78405
2000	07	Jul	2000-07-21	14:34:00	14:00-14:59	31.1277	0.103659	0.0334943	3.69345	6	527.25	10.8216	157.489	23.4597	3.09481
2000	07	Jul	2000-07-22	12:05:00	12:00-12:59	39.5263	0.167458	0.0431169	6.06017	2	243.45	10.2878	191.572	83.7837	3.88382
2000	07	Jul	2000-07-22	12:18:00	12:00-12:59	32.4688	0.0950061	0.0442282	7.86725	2	243.45	7.24127	156.504	43.2892	2.14809
2000	07	Jul	2000-07-26	09:02:00	09:00-09:59	29.6003	0.100935	0.0264632	8.75935	1	172.5	8.52694	234.483	56.849	3.81417
2000	07	Jul	2000-07-26	09:16:00	09:00-09:59	29.1601	0.0878562	0.0305036	10.9335	2	243.45	5.1416	239.674	58.7742	2.88019
2000	07	Jul	2000-07-26	09:49:00	09:00-09:59	25.2989	0.0738336	0.0186197	10.9194	3	314.4	3.63583	6.01662	87.9484	3.96535
2000	07	Jul	2000-07-26	10:05:00	10:00-10:59	31.1945	0.107344	0.0357577	4.51652	4	385.35	9.51841	84.3758	133.503	3.00198
2000	07	Jul	2000-07-26	10:18:00	10:00-10:59	26.6991	0.0706009	0.0351763	8.24437	6	527.25	5.33509	201.897	171.08	2.00706
2000	07	Jul	2000-07-26	10:32:00	10:00-10:59	29.8246	0.104091	0.0311784	9.02308	5	456.3	5.03694	122.532	114.399	3.33857
2000	07	Jul	2000-07-26	10:47:00	10:00-10:59	25.3103	0.0728326	0.0211697	8.90326	3	314.4	6.64004	168.819	178.794	3.44042
2000	07	Jul	2000-07-26	10:49:00	10:00-10:59	40.953	0.178901	0.0561855	10.4652	2	243.45	6.01338	176.084	30.1711	3.18412
2000	07	Jul	2000-07-26	10:50:00	10:00-10:59	38.2755	0.166504	0.0424704	5.01293	9	740.1	6.86872	58.174	21.7429	3.92048
2000	07	Jul	2000-07-26	11:05:00	11:00-11:59	36.0158	0.137709	0.0382731	9.09964	2	243.45	7.24127	96.9424	103.065	3.59805
2000	07	Jul	2000-07-26	11:16:00	11:00-11:59	28.9092	0.0953171	0.0237202	5.70449	7	598.2	6.8097	133.184	91.1367	4.0184
2000	07	Jul	2000-07-26	11:19:00	11:00-11:59	33.3701	0.124933	0.0423092	19.2933	3	314.4	2.89942	212.916	51.2301	2.95286
2000	07	Jul	2000-07-26	11:50:00	11:00-11:59	26.7272	0.0788562	0.0222673	8.54729	3	314.4	6.68852	105.016	139.282	3.54134
2000	07	Jul	2000-07-26	12:03:00	12:00-12:59	28.271	0.0807734	0.0376473	6.60499	4	385.35	7.10805	29.2749	73.0186	2.14553
2000	07	Jul	2000-07-26	12:05:00	12:00-12:59	29.2947	0.0927527	0.0332318	9.48725	5	456.3	4.81793	346.756	140.507	2.79108
2000	07	Jul	2000-07-26	13:01:00	13:00-13:59	32.8687	0.127135	0.0324961	6.93925	4	385.35	6.97557	96.3064	156.569	3.9123
2000	07	Jul	2000-07-26	13:19:00	13:00-13:59	29.7748	0.0922958	0.0338934	28.7951	1	172.5	3.06545	325.136	15.1934	2.72312
2000	07	Jul	2000-07-26	14:05:00	14:00-14:59	26.3461	0.0779544	0.0204683	18.7696	1	172.5	4.57089	101.767	152.834	3.80854
2000	07	Jul	2000-07-26	14:32:00	14:00-14:59	35.0028	0.123752	0.0661456	7.08447	2	243.45	9.17807	90.7507	167.204	1.87091
2000	07	Jul	2000-07-26	14:34:00	14:00-14:59	41.4256	0.202118	0.0533381	2.6975	7	598.2	12.8197	66.3908	50.1304	3.78936
2000	07	Jul	2000-07-27	09:04:00	09:00-09:59	41.0759	0.199048	0.0501544	11.4216	4	385.35	3.64603	319.776	167.112	3.9687
2000	07	Jul	2000-07-27	09:04:00	09:00-09:59	26.9267	0.0835374	0.0239088	6.06207	7	598.2	6.60333	33.416	85.7569	3.494
2000	07	Jul	2000-07-27	09:17:00	09:00-09:59	33.4331	0.142482	0.036061	4.62175	8	669.15	7.38652	232.739	35.3798	3.95112
2000	07	Jul	2000-07-27	09:47:00	09:00-09:59	33.6226	0.133791	0.0331509	11.8988	3	314.4	4.58127	57.6706	117.677	4.0358
2000	07	Jul	2000-07-27	09:47:00	09:00-09:59	26.9761	0.0863604	0.0278366	9.65589	5	456.3	4.71541	172.847	173.609	3.10241
2000	07	Jul	2000-07-27	09:49:00	09:00-09:59	30.5334	0.1009	0.0374347	6.86344	3	314.4	7.51118	53.7431	78.3326	2.69536
2000	07	Jul	2000-07-27	10:04:00	10:00-10:59	34.204	0.141209	0.035857	3.0976	8	669.15	10.8341	31.4928	82.2084	3.93811
2000	07	Jul	2000-07-27	10:34:00	10:00-10:59	38.6402	0.161319	0.041438	6.43094	2	243.45	10.0449	357.402	160.672	3.89301
2000	07	Jul	2000-07-27	12:34:00	12:00-12:59	27.0983	0.0700749	0.0291513	10.9207	1	172.5	7.67958	94.9671	144.464	2.40383
2000	07	Jul	2000-07-27	12:48:00	12:00-12:59	32.7708	0.113355	0.0282435	5.5891	7	598.2	7.02939	1.21008	113.247	4.01349
2000	07	Jul	2000-07-27	13:48:00	13:00-13:59	36.7787	0.1439	0.0385198	8.41415	2	243.45	7.94425	82.2037	116.774	3.73575
2000	07	Jul	2000-07-27	14:01:00	14:00-14:59	29.4046	0.0807099	0.0503945	7.27763	2	243.45	9.50619	14.9004	146.761	1.60156
2000	07	Jul	2000-07-28	09:50:00	09:00-09:59	36.3648	0.133649	0.0525162	5.05775	5	456.3	7.73155	85.6381	86.7618	2.54492
2000	07	Jul	2000-07-29	11:50:00	11:00-11:59	41.162	0.167562	0.0562648	8.01204	2	243.45	7.4964	104.767	164.749	2.97809
2000	07	Jul	2000-07-29	12:47:00	12:00-12:59	25.0521	0.0712922	0.0178905	7.39845	1	172.5	11.7999	55.7589	133.513	3.98492
2000	07	Jul	2000-07-29	14:02:00	14:00-14:59	41.6853	0.183615	0.0456589	4.93753	4	385.35	9.51841	59.7549	127.006	4.02146
2000	07	Jul	2000-07-29	14:17:00	14:00-14:59	40.4401	0.178469	0.0462532	10.6241	2	243.45	6.11711	67.3925	140.743	3.85852
2000	07	Jul	2000-07-29	14:48:00	14:00-14:59	32.7663	0.126281	0.0358909	7.46478	2	243.45	9.02237	113.064	17.8185	3.51845
2000	07	Jul	2000-07-30	09:05:00	09:00-09:59	27.7764	0.0858442	0.0223053	6.15325	2	243.45	10.2878	163.214	12.2018	3.8486
2000	07	Jul	2000-07-30	09:05:00	09:00-09:59	40.9772	0.180649	0.0603952	5.18919	7	598.2	7.14463	197.139	39.3456	2.99111
2000	07	Jul	2000-07-30	09:46:00	09:00-09:59	36.0169	0.14562	0.03924	8.00922	2	243.45	6.33567	104.167	4.63246	3.711
2000	07	Jul	2000-07-30	10:34:00	10:00-10:59	33.7432	0.110196	0.0394323	10.8191	3	314.4	5.2061	62.6675	112.106	2.79455
2000	07	Jul	2000-07-30	10:48:00	10:00-10:59	32.9716	0.111007	0.0377233	4.68632	7	598.2	8.38136	67.496	30.9133	2.94266
2000	07	Jul	2000-07-30	12:02:00	12:00-12:59	28.6305	0.0937392	0.027641	9.5307	5	456.3	4.71541	317.859	26.3052	3.39131
2000	07	Jul	2000-07-30	12:20:00	12:00-12:59	28.7633	0.096462	0.0239159	8.73786	1	172.5	9.53014	102.474	152.337	4.03339
2000	07	Jul	2000-07-30	12:50:00	12:00-12:59	36.8232	0.142573	0.046133	11.6109	2	243.45	5.7223	169.18	45.1448	3.09048
2000	07	Jul	2000-07-30	13:02:00	13:00-13:59	26.4267	0.0841976	0.027828	4.18648	8	669.15	9.55929	64.1571	167.362	3.02564
2000	07	Jul	2000-07-30	13:35:00	13:00-13:59	27.8848	0.0797451	0.0226542	11.4087	2	243.45	5.81615	97.1215	169.774	3.52011
2000	07	Jul	2000-07-30	14:46:00	14:00-14:59	39.4432	0.192312	0.0472425	2.82657	7	598.2	11.9414	111.908	170.75	4.07073
2000	07	Jul	2000-07-31	10:04:00	10:00-10:59	29.5155	0.0932581	0.0250992	6.00773	3	314.4	8.4853	22.4561	104.673	3.71559
2000	07	Jul	2000-07-31	10:04:00	10:00-10:59	28.6726	0.0848093	0.024416	4.17318	6	527.25	10.4534	147.804	84.9367	3.47352
2000	07	Jul	2000-07-31	11:20:00	11:00-11:59	31.2138	0.103795	0.0309897	5.85945	3	314.4	8.0385	26.2117	69.4169	3.34933
2000	07	Jul	2000-07-31	13:17:00	13:00-13:59	40.8123	0.181406	0.0455379	2.93493	5	456.3	12.7889	4.47144	13.3752	3.98362
2000	07	Jul	2000-07-31	13:35:00	13:00-13:59	39.2675	0.138599	0.0629209	8.84489	4	385.35	5.505	333.236	93.8523	2.20274
2000	07	Jul	2000-07-31	14:16:00	14:00-14:59	32.7469	0.117762	0.0287681	2.84055	7	598.2	10.3773	16.9183	175.122	4.0935
2000	07	Jul	2000-07-31	14:18:00	14:00-14:59	28.2628	0.0845362	0.0231915	10.6306	1	172.5	8.24694	354.365	179.987	3.64514
2000	08	Aug	2000-08-01	10:48:00	10:00-10:59	34.7914	0.127916	0.0345264	3.95237	2	243.45	16.9185	110.337	67.5273	3.70488
2000	08	Aug	2000-08-01	13:32:00	13:00-13:59	41.2586	0.164189	0.0634018	6.07911	3	314.4	8.4853	25.6757	165.883	2.58966
2000	08	Aug	2000-08-03	13:02:00	13:00-13:59	35.361	0.167154	0.0482103	1.78405	12	952.95	18.2719	73.2611	90.8469	3.46719
2000	08	Aug	2000-08-04	10:16:00	10:00-10:59	32.3845	0.116889	0.038253	10.1364	2	243.45	6.45092	156.605	117.432	3.05568
2000	08	Aug	2000-08-04	10:17:00	10:00-10:59	25.587	0.0630598	0.0282277	7.615	4	385.35	6.10347	126.986	143.071	2.23397
2000	08	Aug	2000-08-04	11:16:00	11:00-11:59	39.9579	0.173688	0.04508	6.81773	5	456.3	6.27256	197.712	67.7727	3.85288
2000	08	Aug	2000-08-04	11:17:00	11:00-11:59	28.7577	0.0907773	0.0265965	5.12979	1	172.5	16.2634	157.467	7.3556	3.41313
2000	08	Aug	2000-08-04	11:32:00	11:00-11:59	28.8764	0.0741901	0.0346522	4.58476	4	385.35	10.0286	157.265	168.836	2.14099
2000	08	Aug	2000-08-04	11:32:00	11:00-11:59	35.6753	0.127459	0.0431293	5.73237	4	385.35	8.25821	163.94	160.396	2.95527
2000	08	Aug	2000-08-04	11:33:00	11:00-11:59	40.61	0.152666	0.0634974	6.14554	4	385.35	7.90917	155.412	121.996	2.40429
2000	08	Aug	2000-08-04	11:49:00	11:00-11:59	31.8535	0.121499	0.0326114	9.73189	1	172.5	8.24694	171.22	0.569975	3.72567
2000	08	Aug	2000-08-04	11:49:00	11:00-11:59	33.2015	0.135645	0.0348075	3.65431	4	385.35	11.8658	157.856	150.984	3.89699
2000	08	Aug	2000-08-04	11:50:00	11:00-11:59	38.1528	0.152942	0.0626588	6.17603	2	243.45	8.44904	164.973	72.7132	2.44087
2000	08	Aug	2000-08-04	11:50:00	11:00-11:59	31.1515	0.0963724	0.0325498	5.17086	4	385.35	8.77452	151.052	29.1773	2.96077
2000	08	Aug	2000-08-04	12:16:00	12:00-12:59	28.6214	0.0861897	0.0273303	11.3383	2	243.45	6.11711	245.843	64.5931	3.15363
2000	08	Aug	2000-08-04	12:16:00	12:00-12:59	30.8124	0.110283	0.0278705	6.01297	4	385.35	7.64008	120.276	27.987	3.957
2000	08	Aug	2000-08-04	12:18:00	12:00-12:59	25.1401	0.0682749	0.0191921	8.42119	4	385.35	6.23912	127.124	1.83914	3.55744
2000	08	Aug	2000-08-04	12:19:00	12:00-12:59	40.076	0.154337	0.0574213	6.17927	3	314.4	8.9847	165.068	1.466	2.68779
2000	08	Aug	2000-08-04	12:20:00	12:00-12:59	37.4784	0.139229	0.0515625	4.60976	3	314.4	10.4151	134.379	8.6844	2.7002
2000	08	Aug	2000-08-04	14:01:00	14:00-14:59	34.346	0.12314	0.036783	7.28261	5	456.3	6.15639	282.42	22.431	3.34775
2000	08	Aug	2000-08-04	14:01:00	14:00-14:59	30.2178	0.0999324	0.0283485	5.52174	6	527.25	7.68281	242.122	54.539	3.52514
2000	08	Aug	2000-08-04	14:02:00	14:00-14:59	27.674	0.0933706	0.0241073	3.27283	5	456.3	12.315	143.63	4.21267	3.87312
2000	08	Aug	2000-08-04	14:03:00	14:00-14:59	36.5852	0.142395	0.0482676	5.65603	2	243.45	11.8332	183.128	163.139	2.95011
2000	08	Aug	2000-08-04	14:20:00	14:00-14:59	35.1244	0.124857	0.0413849	3.79858	4	385.35	8.91384	125.827	170.381	3.01697
2000	08	Aug	2000-08-04	14:31:00	14:00-14:59	32.3731	0.0858985	0.0520188	9.54718	2	243.45	7.24127	113.645	51.4821	1.6513
2000	08	Aug	2000-08-04	14:31:00	14:00-14:59	27.3043	0.0743486	0.0275658	4.59547	3	314.4	11.8529	130.346	20.842	2.69713
2000	08	Aug	2000-08-04	14:46:00	14:00-14:59	33.2012	0.126379	0.053093	7.22533	3	314.4	7.57328	158.112	23.5972	2.38034
2000	08	Aug	2000-08-04	14:49:00	14:00-14:59	35.0349	0.114736	0.0450722	7.54147	4	385.35	5.97359	126.855	143.879	2.5456
2000	08	Aug	2000-08-04	14:49:00	14:00-14:59	38.8668	0.14315	0.057392	6.19929	4	385.35	7.58844	88.3144	90.2415	2.49425
2000	08	Aug	2000-08-04	14:50:00	14:00-14:59	41.8974	0.184145	0.0528558	8.78848	6	527.25	4.49266	321.735	30.052	3.48392
2000	08	Aug	2000-08-05	11:19:00	11:00-11:59	36.6617	0.121676	0.0568126	4.31483	4	385.35	10.211	101.223	109.522	2.1417
2000	08	Aug	2000-08-05	11:19:00	11:00-11:59	26.5773	0.0624998	0.0310225	5.4709	5	456.3	8.63544	93.8495	68.4821	2.01466
2000	08	Aug	2000-08-05	11:34:00	11:00-11:59	31.2166	0.103385	0.0416897	7.44153	6	527.25	5.33509	259.269	82.8069	2.47987
2000	08	Aug	2000-08-05	12:48:00	12:00-12:59	41.7874	0.180538	0.0666737	14.2396	2	243.45	4.60727	135.879	13.7216	2.70779
2000	08	Aug	2000-08-05	13:20:00	13:00-13:59	38.5657	0.154411	0.0623237	14.2284	2	243.45	4.66791	164.847	55.0056	2.47756
2000	08	Aug	2000-08-05	14:02:00	14:00-14:59	36.6966	0.151282	0.0381718	6.24042	4	385.35	7.24565	87.6323	78.4316	3.96318
2000	08	Aug	2000-08-05	14:02:00	14:00-14:59	36.6052	0.138593	0.0426366	6.91049	5	456.3	6.3932	158.578	137.761	3.25057
2000	08	Aug	2000-08-05	14:02:00	14:00-14:59	27.8477	0.0832664	0.0232323	4.42863	8	669.15	8.86398	83.7901	108.781	3.58409
2000	08	Aug	2000-08-05	14:16:00	14:00-14:59	40.4848	0.176596	0.044829	5.74997	6	527.25	6.19566	111.152	6.6016	3.93933
2000	08	Aug	2000-08-05	14:17:00	14:00-14:59	31.0265	0.0934039	0.0361962	10.2841	2	243.45	6.69447	76.661	142.841	2.58049
2000	08	Aug	2000-08-05	14:17:00	14:00-14:59	29.0566	0.0899813	0.0244511	6.13363	2	243.45	11.2689	83.9635	154.993	3.68004
2000	08	Aug	2000-08-05	14:18:00	14:00-14:59	31.3198	0.0974941	0.0367885	10.8896	1	172.5	7.98475	92.9776	143.578	2.65012
2000	08	Aug	2000-08-05	14:32:00	14:00-14:59	29.6663	0.0950122	0.0238395	6.8735	2	243.45	9.85865	182.637	19.7519	3.9855
2000	08	Aug	2000-08-05	14:47:00	14:00-14:59	28.1197	0.0916279	0.0269783	6.66887	4	385.35	7.64008	278.931	4.59606	3.39636
2000	08	Aug	2000-08-06	10:16:00	10:00-10:59	32.7262	0.118724	0.0354996	6.13426	1	172.5	11.5289	131.367	21.6258	3.34437
2000	08	Aug	2000-08-06	11:48:00	11:00-11:59	28.4582	0.0849989	0.0228187	5.98115	5	456.3	6.78468	128.806	42.4418	3.72498
2000	08	Aug	2000-08-06	12:01:00	12:00-12:59	27.7649	0.0809379	0.0231146	7.86932	4	385.35	6.52937	81.4591	144.168	3.50159
2000	08	Aug	2000-08-06	13:50:00	13:00-13:59	31.6102	0.114092	0.0347521	4.18639	6	527.25	8.73065	201.424	71.2746	3.28303
2000	08	Aug	2000-08-06	14:18:00	14:00-14:59	31.6541	0.111155	0.0315627	8.76504	1	172.5	9.38762	147.426	91.0636	3.52171
2000	08	Aug	2000-08-06	14:20:00	14:00-14:59	34.7598	0.137129	0.0362553	6.82452	1	172.5	12.1818	122.868	161.992	3.78231
2000	08	Aug	2000-08-06	14:48:00	14:00-14:59	31.5813	0.0886657	0.0417381	3.75679	1	172.5	20.037	146.103	28.8708	2.12433
2000	08	Aug	2000-08-06	14:48:00	14:00-14:59	30.1125	0.10836	0.0306789	4.08444	3	314.4	11.6518	159.357	24.3631	3.53207
2000	08	Aug	2000-08-07	10:32:00	10:00-10:59	29.0962	0.0893996	0.0224885	6.70316	2	243.45	10.2878	109.45	17.9189	3.97535
2000	08	Aug	2000-08-07	12:01:00	12:00-12:59	28.8187	0.08799	0.0251818	3.66211	5	456.3	12.5475	101.484	156.281	3.49419
2000	08	Aug	2000-08-07	12:19:00	12:00-12:59	26.1227	0.0588196	0.0305071	10.0673	3	314.4	5.94999	81.5043	122.166	1.92806
2000	08	Aug	2000-08-07	13:34:00	13:00-13:59	33.1907	0.105077	0.0496919	10.6639	1	172.5	8.24694	169.809	20.7169	2.11456
2000	08	Aug	2000-08-07	14:49:00	14:00-14:59	26.4815	0.0760841	0.0274355	3.24956	5	456.3	13.5724	137.955	163.252	2.7732
2000	08	Aug	2000-08-10	12:01:00	12:00-12:59	28.0349	0.078003	0.0267233	5.30789	4	385.35	9.35971	92.8571	91.0961	2.91891
2000	08	Aug	2000-08-10	12:03:00	12:00-12:59	35.1477	0.131164	0.0351465	2.02441	7	598.2	16.4495	78.3988	140.292	3.73192
2000	08	Aug	2000-08-10	12:05:00	12:00-12:59	35.6727	0.134838	0.0349041	3.84307	4	385.35	12.2992	74.0671	109.581	3.8631
2000	08	Aug	2000-08-10	12:05:00	12:00-12:59	25.796	0.0722657	0.0191152	5.28165	4	385.35	9.85253	101.281	54.8043	3.78054
2000	08	Aug	2000-08-10	12:34:00	12:00-12:59	33.2719	0.119027	0.0354315	3.44478	6	527.25	11.8209	114.986	67.3106	3.35936
2000	08	Aug	2000-08-10	13:49:00	13:00-13:59	25.3432	0.0716263	0.0200752	5.98026	1	172.5	12.084	68.7001	82.5577	3.5679
2000	08	Aug	2000-08-11	09:48:00	09:00-09:59	28.1364	0.0920858	0.0234153	6.75134	5	456.3	6.64896	226.083	22.9944	3.93272
2000	08	Aug	2000-08-11	10:18:00	10:00-10:59	31.1709	0.0892023	0.0594339	8.46096	5	456.3	5.44984	70.215	47.7933	1.50087
2000	08	Aug	2000-08-11	10:20:00	10:00-10:59	29.5207	0.0994376	0.0286457	11.4372	4	385.35	4.3192	27.3242	76.5679	3.47129
2000	08	Aug	2000-08-11	10:33:00	10:00-10:59	39.1468	0.181699	0.0523339	5.68169	9	740.1	5.95791	249.786	96.9264	3.47193
2000	08	Aug	2000-08-11	11:17:00	11:00-11:59	26.8078	0.0792869	0.0213683	9.09846	1	172.5	9.38762	98.4038	125.159	3.71049
2000	08	Aug	2000-08-11	12:03:00	12:00-12:59	38.2182	0.158728	0.0468106	5.37392	6	527.25	6.85955	203.202	32.4358	3.39085
2000	08	Aug	2000-08-11	12:05:00	12:00-12:59	31.9579	0.114926	0.0293822	15.4657	1	172.5	4.74346	263.97	98.4145	3.91142
2000	08	Aug	2000-08-11	12:18:00	12:00-12:59	26.3243	0.0728926	0.0265714	30.1191	1	172.5	2.92284	115.113	80.6485	2.74328
2000	08	Aug	2000-08-11	12:47:00	12:00-12:59	29.158	0.0970869	0.0267987	9.13737	1	172.5	9.53014	178.462	145.081	3.62282
2000	08	Aug	2000-08-11	12:49:00	12:00-12:59	40.0426	0.183936	0.046145	16.6683	1	172.5	5.02823	266.264	80.2858	3.98603
2000	08	Aug	2000-08-11	13:17:00	13:00-13:59	31.6991	0.116835	0.0294276	8.53344	3	314.4	6.06823	165.661	147.017	3.97025
2000	08	Aug	2000-08-11	13:19:00	13:00-13:59	25.3462	0.076779	0.0207157	4.59103	8	669.15	8.86398	225.835	42.87	3.70632
2000	08	Aug	2000-08-12	10:01:00	10:00-10:59	26.0656	0.0745512	0.0203779	3.81549	6	527.25	10.8216	250.98	58.9525	3.65844
2000	08	Aug	2000-08-12	10:18:00	10:00-10:59	34.1	0.132126	0.038954	12.591	1	172.5	6.33916	255.821	5.36342	3.39184
2000	08	Aug	2000-08-12	11:48:00	11:00-11:59	34.5984	0.13243	0.0341081	3.64129	6	527.25	11.2992	248.923	142.188	3.88267
2000	08	Aug	2000-08-12	12:18:00	12:00-12:59	28.728	0.0842807	0.0289021	3.33452	4	385.35	11.7009	308.266	74.6072	2.91608
2000	08	Aug	2000-08-12	12:19:00	12:00-12:59	33.5312	0.10976	0.0379046	10.0838	2	243.45	6.57044	342.985	116.074	2.89568
2000	08	Aug	2000-08-12	12:48:00	12:00-12:59	30.6435	0.0817684	0.0402592	7.64943	2	243.45	8.94648	355.832	101.054	2.03105
2000	08	Aug	2000-08-12	13:03:00	13:00-13:59	29.6452	0.0886991	0.0290679	5.88113	5	456.3	7.91567	307.431	129.443	3.05145
2000	08	Aug	2000-08-12	13:04:00	13:00-13:59	29.204	0.0815623	0.0298415	9.59446	2	243.45	7.24127	351.793	88.5025	2.73319
2000	08	Aug	2000-08-13	09:20:00	09:00-09:59	37.0517	0.148023	0.0411341	7.58418	6	527.25	4.74227	184.199	28.0847	3.59855
2000	08	Aug	2000-08-13	14:33:00	14:00-14:59	41.5442	0.152522	0.0741761	8.09139	2	243.45	7.4964	355.647	64.2748	2.05621
2000	08	Aug	2000-08-15	09:35:00	09:00-09:59	41.8506	0.178265	0.0521832	6.17917	3	314.4	6.3633	111.058	62.1544	3.41615
2000	08	Aug	2000-08-15	11:50:00	11:00-11:59	27.2757	0.076985	0.0239495	9.03805	4	385.35	5.01343	20.0557	160.801	3.21448
2000	08	Aug	2000-08-15	13:35:00	13:00-13:59	26.0143	0.059627	0.0286581	7.94775	5	456.3	5.83233	29.0726	36.8377	2.08063
2000	08	Aug	2000-08-16	11:16:00	11:00-11:59	30.3574	0.0937604	0.0303831	3.84835	5	456.3	11.875	36.4522	50.3689	3.08593
2000	08	Aug	2000-08-20	10:19:00	10:00-10:59	29.064	0.0930705	0.024923	9.55624	3	314.4	6.0283	175.84	6.43236	3.73432
2000	08	Aug	2000-08-20	10:31:00	10:00-10:59	30.9487	0.115152	0.0285322	8.98501	4	385.35	5.39912	200.809	174.223	4.03588
2000	08	Aug	2000-08-20	11:01:00	11:00-11:59	26.2773	0.0742714	0.0203979	12.6986	1	172.5	6.85834	241.918	66.2071	3.64113
2000	08	Aug	2000-08-20	11:31:00	11:00-11:59	34.5622	0.127573	0.0369842	9.47966	5	456.3	4.71541	203.786	156.38	3.4494
2000	08	Aug	2000-08-20	11:48:00	11:00-11:59	39.5524	0.185292	0.060732	8.15373	4	385.35	5.72973	189.132	157.572	3.05098
2000	08	Aug	2000-08-20	12:32:00	12:00-12:59	27.8622	0.0901703	0.0284481	7.45744	7	598.2	5.3148	15.6115	17.4381	3.16964
2000	08	Aug	2000-08-22	14:17:00	14:00-14:59	31.7536	0.0931085	0.0408745	13.2592	4	385.35	3.71847	234.513	43.9568	2.27791
2000	08	Aug	2000-08-23	09:31:00	09:00-09:59	32.3049	0.10791	0.0293504	3.63662	4	385.35	8.77452	228.14	176.593	3.67661
2000	08	Aug	2000-08-23	09:47:00	09:00-09:59	30.0126	0.0940063	0.0266879	7.36112	2	243.45	8.44904	235.283	174.759	3.52243
2000	08	Aug	2000-08-23	10:18:00	10:00-10:59	40.6686	0.163456	0.0692044	5.29452	5	456.3	7.5558	237.859	2.58707	2.36193
2000	08	Aug	2000-08-23	10:19:00	10:00-10:59	36.1898	0.131718	0.0425174	8.46939	4	385.35	5.72973	219.176	139.674	3.09797
2000	08	Aug	2000-08-23	11:17:00	11:00-11:59	28.4013	0.0833558	0.0278678	4.78822	1	172.5	16.0038	243.144	50.397	2.99112
2000	08	Aug	2000-08-23	11:17:00	11:00-11:59	29.7326	0.0891797	0.0305356	5.04305	2	243.45	13.6573	274.344	49.7763	2.92052
2000	08	Aug	2000-08-23	11:17:00	11:00-11:59	35.3049	0.127865	0.0365887	4.06635	3	314.4	13.4816	236.36	33.7257	3.49465
2000	08	Aug	2000-08-23	11:19:00	11:00-11:59	25.5735	0.0591736	0.0263569	4.46866	4	385.35	11.2326	247.256	124.001	2.24509
2000	08	Aug	2000-08-23	11:20:00	11:00-11:59	27.3851	0.0860027	0.0223707	3.84284	3	314.4	10.6574	231.994	16.3172	3.84443
2000	08	Aug	2000-08-23	11:20:00	11:00-11:59	32.1847	0.110389	0.0298579	3.62862	5	456.3	12.315	286.128	121.227	3.69716
2000	08	Aug	2000-08-23	11:32:00	11:00-11:59	29.4208	0.0905941	0.023122	4.53623	2	243.45	13.8711	258.94	102.092	3.91809
2000	08	Aug	2000-08-23	11:32:00	11:00-11:59	27.7812	0.0891585	0.0270385	3.55069	5	456.3	13.0398	208.77	4.14616	3.29746
2000	08	Aug	2000-08-23	11:47:00	11:00-11:59	41.1704	0.188098	0.0516767	4.57764	3	314.4	10.0347	215.284	178.54	3.6399
2000	08	Aug	2000-08-23	12:01:00	12:00-12:59	35.4192	0.139794	0.037111	6.63142	2	243.45	8.58543	215.532	96.0073	3.76692
2000	08	Aug	2000-08-23	12:03:00	12:00-12:59	30.586	0.0998929	0.0280167	4.17221	3	314.4	12.9723	220.471	33.8948	3.56548
2000	08	Aug	2000-08-23	12:46:00	12:00-12:59	38.7991	0.148525	0.0510323	10.7955	1	172.5	7.98475	198.271	118.946	2.91041
2000	08	Aug	2000-08-24	09:17:00	09:00-09:59	26.09	0.0721559	0.0250695	7.63016	2	243.45	8.58543	222.05	17.9019	2.87823
2000	08	Aug	2000-08-24	09:35:00	09:00-09:59	31.655	0.1055	0.0393934	8.92053	5	456.3	5.03694	117.877	117.68	2.67812
2000	08	Aug	2000-08-24	10:04:00	10:00-10:59	40.23	0.188159	0.046373	4.43678	4	385.35	10.4002	197.805	24.3842	4.05752
2000	08	Aug	2000-08-24	10:48:00	10:00-10:59	31.3341	0.101101	0.0301186	21.2059	2	243.45	3.22489	196.977	179.195	3.35677
2000	08	Aug	2000-08-24	11:34:00	11:00-11:59	38.8404	0.17912	0.0448824	9.0232	1	172.5	8.98455	241.123	56.5712	3.99087
2000	08	Aug	2000-08-24	12:17:00	12:00-12:59	27.4281	0.0841935	0.0380387	4.82107	4	385.35	7.29272	191.408	173.53	2.21337
2000	08	Aug	2000-08-24	12:34:00	12:00-12:59	40.698	0.190825	0.0530458	6.99615	6	527.25	5.56707	229.444	78.0727	3.59735
2000	08	Aug	2000-08-24	12:49:00	12:00-12:59	25.5856	0.0703384	0.0175383	9.70578	3	314.4	6.06823	283.921	120.508	4.01056
2000	08	Aug	2000-08-24	13:04:00	13:00-13:59	29.4986	0.10313	0.0286974	8.40696	4	385.35	5.97359	267.772	49.5365	3.59372
2000	08	Aug	2000-08-24	13:05:00	13:00-13:59	30.2089	0.108906	0.0319759	6.96592	5	456.3	6.27256	189.182	145.409	3.40589
2000	08	Aug	2000-08-24	13:48:00	13:00-13:59	27.1844	0.0833081	0.0213507	7.13682	3	314.4	7.7659	260.208	34.5062	3.90189
2000	08	Aug	2000-08-24	14:35:00	14:00-14:59	25.3031	0.0721115	0.0254023	7.93427	3	314.4	7.38999	250.985	168.027	2.83878
2000	08	Aug	2000-08-24	14:49:00	14:00-14:59	28.8143	0.106302	0.0333414	5.08196	8	669.15	7.16925	169.441	146.507	3.1883
2000	08	Aug	2000-08-25	09:33:00	09:00-09:59	27.3822	0.077518	0.0296072	4.6879	2	243.45	14.5549	214.698	7.53261	2.61821
2000	08	Aug	2000-08-25	13:17:00	13:00-13:59	31.8576	0.10943	0.028269	2.72671	5	456.3	15.5885	243.437	172.591	3.87102
2000	08	Aug	2000-08-25	13:31:00	13:00-13:59	34.1164	0.132849	0.0335264	4.22476	1	172.5	20.3632	181.321	139.039	3.96252
2000	08	Aug	2000-08-27	11:47:00	11:00-11:59	26.8314	0.07345	0.0224802	5.50622	3	314.4	10.7408	48.7615	60.7982	3.26732
2000	08	Aug	2000-08-27	12:05:00	12:00-12:59	30.9638	0.0927022	0.0362557	3.93558	3	314.4	12.5001	55.055	80.1397	2.5569
2000	08	Aug	2000-08-30	09:18:00	09:00-09:59	29.2132	0.104059	0.0268248	3.14508	6	527.25	13.0234	266.01	24.8239	3.87922
2000	08	Aug	2000-08-30	10:31:00	10:00-10:59	33.0035	0.122198	0.0298078	10.1725	1	172.5	6.98549	216.294	64.1154	4.09953
2000	08	Aug	2000-08-30	10:46:00	10:00-10:59	28.7887	0.0745938	0.0417276	6.86255	1	172.5	11.6178	265.469	114.828	1.78764
2000	08	Aug	2000-08-30	11:32:00	11:00-11:59	30.1743	0.082488	0.0406561	8.94153	1	172.5	9.90615	202.406	177.006	2.02892
2000	09	Sep	2000-09-03	13:01:00	13:00-13:59	27.0931	0.0830346	0.0208727	2.28143	4	385.35	17.0254	200.418	167.737	3.97815
2000	09	Sep	2000-09-04	13:17:00	13:00-13:59	32.1045	0.0949913	0.0476654	7.34688	1	172.5	9.67706	67.5533	16.9416	1.99288
2000	09	Sep	2000-09-04	13:20:00	13:00-13:59	28.2756	0.0881981	0.0218879	5.88542	3	314.4	8.64548	55.2804	123.229	4.02954
2000	09	Sep	2000-09-04	14:31:00	14:00-14:59	29.5154	0.0932049	0.023866	7.50613	1	172.5	11.7999	114.262	127.336	3.90535
2000	09	Sep	2000-09-06	13:49:00	13:00-13:59	41.9885	0.190471	0.0495931	4.03119	2	243.45	15.579	102.722	60.1237	3.84067
2000	09	Sep	2000-09-06	13:50:00	13:00-13:59	25.4183	0.0699513	0.0181072	2.10343	7	598.2	19.5204	107.924	114.52	3.86318
2000	09	Sep	2000-09-06	14:02:00	14:00-14:59	35.2452	0.135353	0.033992	6.12456	2	243.45	8.44904	97.5574	27.4167	3.9819
2000	09	Sep	2000-09-09	10:18:00	10:00-10:59	28.3484	0.0872398	0.0226436	7.96568	7	598.2	4.84235	59.8139	96.2564	3.85273
2000	09	Sep	2000-09-09	10:47:00	10:00-10:59	29.3111	0.0819069	0.0336675	24.5314	1	172.5	3.64315	284.42	124.467	2.43282
2000	09	Sep	2000-09-09	11:33:00	11:00-11:59	25.21	0.0716293	0.0200592	4.537	5	456.3	7.91567	175.995	72.3678	3.5709
2000	09	Sep	2000-09-09	12:01:00	12:00-12:59	28.8311	0.0977475	0.0240927	20.4996	1	172.5	4.18983	106.871	147.379	4.05714
2000	09	Sep	2000-09-09	13:49:00	13:00-13:59	34.2063	0.119774	0.0347459	6.70084	3	314.4	8.18211	346.245	156	3.44714
2000	09	Sep	2000-09-09	14:19:00	14:00-14:59	32.9271	0.115841	0.0282818	9.42001	2	243.45	6.82328	25.3903	89.5403	4.09596
2000	09	Sep	2000-09-10	11:02:00	11:00-11:59	37.6722	0.148621	0.0411933	6.51817	2	243.45	8.2524	45.384	39.4903	3.60789
2000	09	Sep	2000-09-10	13:03:00	13:00-13:59	26.9087	0.0729629	0.0227016	8.50828	4	385.35	5.29724	38.4544	93.5712	3.214
2000	09	Sep	2000-09-10	13:20:00	13:00-13:59	25.378	0.059502	0.0252068	4.75033	6	527.25	8.35099	27.8331	4.20774	2.36055
2000	09	Sep	2000-09-10	14:20:00	14:00-14:59	35.6817	0.203777	0.0607362	7.96368	4	385.35	5.84912	329.959	37.6781	3.35512
2000	09	Sep	2000-09-10	14:48:00	14:00-14:59	28.2864	0.0817728	0.0249644	10.0387	2	243.45	6.57044	25.9164	17.76	3.27557
2000	09	Sep	2000-09-11	09:32:00	09:00-09:59	30.0258	0.10129	0.025263	7.29416	2	243.45	9.33925	64.9218	99.1225	4.00941
2000	09	Sep	2000-09-11	13:32:00	13:00-13:59	27.0703	0.0809376	0.0211044	4.81194	4	385.35	10.211	338.851	146.098	3.83511
2000	09	Sep	2000-09-11	14:16:00	14:00-14:59	25.4362	0.0645051	0.0214453	5.51746	1	172.5	14.6969	12.8176	175.151	3.00789
2000	09	Sep	2000-09-16	13:20:00	13:00-13:59	28.5429	0.0837171	0.0248001	2.65492	5	456.3	17.2025	71.3254	138.422	3.37567
2000	09	Sep	2000-09-22	11:33:00	11:00-11:59	29.2978	0.0943474	0.0246507	4.09827	4	385.35	11.7009	62.3963	123.926	3.82737
2000	09	Sep	2000-09-22	11:46:00	11:00-11:59	36.8473	0.163704	0.0401841	8.08226	1	172.5	9.90615	38.4656	95.909	4.07385
2000	09	Sep	2000-09-22	12:02:00	12:00-12:59	30.681	0.102815	0.0252351	3.70265	5	456.3	11.2709	60.7758	88.6038	4.07428
2000	09	Sep	2000-09-22	13:48:00	13:00-13:59	26.1775	0.0692309	0.0218164	5.80784	5	456.3	8.2089	111.874	157.302	3.17334
2000	09	Sep	2000-09-23	10:05:00	10:00-10:59	27.9484	0.0708353	0.0335794	6.46717	1	172.5	10.6636	322.641	28.1924	2.10949
2000	09	Sep	2000-09-23	11:32:00	11:00-11:59	41.098	0.193143	0.062301	4.93171	2	243.45	13.2488	274.364	78.3793	3.10016
2000	09	Sep	2000-09-23	12:18:00	12:00-12:59	41.0699	0.167272	0.055263	2.51247	4	385.35	17.2876	317.588	121.603	3.02684
2000	09	Sep	2000-09-24	09:33:00	09:00-09:59	30.0294	0.0924792	0.0271938	7.19778	1	172.5	9.1482	246.124	37.001	3.40075
2000	09	Sep	2000-09-25	09:18:00	09:00-09:59	41.5424	0.191012	0.0491282	1.85087	5	456.3	21.8149	18.4128	51.4601	3.88803
2000	09	Sep	2000-09-25	11:49:00	11:00-11:59	36.9827	0.138472	0.0410365	4.8477	4	385.35	7.69242	57.8378	140.362	3.37436
2000	09	Sep	2000-09-30	10:31:00	10:00-10:59	31.5656	0.104352	0.030257	9.64162	2	243.45	6.45092	246.673	28.3006	3.44884
2000	09	Sep	2000-09-30	14:20:00	14:00-14:59	30.6977	0.083162	0.043149	20.657	1	172.5	3.69674	60.0905	88.7714	1.92732
2001	05	May	2001-05-03	10:16:00	10:00-10:59	31.6522	0.110585	0.0279026	6.79288	3	314.4	7.51118	147.683	90.6458	3.96325
2001	05	May	2001-05-03	10:33:00	10:00-10:59	31.8902	0.106092	0.0329352	8.55339	3	314.4	6.64004	170.67	79.3269	3.22124
2001	05	May	2001-05-03	10:34:00	10:00-10:59	28.0227	0.0789764	0.0268156	5.98805	5	456.3	7.73155	216.495	64.2069	2.94517
2001	05	May	2001-05-03	11:19:00	11:00-11:59	27.363	0.0725475	0.0259252	6.42708	4	385.35	7.64008	165.802	57.5693	2.79834
2001	05	May	2001-05-03	11:19:00	11:00-11:59	26.978	0.0745147	0.0210621	6.24034	4	385.35	7.10805	156.741	86.3428	3.53785
2001	05	May	2001-05-05	12:49:00	12:00-12:59	27.4472	0.0772846	0.0331313	4.37705	1	172.5	16.8089	197.451	64.6856	2.33268
2001	05	May	2001-05-08	10:33:00	10:00-10:59	31.8425	0.102452	0.0308267	5.85419	3	314.4	9.68112	227.336	166.226	3.32348
2001	05	May	2001-05-08	11:05:00	11:00-11:59	36.2263	0.128273	0.0500775	8.31828	1	172.5	9.38762	246.823	107.121	2.56148
2001	05	May	2001-05-08	11:17:00	11:00-11:59	26.9043	0.0703157	0.0325235	5.80028	2	243.45	8.44904	228.877	13.1178	2.16199
2001	05	May	2001-05-08	12:35:00	12:00-12:59	32.0389	0.106179	0.0328825	10.7294	4	385.35	4.60245	305.598	170.577	3.22904
2001	05	May	2001-05-08	14:31:00	14:00-14:59	27.4398	0.0830897	0.020407	19.4043	1	172.5	4.57089	165.619	66.4923	4.07162
2001	05	May	2001-05-10	11:04:00	11:00-11:59	37.1328	0.147766	0.0403794	7.58793	2	243.45	8.58543	191.725	37.9421	3.65945
2001	05	May	2001-05-10	11:05:00	11:00-11:59	33.1392	0.114207	0.0428626	10.2887	2	243.45	5.29513	238.676	136.084	2.66448
2001	05	May	2001-05-10	11:19:00	11:00-11:59	34.276	0.116964	0.0373189	7.58922	2	243.45	8.79848	200.207	172.556	3.13417
2001	05	May	2001-05-10	12:18:00	12:00-12:59	35.3098	0.131367	0.0361917	8.16604	3	314.4	6.83831	271.693	82.4748	3.62976
2001	05	May	2001-05-10	12:47:00	12:00-12:59	35.293	0.125383	0.039465	3.79342	3	314.4	10.2595	267.251	139.116	3.17707
2001	05	May	2001-05-10	13:19:00	13:00-13:59	28.7041	0.101789	0.0261917	8.22138	1	172.5	10.3131	227.238	147.288	3.8863
2001	05	May	2001-05-10	13:49:00	13:00-13:59	31.5159	0.0963073	0.0343587	7.48466	2	243.45	8.87186	236.291	3.04841	2.803
2001	05	May	2001-05-10	14:33:00	14:00-14:59	33.2889	0.112839	0.034946	4.72697	4	385.35	10.0286	312.852	22.5307	3.22895
2001	05	May	2001-05-11	09:17:00	09:00-09:59	29.434	0.0882793	0.0277501	9.10539	2	243.45	7.4964	221.466	101.583	3.18123
2001	05	May	2001-05-11	10:02:00	10:00-10:59	30.2494	0.0982163	0.0267624	4.09353	4	385.35	12.3897	317.065	63.6274	3.66994
2001	05	May	2001-05-11	11:16:00	11:00-11:59	32.3747	0.10909	0.0373854	3.73172	1	172.5	18.9259	203.126	5.00739	2.91798
2001	05	May	2001-05-11	11:19:00	11:00-11:59	31.5381	0.111525	0.0286789	10.7832	1	172.5	8.11372	237.707	69.5658	3.88875
2001	05	May	2001-05-11	11:31:00	11:00-11:59	31.5444	0.106851	0.0312583	9.82311	1	172.5	7.50743	243.151	97.7108	3.41835
2001	05	May	2001-05-11	11:31:00	11:00-11:59	34.8382	0.125709	0.0723536	6.71466	2	243.45	10.0449	272.857	175.278	1.73742
2001	05	May	2001-05-11	11:32:00	11:00-11:59	41.4475	0.173151	0.0541448	2.84629	5	456.3	11.4653	244.7	31.3585	3.19793
2001	05	May	2001-05-11	13:05:00	13:00-13:59	41.4023	0.18481	0.0557063	2.3582	4	385.35	17.0254	298.261	152.306	3.31758
2001	05	May	2001-05-12	10:02:00	10:00-10:59	28.2059	0.0907668	0.0266733	6.31053	1	172.5	11.2364	196.845	174.404	3.40291
2001	05	May	2001-05-12	11:46:00	11:00-11:59	32.6364	0.125652	0.0346766	10.6606	1	172.5	7.73873	218.764	155.532	3.62353
2001	05	May	2001-05-12	14:35:00	14:00-14:59	29.7664	0.10338	0.0259337	7.24617	1	172.5	9.67706	30.0317	37.6701	3.98633
2001	05	May	2001-05-12	14:50:00	14:00-14:59	41.9353	0.188801	0.0524566	7.09232	2	243.45	9.17807	235.408	77.5945	3.59919
2001	05	May	2001-05-13	10:32:00	10:00-10:59	32.7909	0.111854	0.0311227	15.9904	3	314.4	3.52395	200.763	150.957	3.59398
2001	05	May	2001-05-13	13:17:00	13:00-13:59	33.2543	0.116168	0.0320342	4.71757	5	456.3	8.86577	277.214	156.312	3.62637
2001	05	May	2001-05-15	13:01:00	13:00-13:59	27.174	0.0685444	0.0282259	3.31685	6	527.25	11.2992	51.532	47.6959	2.42843
2001	05	May	2001-05-18	13:02:00	13:00-13:59	28.3207	0.0895121	0.0224288	4.52659	4	385.35	11.2326	344.281	97.6848	3.99095
2001	05	May	2001-05-18	14:04:00	14:00-14:59	37.4692	0.143686	0.0438451	6.07127	1	172.5	14.2206	138.149	119.849	3.27712
2001	05	May	2001-05-20	10:05:00	10:00-10:59	25.536	0.0688831	0.0192868	19.0364	1	172.5	4.74346	305.08	121.391	3.57151
2001	05	May	2001-05-20	13:16:00	13:00-13:59	29.3349	0.0913178	0.0244577	9.39028	4	385.35	4.52821	138.876	77.5065	3.7337
2001	05	May	2001-05-22	14:18:00	14:00-14:59	26.6601	0.0643953	0.0313092	6.95741	1	172.5	13.025	305.772	126.158	2.05675
2001	05	May	2001-05-23	10:34:00	10:00-10:59	27.5981	0.0838249	0.020801	7.01121	3	314.4	8.33094	229.374	175.224	4.02986
2001	05	May	2001-05-23	10:35:00	10:00-10:59	35.6532	0.13527	0.0360679	10.6617	2	243.45	6.22447	200.997	143.35	3.75043
2001	05	May	2001-05-23	12:17:00	12:00-12:59	35.8063	0.132194	0.0396969	22.6998	2	243.45	2.95612	316.711	76.1849	3.33009
2001	05	May	2001-05-23	13:01:00	13:00-13:59	41.4084	0.153986	0.0702017	4.05634	6	527.25	9.14647	259.08	41.1264	2.19348
2001	05	May	2001-05-23	13:46:00	13:00-13:59	35.7329	0.141837	0.0374811	5.76709	3	314.4	7.04879	255.18	56.1119	3.78423
2001	05	May	2001-05-26	10:16:00	10:00-10:59	29.4957	0.0969137	0.0241152	7.04069	3	314.4	8.18211	46.5985	98.5364	4.01878
2001	05	May	2001-05-26	10:17:00	10:00-10:59	38.4066	0.149277	0.0508755	12.7668	2	243.45	4.7941	55.0779	26.68	2.93416
2001	05	May	2001-05-26	11:04:00	11:00-11:59	30.4427	0.0978065	0.0257857	4.71771	3	314.4	12.061	83.3076	115.484	3.79306
2001	05	May	2001-05-26	12:03:00	12:00-12:59	32.5829	0.118925	0.0355469	6.56085	3	314.4	7.33084	78.6066	142.242	3.34558
2001	05	May	2001-05-26	13:33:00	13:00-13:59	25.0924	0.0623189	0.0206053	5.94517	2	243.45	11.8332	62.415	41.5976	3.02441
2001	05	May	2001-05-26	14:50:00	14:00-14:59	30.8616	0.0813346	0.0480582	10.0383	1	172.5	7.85981	80.9848	150.269	1.69242
2001	05	May	2001-05-30	09:18:00	09:00-09:59	26.96	0.0804156	0.025843	7.24205	1	172.5	9.98495	50.2814	95.7822	3.1117
2001	06	Jun	2001-06-06	12:05:00	12:00-12:59	27.7755	0.0809305	0.0208342	5.53518	2	243.45	12.0341	28.8181	137.612	3.8845
2001	06	Jun	2001-06-13	13:19:00	13:00-13:59	40.3324	0.167123	0.0559213	14.2119	2	243.45	4.60727	18.6933	42.3273	2.98854
2001	06	Jun	2001-06-19	12:17:00	12:00-12:59	39.2958	0.164902	0.0421591	4.97473	3	314.4	11.0875	51.8883	45.5204	3.91143
2001	06	Jun	2001-06-22	10:03:00	10:00-10:59	35.7392	0.137467	0.0355954	5.52967	3	314.4	10.0347	208.38	10.0168	3.86193
2001	06	Jun	2001-06-22	11:04:00	11:00-11:59	35.4054	0.113605	0.0606184	13.1297	1	172.5	5.62902	285.611	173.734	1.8741
2001	06	Jun	2001-06-23	12:49:00	12:00-12:59	28.5775	0.071912	0.0379638	5.66853	2	243.45	8.44904	234.098	12.077	1.89423
2001	06	Jun	2001-06-24	09:31:00	09:00-09:59	40.5767	0.202226	0.0521605	5.51475	5	456.3	7.5558	13.6949	12.1121	3.87699
2001	06	Jun	2001-06-24	09:48:00	09:00-09:59	30.5957	0.105553	0.0274559	2.39418	5	456.3	14.5637	297.04	140.842	3.84445
2001	06	Jun	2001-06-24	10:05:00	10:00-10:59	41.4557	0.21401	0.0598358	5.96823	5	456.3	7.07343	328.626	161.041	3.57662
2001	06	Jun	2001-06-24	10:31:00	10:00-10:59	31.7455	0.108093	0.0273482	5.17557	2	243.45	10.0449	309.431	160.982	3.95247
2001	06	Jun	2001-06-24	10:49:00	10:00-10:59	34.3406	0.11912	0.0431997	7.6661	2	243.45	8.7263	339.609	8.34636	2.75743
2001	06	Jun	2001-06-24	12:46:00	12:00-12:59	27.4506	0.0933153	0.0321621	3.97939	7	598.2	9.9055	264.535	135.441	2.9014
2001	06	Jun	2001-06-24	13:04:00	13:00-13:59	26.7915	0.0775702	0.0289345	4.68358	7	598.2	8.89457	288.24	147.941	2.68088
2001	06	Jun	2001-06-24	13:19:00	13:00-13:59	38.2158	0.140603	0.0540656	10.2875	1	172.5	8.3846	282.097	151.251	2.60061
2001	06	Jun	2001-06-24	14:01:00	14:00-14:59	27.4759	0.077352	0.0226034	4.6268	8	669.15	8.70568	306.527	128.717	3.42215
2001	06	Jun	2001-06-24	14:31:00	14:00-14:59	25.4032	0.0695083	0.0215047	13.3231	2	243.45	4.12502	93.0027	75.6339	3.23224
2001	06	Jun	2001-06-24	14:34:00	14:00-14:59	28.9211	0.0897415	0.0341711	4.22715	6	527.25	9.72549	309.359	95.1273	2.62624
2001	06	Jun	2001-06-25	09:01:00	09:00-09:59	33.7202	0.130115	0.0365277	2.96709	7	598.2	12.1073	308.683	178.718	3.56209
2001	06	Jun	2001-06-25	09:05:00	09:00-09:59	25.8796	0.0704789	0.018603	8.29994	2	243.45	8.44904	264.126	12.7823	3.78858
2001	06	Jun	2001-06-25	12:33:00	12:00-12:59	28.7077	0.0887223	0.0255449	5.06452	1	172.5	15.5087	314.68	141.581	3.4732
2001	06	Jun	2001-06-25	12:33:00	12:00-12:59	31.5773	0.10665	0.0261982	6.89293	2	243.45	9.7681	275.324	90.4597	4.0709
2001	06	Jun	2001-06-25	12:48:00	12:00-12:59	29.9641	0.0977444	0.0443666	6.22107	2	243.45	10.0449	286.384	144.453	2.20311
2001	06	Jun	2001-06-25	13:16:00	13:00-13:59	34.3854	0.12428	0.0357259	5.1288	4	385.35	9.51841	314.261	66.9809	3.4787
2001	06	Jun	2001-06-25	13:31:00	13:00-13:59	39.2876	0.195259	0.0605042	2.17907	10	811.05	14.5909	275.431	121.241	3.2272
2001	06	Jun	2001-06-25	13:49:00	13:00-13:59	29.8362	0.105806	0.0419599	3.24002	4	385.35	15.0471	261.595	102.361	2.5216
2001	06	Jun	2001-06-25	14:33:00	14:00-14:59	32.2132	0.115514	0.0601168	3.35956	3	314.4	15.8097	240.118	118.661	1.92149
2001	06	Jun	2001-06-26	09:19:00	09:00-09:59	32.6648	0.110992	0.0410115	1.81913	6	527.25	22.6087	256.745	156.462	2.70637
2001	06	Jun	2001-06-26	10:31:00	10:00-10:59	40.1016	0.19283	0.0545379	2.68498	5	456.3	15.8361	319.479	105.605	3.5357
2001	06	Jun	2001-06-26	11:05:00	11:00-11:59	33.3767	0.147833	0.0379372	2.85042	6	527.25	14.2299	82.3912	39.224	3.89678
2001	06	Jun	2001-06-26	11:34:00	11:00-11:59	25.6477	0.0691279	0.0371059	3.61062	6	527.25	11.6417	293.592	154.498	1.86299
2001	06	Jun	2001-06-26	12:50:00	12:00-12:59	34.533	0.110886	0.0733271	5.44011	2	243.45	12.4571	192.533	161.804	1.51221
2001	06	Jun	2001-06-26	13:03:00	13:00-13:59	31.7556	0.114029	0.0460622	2.91684	6	527.25	13.7214	284.512	135.492	2.47554
2001	06	Jun	2001-06-26	13:18:00	13:00-13:59	25.8714	0.0554484	0.0320305	7.03092	1	172.5	12.8034	270.153	56.7146	1.73111
2001	06	Jun	2001-06-26	13:33:00	13:00-13:59	39.8846	0.185803	0.0467927	3.38406	1	172.5	24.6875	192.66	80.3952	3.97076
2001	06	Jun	2001-06-26	13:46:00	13:00-13:59	27.7535	0.0927599	0.0257983	5.03806	3	314.4	11.4574	211.609	61.95	3.59559
2001	06	Jun	2001-06-26	14:35:00	14:00-14:59	28.1558	0.0891131	0.0255606	4.22325	4	385.35	11.8658	277.574	27.1503	3.48634
2001	07	Jul	2001-07-01	10:48:00	10:00-10:59	27.0457	0.0779157	0.0198849	5.8719	2	243.45	10.4393	70.9089	145.859	3.91834
2001	07	Jul	2001-07-01	11:18:00	11:00-11:59	30.2234	0.0909056	0.0296944	5.09298	2	243.45	13.2488	43.9226	62.7777	3.06137
2001	07	Jul	2001-07-01	11:18:00	11:00-11:59	38.4731	0.140274	0.0609699	7.51115	2	243.45	8.87186	76.0413	73.32	2.3007
2001	07	Jul	2001-07-01	12:17:00	12:00-12:59	28.4811	0.0829764	0.0239604	10.5895	2	243.45	6.45092	99.803	171.012	3.46306
2001	07	Jul	2001-07-01	12:17:00	12:00-12:59	33.8365	0.125015	0.0356907	3.91277	3	314.4	11.4574	76.3567	115.019	3.50274
2001	07	Jul	2001-07-01	12:18:00	12:00-12:59	40.7409	0.17834	0.045151	2.7756	4	385.35	13.5896	60.5377	32.0512	3.94986
2001	07	Jul	2001-07-01	12:19:00	12:00-12:59	34.9719	0.106406	0.0544873	11.0499	2	243.45	5.86423	68.4827	24.1831	1.95286
2001	07	Jul	2001-07-01	12:31:00	12:00-12:59	33.8798	0.108627	0.0495446	13.0347	1	172.5	6.61746	53.5545	168.442	2.1925
2001	07	Jul	2001-07-01	12:32:00	12:00-12:59	36.2523	0.129909	0.0462822	6.09081	5	456.3	6.51857	67.5642	84.171	2.80689
2001	07	Jul	2001-07-01	13:02:00	13:00-13:59	28.2234	0.0855312	0.0225108	6.13503	3	314.4	7.63641	83.6124	158.389	3.79957
2001	07	Jul	2001-07-01	13:20:00	13:00-13:59	27.3373	0.0839988	0.0218942	6.09885	1	172.5	13.025	73.736	101.694	3.83658
2001	07	Jul	2001-07-02	09:32:00	09:00-09:59	31.8787	0.121334	0.0384987	3.91772	3	314.4	13.5816	324.893	112.562	3.15165
2001	07	Jul	2001-07-02	09:33:00	09:00-09:59	26.4627	0.0814945	0.0242087	5.49033	3	314.4	9.68112	290.843	106.949	3.36634
2001	07	Jul	2001-07-02	09:35:00	09:00-09:59	30.8176	0.102369	0.0258768	7.51756	3	314.4	7.04879	306.385	128.328	3.956
2001	07	Jul	2001-07-02	10:31:00	10:00-10:59	33.4733	0.111814	0.0449395	4.58786	8	669.15	7.67735	11.4973	56.3967	2.4881
2001	07	Jul	2001-07-02	10:34:00	10:00-10:59	25.1939	0.0733159	0.0262405	3.74531	4	385.35	12.5747	296.565	126.404	2.794
2001	07	Jul	2001-07-02	11:04:00	11:00-11:59	34.4763	0.15328	0.0448163	5.41	4	385.35	8.77452	267.083	71.9408	3.42019
2001	07	Jul	2001-07-02	11:16:00	11:00-11:59	35.7102	0.134109	0.0358847	9.40832	3	314.4	5.94999	350.136	29.5219	3.7372
2001	07	Jul	2001-07-02	11:48:00	11:00-11:59	28.1334	0.0824118	0.0242363	12.1092	5	456.3	3.8655	250.33	69.9092	3.40034
2001	07	Jul	2001-07-02	13:04:00	13:00-13:59	40.5019	0.175091	0.0464456	6.93005	8	669.15	5.08143	339.575	172.352	3.7698
2001	07	Jul	2001-07-02	13:16:00	13:00-13:59	25.9525	0.0672529	0.0256517	4.54336	5	456.3	10.3901	258.319	75.7947	2.62177
2001	07	Jul	2001-07-02	13:48:00	13:00-13:59	30.7	0.102436	0.0276103	10.9895	1	172.5	7.98475	40.0429	61.9258	3.71007
2001	07	Jul	2001-07-02	13:50:00	13:00-13:59	30.2005	0.0997654	0.0243839	10.697	4	385.35	4.19026	326.401	103.264	4.09144
2001	07	Jul	2001-07-03	10:02:00	10:00-10:59	41.2337	0.174628	0.0815271	3.82833	4	385.35	11.3845	232.454	16.5347	2.14196
2001	07	Jul	2001-07-03	10:05:00	10:00-10:59	37.8996	0.144864	0.0493591	4.24949	3	314.4	12.061	272.909	121.963	2.9349
2001	07	Jul	2001-07-03	10:33:00	10:00-10:59	26.8187	0.0731024	0.0292078	7.65326	3	314.4	7.63641	41.4296	15.2643	2.50284
2001	07	Jul	2001-07-03	11:33:00	11:00-11:59	38.0058	0.143657	0.0479762	8.52532	2	243.45	7.6583	262.737	161.357	2.99433
2001	07	Jul	2001-07-03	13:32:00	13:00-13:59	33.3947	0.129114	0.0340334	3.21167	6	527.25	12.4938	284.055	84.4938	3.79374
2001	07	Jul	2001-07-03	14:03:00	14:00-14:59	36.5673	0.156415	0.0506142	3.30224	6	527.25	11.6417	279.043	65.1322	3.09034
2001	07	Jul	2001-07-04	09:03:00	09:00-09:59	31.562	0.124215	0.04194	1.98088	8	669.15	17.1087	245.597	1.63367	2.96174
2001	07	Jul	2001-07-04	11:35:00	11:00-11:59	34.2367	0.121158	0.0363026	4.24474	2	243.45	15.579	265.819	130.982	3.33744
2001	07	Jul	2001-07-04	13:32:00	13:00-13:59	27.4276	0.0974692	0.0239327	3.24572	7	598.2	12.4533	292.181	0.40926	4.07264
2001	07	Jul	2001-07-04	14:03:00	14:00-14:59	27.2912	0.082504	0.0264618	1.76009	6	527.25	19.5401	258.291	40.6016	3.11785
2001	07	Jul	2001-07-04	14:16:00	14:00-14:59	30.2098	0.106926	0.0302639	3.55556	4	385.35	14.043	265.557	164.302	3.53311
2001	07	Jul	2001-07-04	14:20:00	14:00-14:59	38.5486	0.194044	0.0568501	1.58936	8	669.15	19.9034	197.151	20.2513	3.41326
2001	07	Jul	2001-07-04	14:47:00	14:00-14:59	41.8771	0.230032	0.0616336	2.54185	7	598.2	14.1751	358.749	161.539	3.73226
2001	07	Jul	2001-07-05	09:34:00	09:00-09:59	38.654	0.146705	0.0790001	2.05287	8	669.15	16.8136	213.548	175.75	1.85702
2001	07	Jul	2001-07-05	09:49:00	09:00-09:59	38.5126	0.135267	0.0793953	5.73664	4	385.35	8.50853	93.4977	18.0398	1.70372
2001	07	Jul	2001-07-05	10:03:00	10:00-10:59	37.0369	0.188065	0.0469493	2.46638	7	598.2	13.6212	261.662	152.069	4.00571
2001	07	Jul	2001-07-05	12:47:00	12:00-12:59	28.3343	0.0910193	0.0231722	2.8804	3	314.4	16.0875	285.483	124.875	3.92795
2001	07	Jul	2001-07-05	13:17:00	13:00-13:59	27.1369	0.0795849	0.0259696	3.86506	5	456.3	12.091	239.36	148.383	3.06454
2001	07	Jul	2001-07-05	13:35:00	13:00-13:59	39.5725	0.189507	0.056864	2.14924	6	527.25	15.6827	266.162	132.206	3.33264
2001	07	Jul	2001-07-05	13:48:00	13:00-13:59	41.7202	0.202346	0.0591955	2.60273	7	598.2	13.6212	251.596	60.9011	3.41826
2001	07	Jul	2001-07-05	14:03:00	14:00-14:59	30.4489	0.104417	0.0321073	3.72026	3	314.4	15.1554	225.522	98.6187	3.25214
2001	07	Jul	2001-07-06	12:20:00	12:00-12:59	37.8855	0.155605	0.0381599	12.5834	3	314.4	4.40505	180.057	53.0585	4.0777
2001	07	Jul	2001-07-06	13:32:00	13:00-13:59	34.5387	0.132101	0.0395846	6.98172	3	314.4	7.89985	98.3105	161.157	3.33717
2001	07	Jul	2001-07-06	14:32:00	14:00-14:59	31.0807	0.102238	0.0402473	6.36384	2	243.45	10.5167	23.1722	153.747	2.54025
2001	07	Jul	2001-07-06	14:48:00	14:00-14:59	31.8222	0.0918328	0.0415367	17.1519	2	243.45	3.85595	300.427	100.158	2.21088
2001	07	Jul	2001-07-06	14:49:00	14:00-14:59	26.3842	0.0768721	0.019633	7.90711	7	598.2	5.28259	195.363	5.97435	3.91546
2001	07	Jul	2001-07-09	10:46:00	10:00-10:59	38.5178	0.156	0.0427315	10.8311	3	314.4	5.09039	31.8963	46.0663	3.65071
2001	07	Jul	2001-07-09	11:02:00	11:00-11:59	36.9545	0.1349	0.0443725	4.15009	6	527.25	9.54423	10.7934	80.7733	3.04017
2001	07	Jul	2001-07-12	10:47:00	10:00-10:59	39.2321	0.166826	0.0459124	8.54865	1	172.5	9.98495	30.9072	14.9509	3.63357
2001	07	Jul	2001-07-12	12:49:00	12:00-12:59	35.6817	0.137386	0.0386857	3.98575	4	385.35	10.8004	8.09108	97.5326	3.55135
2001	07	Jul	2001-07-12	13:49:00	13:00-13:59	38.9848	0.155428	0.0488976	3.26677	5	456.3	13.3008	301.864	69.7601	3.17865
2001	07	Jul	2001-07-12	14:05:00	14:00-14:59	38.124	0.157568	0.0390589	2.2038	6	527.25	18.2985	293.94	122.632	4.03411
2001	07	Jul	2001-07-12	14:16:00	14:00-14:59	34.8197	0.120603	0.0461183	2.54326	5	456.3	15.5885	50.2881	146.047	2.61508
2001	07	Jul	2001-07-13	11:02:00	11:00-11:59	32.7663	0.1135	0.029877	7.68679	3	314.4	7.27264	341.83	153.436	3.7989
2001	07	Jul	2001-07-13	11:03:00	11:00-11:59	36.3562	0.140092	0.0412994	5.29995	3	314.4	9.16449	6.55242	124.703	3.39211
2001	07	Jul	2001-07-13	11:31:00	11:00-11:59	25.815	0.0677738	0.0196964	7.89504	2	243.45	8.87186	60.5893	179.162	3.44092
2001	07	Jul	2001-07-13	11:33:00	11:00-11:59	29.2268	0.0820245	0.030584	3.67098	5	456.3	11.6666	4.36628	116.177	2.68194
2001	07	Jul	2001-07-13	12:32:00	12:00-12:59	40.6207	0.169459	0.0469576	4.72396	3	314.4	11.6518	61.4385	27.1106	3.60877
2001	07	Jul	2001-07-13	13:49:00	13:00-13:59	28.9996	0.0907295	0.0226647	8.05894	3	314.4	7.04879	35.3507	112.406	4.00313
2001	07	Jul	2001-07-13	13:49:00	13:00-13:59	36.7647	0.150209	0.0405796	4.1226	3	314.4	11.6518	13.7658	109.675	3.70159
2001	07	Jul	2001-07-14	14:47:00	14:00-14:59	40.9145	0.183044	0.0447599	6.49498	4	385.35	7.29272	125.419	164.66	4.08946
2001	07	Jul	2001-07-15	09:01:00	09:00-09:59	32.2025	0.109115	0.0378904	16.2065	1	172.5	4.83473	340.429	86.3228	2.87974
2001	07	Jul	2001-07-16	09:16:00	09:00-09:59	33.4071	0.121986	0.0300447	13.583	2	243.45	4.9273	185.896	28.0513	4.06015
2001	07	Jul	2001-07-16	11:48:00	11:00-11:59	34.5149	0.106635	0.0513209	17.6529	2	243.45	3.77389	187.4	40.5399	2.0778
2001	07	Jul	2001-07-16	14:16:00	14:00-14:59	36.534	0.137798	0.039973	15.1856	2	243.45	4.30005	251.16	98.6004	3.44729
2001	07	Jul	2001-07-16	14:16:00	14:00-14:59	38.5743	0.150416	0.0454649	10.6878	3	314.4	5.2061	243.402	83.8976	3.30839
2001	07	Jul	2001-07-17	09:05:00	09:00-09:59	41.4485	0.205138	0.0620423	2.25425	6	527.25	16.4674	270.759	46.1921	3.30642
2001	07	Jul	2001-07-17	09:17:00	09:00-09:59	40.8263	0.160792	0.0672569	7.79268	2	243.45	8.44904	276.387	164.614	2.39072
2001	07	Jul	2001-07-17	09:32:00	09:00-09:59	38.6346	0.167821	0.0538243	2.78907	9	740.1	12.2552	249.511	11.4825	3.11794
2001	07	Jul	2001-07-17	09:46:00	09:00-09:59	36.0881	0.157765	0.049636	3.55337	1	172.5	18.018	287.759	1.18685	3.17844
2001	07	Jul	2001-07-17	09:46:00	09:00-09:59	33.4081	0.118241	0.0433181	3.22077	3	314.4	16.6736	298.334	93.2104	2.72959
2001	07	Jul	2001-07-17	09:47:00	09:00-09:59	37.4106	0.155534	0.0533477	4.20133	5	456.3	9.92469	245.504	154.652	2.91548
2001	07	Jul	2001-07-17	10:01:00	10:00-10:59	35.0017	0.129718	0.0369949	3.7593	2	243.45	17.7673	297.803	101.328	3.50639
2001	07	Jul	2001-07-17	10:04:00	10:00-10:59	40.1055	0.175176	0.0433848	2.86289	2	243.45	19.1395	304.079	163.149	4.03774
2001	07	Jul	2001-07-17	10:31:00	10:00-10:59	38.2528	0.163344	0.0399463	2.26757	5	456.3	19.1896	262.739	81.8257	4.08908
2001	07	Jul	2001-07-17	10:34:00	10:00-10:59	37.1307	0.149888	0.0386596	2.63286	4	385.35	16.6466	286.09	65.0843	3.87713
2001	07	Jul	2001-07-17	10:46:00	10:00-10:59	37.4603	0.14691	0.037726	2.80332	3	314.4	18.7967	282.615	148.457	3.89414
2001	07	Jul	2001-07-17	10:46:00	10:00-10:59	27.6542	0.0746659	0.0380771	2.55956	4	385.35	19.718	302.718	143.385	1.96091
2001	07	Jul	2001-07-17	10:47:00	10:00-10:59	29.5875	0.0844917	0.0472982	4.70716	1	172.5	16.8089	311.363	147.379	1.78636
2001	07	Jul	2001-07-17	10:47:00	10:00-10:59	37.9656	0.178619	0.0489057	1.40429	8	669.15	24.799	293.49	109.859	3.65231
2001	07	Jul	2001-07-17	12:32:00	12:00-12:59	36.0312	0.134386	0.0370594	2.77571	6	527.25	14.4985	280.386	26.6529	3.62624
2001	07	Jul	2001-07-18	11:50:00	11:00-11:59	30.2178	0.107354	0.0275436	8.79453	4	385.35	5.505	192.24	44.88	3.8976
2001	07	Jul	2001-07-18	14:16:00	14:00-14:59	25.209	0.0682466	0.0191097	6.00578	4	385.35	8.13849	177.687	43.4485	3.5713
2001	07	Jul	2001-07-18	14:32:00	14:00-14:59	34.0859	0.122357	0.0342754	3.6428	8	669.15	9.37543	198.885	176.984	3.56982
2001	07	Jul	2001-07-18	14:46:00	14:00-14:59	31.8253	0.105879	0.0304724	5.03149	5	456.3	8.80705	136.737	96.7068	3.47459
2001	07	Jul	2001-07-20	09:19:00	09:00-09:59	28.0832	0.0743868	0.0424798	8.26198	6	527.25	5.262	310.429	24.0632	1.75111
2001	07	Jul	2001-07-20	10:18:00	10:00-10:59	26.0192	0.0745211	0.0264824	6.68884	6	527.25	6.51073	140.221	1.92083	2.81399
2001	07	Jul	2001-07-20	10:46:00	10:00-10:59	36.2833	0.133439	0.03992	9.31252	3	314.4	5.2061	95.2239	110.632	3.34267
2001	07	Jul	2001-07-20	10:50:00	10:00-10:59	38.689	0.159549	0.0419722	9.62765	2	243.45	6.69447	22.7128	81.3818	3.80129
2001	07	Jul	2001-07-20	10:50:00	10:00-10:59	25.2335	0.0699951	0.0183038	13.049	4	385.35	3.89924	114.981	32.6659	3.82407
2001	07	Jul	2001-07-20	10:50:00	10:00-10:59	32.0415	0.113256	0.0282499	5.9792	5	456.3	7.38786	74.9984	76.8594	4.00908
2001	07	Jul	2001-07-20	12:16:00	12:00-12:59	35.0497	0.125527	0.0447856	5.54604	1	172.5	13.2544	48.7344	69.1948	2.80285
2001	07	Jul	2001-07-20	12:19:00	12:00-12:59	32.5733	0.101163	0.0392867	5.79616	4	385.35	8.3194	40.3305	85.061	2.57499
2001	07	Jul	2001-07-20	12:46:00	12:00-12:59	38.0075	0.151528	0.0561457	20.9538	1	172.5	3.59109	29.6473	83.7709	2.69883
2001	07	Jul	2001-07-20	12:47:00	12:00-12:59	36.3854	0.14351	0.0351092	6.10941	4	385.35	7.29272	25.8465	38.1717	4.08753
2001	07	Jul	2001-07-20	12:48:00	12:00-12:59	30.6915	0.0906501	0.0350657	7.40023	5	456.3	6.27256	67.9254	74.5147	2.58515
2001	07	Jul	2001-07-20	13:16:00	13:00-13:59	33.8596	0.125041	0.0317418	3.52882	8	669.15	10.373	9.96374	89.2126	3.93931
2001	07	Jul	2001-07-20	13:19:00	13:00-13:59	28.0241	0.0757338	0.0287718	5.69954	4	385.35	8.91384	10.2836	3.22575	2.63223
2001	07	Jul	2001-07-20	13:46:00	13:00-13:59	41.0605	0.173583	0.0676849	5.29251	1	172.5	14.821	37.3318	81.9934	2.56458
2001	07	Jul	2001-07-20	13:46:00	13:00-13:59	39.1793	0.167638	0.0428653	3.88275	3	314.4	11.8529	13.5095	169.854	3.91081
2001	07	Jul	2001-07-20	13:47:00	13:00-13:59	34.8417	0.129789	0.0331146	4.77008	8	669.15	7.73829	31.1627	103.546	3.91938
2001	07	Jul	2001-07-20	13:48:00	13:00-13:59	33.7595	0.110896	0.0399075	5.68875	3	314.4	9.81951	345.252	124.6	2.77884
2001	07	Jul	2001-07-20	13:49:00	13:00-13:59	29.8432	0.0908039	0.033025	6.24024	3	314.4	6.88975	329.996	47.5393	2.74955
2001	07	Jul	2001-07-20	13:49:00	13:00-13:59	36.7694	0.128065	0.0509075	6.60034	3	314.4	8.4853	37.6842	123.293	2.51564
2001	07	Jul	2001-07-20	13:50:00	13:00-13:59	30.6383	0.0940727	0.0412859	5.60904	1	172.5	14.9473	3.31481	33.0724	2.27857
2001	07	Jul	2001-07-20	14:46:00	14:00-14:59	41.1285	0.1792	0.0445878	7.5931	2	243.45	8.58543	5.76678	112.194	4.01904
2001	07	Jul	2001-07-20	14:48:00	14:00-14:59	28.7699	0.0874996	0.0221742	3.16536	4	385.35	13.8126	6.94271	24.1134	3.94601
2001	07	Jul	2001-07-21	10:01:00	10:00-10:59	26.6581	0.0757081	0.0194973	7.12954	1	172.5	12.5893	130.068	131.149	3.88299
2001	07	Jul	2001-07-21	10:05:00	10:00-10:59	30.3069	0.098683	0.025396	6.11203	1	172.5	14.4548	260.169	71.6387	3.88577
2001	07	Jul	2001-07-21	10:31:00	10:00-10:59	37.2146	0.140822	0.0432274	4.74684	5	456.3	7.22723	4.36317	41.7912	3.25771
2001	07	Jul	2001-07-21	11:17:00	11:00-11:59	39.0608	0.161203	0.0417646	4.57395	3	314.4	11.2694	8.10087	11.4954	3.85981
2001	07	Jul	2001-07-21	12:47:00	12:00-12:59	34.3811	0.118167	0.0409142	9.2502	2	243.45	7.24127	74.6686	106.19	2.88816
2001	07	Jul	2001-07-21	13:32:00	13:00-13:59	27.8241	0.0740012	0.0300673	4.40262	1	172.5	16.2634	75.1343	39.9379	2.46118
2001	07	Jul	2001-07-22	11:17:00	11:00-11:59	25.5721	0.0740577	0.0260103	4.84515	5	456.3	9.29988	131.629	143.263	2.84724
2001	07	Jul	2001-07-22	11:50:00	11:00-11:59	33.918	0.119003	0.0347853	5.15021	5	456.3	8.05962	27.1624	33.4322	3.42108
2001	07	Jul	2001-07-23	09:01:00	09:00-09:59	27.1184	0.0763679	0.0266778	8.14769	7	598.2	5.03829	2.44912	169.163	2.8626
2001	07	Jul	2001-07-23	10:16:00	10:00-10:59	34.1479	0.13158	0.0426432	25.0252	2	243.45	2.68736	233.288	164.447	3.08561
2001	07	Jul	2001-07-23	11:03:00	11:00-11:59	34.0535	0.130361	0.0366752	9.20106	2	243.45	6.45092	96.5613	156.436	3.55447
2001	07	Jul	2001-07-23	11:04:00	11:00-11:59	37.6063	0.115912	0.0707884	9.04874	6	527.25	4.60028	2.10558	22.3583	1.63744
2001	07	Jul	2001-07-23	11:04:00	11:00-11:59	29.0501	0.0866359	0.042221	7.33563	7	598.2	5.58737	228.298	161.72	2.05196
2001	07	Jul	2001-07-23	11:18:00	11:00-11:59	30.308	0.0867848	0.0340572	17.3306	3	314.4	3.09533	17.9671	103.935	2.54821
2001	07	Jul	2001-07-23	11:32:00	11:00-11:59	29.8187	0.0909075	0.0335772	17.4518	2	243.45	3.94165	239.452	35.897	2.70742
2001	07	Jul	2001-07-23	12:17:00	12:00-12:59	31.7386	0.107711	0.0352149	3.4444	7	598.2	10.3773	43.4215	124.831	3.05867
2001	07	Jul	2001-07-23	12:18:00	12:00-12:59	38.7348	0.15237	0.0534505	21.4297	2	243.45	3.05807	51.3234	150.164	2.85067
2001	07	Jul	2001-07-23	12:20:00	12:00-12:59	30.2426	0.0944092	0.0284301	7.17348	6	527.25	5.90968	20.5027	31.7404	3.32075
2001	07	Jul	2001-07-23	12:31:00	12:00-12:59	34.3916	0.121446	0.0452936	13.7223	2	243.45	4.85979	73.5737	78.5947	2.68129
2001	07	Jul	2001-07-23	12:35:00	12:00-12:59	39.8117	0.165296	0.0518321	16.3379	2	243.45	4.03125	91.2479	10.9307	3.18906
2001	07	Jul	2001-07-23	12:48:00	12:00-12:59	33.1861	0.127967	0.0333812	12.11	1	172.5	6.39293	96.7635	143.05	3.83351
2001	07	Jul	2001-07-23	13:03:00	13:00-13:59	30.7715	0.108144	0.036414	11.4288	4	385.35	4.38669	38.8697	179.592	2.96986
2001	07	Jul	2001-07-23	14:18:00	14:00-14:59	28.7083	0.0890597	0.0417103	5.90334	8	669.15	6.67818	53.8681	97.4162	2.1352
2001	07	Jul	2001-07-23	14:31:00	14:00-14:59	37.4953	0.14745	0.042578	11.1835	1	172.5	7.50743	105.56	150.399	3.46305
2001	07	Jul	2001-07-23	14:31:00	14:00-14:59	38.3022	0.169839	0.0429753	30.5722	2	243.45	2.13691	181.148	33.0169	3.95202
2001	07	Jul	2001-07-23	14:33:00	14:00-14:59	40.7851	0.199736	0.0496494	5.60778	2	243.45	8.87186	66.8143	112.322	4.02293
2001	07	Jul	2001-07-23	14:47:00	14:00-14:59	25.6848	0.0831009	0.0207118	5.06631	6	527.25	8.00298	100.038	115.538	4.01224
2001	07	Jul	2001-07-23	14:49:00	14:00-14:59	27.3069	0.0899092	0.0233988	13.8844	3	314.4	4.16474	56.051	146.245	3.84247
2001	07	Jul	2001-07-24	09:01:00	09:00-09:59	30.0802	0.0936012	0.0302347	10.8227	5	456.3	4.26198	353.962	9.10828	3.09583
2001	07	Jul	2001-07-24	09:05:00	09:00-09:59	38.9767	0.162389	0.0529813	5.80376	3	314.4	7.38999	96.7277	149.533	3.06502
2001	07	Jul	2001-07-24	09:35:00	09:00-09:59	34.1804	0.10242	0.0634943	15.6564	1	172.5	5.38761	158.294	172.537	1.61306
2001	07	Jul	2001-07-24	09:47:00	09:00-09:59	26.2704	0.0726733	0.0202216	7.75034	2	243.45	8.7263	210.299	25.1033	3.59385
2001	07	Jul	2001-07-24	09:48:00	09:00-09:59	30.5387	0.0824738	0.0458484	8.71976	6	527.25	4.74227	137.864	64.993	1.79884
2001	07	Jul	2001-07-24	09:49:00	09:00-09:59	27.5763	0.0840163	0.0219502	7.63827	3	314.4	7.38999	122.14	0.15848	3.82759
2001	07	Jul	2001-07-24	10:02:00	10:00-10:59	31.1203	0.101328	0.0317501	25.3508	1	172.5	3.42004	113.426	42.214	3.19143
2001	07	Jul	2001-07-24	10:02:00	10:00-10:59	33.8037	0.108685	0.0594735	5.02038	4	385.35	9.05767	178.606	6.87408	1.82746
2001	07	Jul	2001-07-24	10:31:00	10:00-10:59	25.5605	0.072921	0.0274303	6.10522	6	527.25	7.24788	62.3691	160.357	2.65841
2001	07	Jul	2001-07-24	10:32:00	10:00-10:59	31.8988	0.120682	0.0299123	5.47703	4	385.35	8.50853	113.109	164.189	4.03454
2001	07	Jul	2001-07-24	10:35:00	10:00-10:59	29.4507	0.0836223	0.0359474	13.9478	2	243.45	4.9273	134.981	45.0915	2.32624
2001	07	Jul	2001-07-24	11:01:00	11:00-11:59	25.4738	0.0551137	0.0361582	7.16147	4	385.35	7.29272	57.4099	119.09	1.52424
2001	07	Jul	2001-07-24	11:01:00	11:00-11:59	41.6756	0.195987	0.054402	4.96291	4	385.35	8.13849	124.146	160.399	3.60257
2001	07	Jul	2001-07-24	11:03:00	11:00-11:59	33.508	0.126627	0.034956	2.37028	3	314.4	17.6375	83.0046	118.485	3.62246
2001	07	Jul	2001-07-24	11:03:00	11:00-11:59	27.1733	0.0832752	0.0213956	3.81634	5	456.3	10.7254	142.124	21.5579	3.89216
2001	07	Jul	2001-07-24	11:03:00	11:00-11:59	25.0914	0.0717089	0.0231947	4.86034	7	598.2	8.54572	179.915	18.0059	3.09161
2001	07	Jul	2001-07-24	11:03:00	11:00-11:59	30.3249	0.0999858	0.0273011	3.19165	8	669.15	11.3381	107.445	131.231	3.66233
2001	07	Jul	2001-07-24	11:05:00	11:00-11:59	34.5629	0.130034	0.0370302	12.0523	1	172.5	6.61746	112.796	3.80398	3.51156
2001	07	Jul	2001-07-24	11:16:00	11:00-11:59	35.1052	0.136764	0.0436429	9.64939	2	243.45	6.82328	123.413	16.6633	3.13371
2001	07	Jul	2001-07-24	11:16:00	11:00-11:59	31.0471	0.0920219	0.0566964	5.99688	3	314.4	9.54657	94.9886	38.2213	1.62306
2001	07	Jul	2001-07-24	11:31:00	11:00-11:59	37.4488	0.148151	0.0426901	5.69904	6	527.25	7.11364	51.047	120.831	3.47038
2001	07	Jul	2001-07-24	11:32:00	11:00-11:59	25.6607	0.0689637	0.0254957	9.41797	5	456.3	5.03694	82.1687	20.2401	2.70491
2001	07	Jul	2001-07-24	11:34:00	11:00-11:59	26.3665	0.0706876	0.0291562	5.85318	1	172.5	13.2544	55.4719	80.9246	2.42445
2001	07	Jul	2001-07-24	11:34:00	11:00-11:59	32.7858	0.113831	0.0322708	10.7094	2	243.45	6.33567	244.986	34.4494	3.52737
2001	07	Jul	2001-07-24	11:35:00	11:00-11:59	31.1275	0.0863823	0.0416038	8.46503	2	243.45	7.94425	61.5659	114.413	2.07631
2001	07	Jul	2001-07-24	11:46:00	11:00-11:59	28.4809	0.0846615	0.0258062	7.25954	6	527.25	6.00203	83.3728	25.2445	3.28067
2001	07	Jul	2001-07-24	11:47:00	11:00-11:59	38.9874	0.14864	0.0524046	5.4446	4	385.35	8.25821	106.582	15.3898	2.8364
2001	07	Jul	2001-07-24	11:48:00	11:00-11:59	39.4564	0.15618	0.0473818	6.29454	3	314.4	8.81182	116.917	168.237	3.2962
2001	07	Jul	2001-07-24	11:49:00	11:00-11:59	36.5994	0.141274	0.0366897	9.53026	3	314.4	5.45406	101.048	178.806	3.85051
2001	07	Jul	2001-07-24	11:49:00	11:00-11:59	39.2597	0.138841	0.0723065	6.48763	5	456.3	6.64896	79.8785	45.9373	1.92017
2001	07	Jul	2001-07-24	11:50:00	11:00-11:59	34.8769	0.124153	0.0487039	8.07198	2	243.45	8.2524	95.0102	94.561	2.54915
2001	07	Jul	2001-07-24	12:05:00	12:00-12:59	34.0961	0.118778	0.0391424	13.4288	1	172.5	6.50326	62.0793	2.69048	3.03452
2001	07	Jul	2001-07-24	12:05:00	12:00-12:59	30.4951	0.0993941	0.0404936	6.31829	6	527.25	6.4022	93.14	147.234	2.45456
2001	07	Jul	2001-07-24	13:31:00	13:00-13:59	29.1377	0.0921309	0.0271648	7.84584	4	385.35	6.10347	90.3501	161.44	3.39155
2001	07	Jul	2001-07-24	13:32:00	13:00-13:59	37.4414	0.14719	0.0402317	8.30142	5	456.3	5.11444	234.662	148.458	3.65857
2001	07	Jul	2001-07-24	13:46:00	13:00-13:59	38.7309	0.13693	0.0586225	10.8983	2	243.45	5.81615	48.7523	172.292	2.33579
2001	07	Jul	2001-07-24	14:02:00	14:00-14:59	25.9592	0.0688167	0.0205439	8.89635	1	172.5	9.53014	148.951	142.421	3.34973
2001	07	Jul	2001-07-24	14:17:00	14:00-14:59	37.7526	0.148185	0.0475028	5.43342	3	314.4	9.81951	114.615	104.77	3.1195
2001	07	Jul	2001-07-24	14:32:00	14:00-14:59	39.4925	0.192011	0.0500184	5.8558	3	314.4	9.16449	126.749	26.9943	3.8388
2001	07	Jul	2001-07-24	14:32:00	14:00-14:59	32.5597	0.113063	0.0440167	2.26841	6	527.25	14.2299	103.787	78.8858	2.56863
2001	07	Jul	2001-07-24	14:35:00	14:00-14:59	25.6834	0.0738438	0.0197204	8.48701	3	314.4	6.83831	110.197	6.33966	3.74453
2001	07	Jul	2001-07-24	14:46:00	14:00-14:59	37.8478	0.134639	0.0855682	12.4981	1	172.5	5.23786	92.5863	135.929	1.57347
2001	07	Jul	2001-07-24	14:47:00	14:00-14:59	34.541	0.120813	0.0477492	10.6746	3	314.4	4.97971	112.243	24.445	2.53016
2001	07	Jul	2001-07-24	14:47:00	14:00-14:59	32.9661	0.12132	0.032709	7.27469	6	527.25	5.44861	120.209	173.924	3.70906
2001	07	Jul	2001-07-24	14:48:00	14:00-14:59	32.1547	0.0967169	0.0398759	6.08966	5	456.3	7.22723	94.8569	160.154	2.42544
2001	07	Jul	2001-07-25	09:01:00	09:00-09:59	28.84	0.0944172	0.0234839	6.79911	5	456.3	6.27256	288.383	66.381	4.0205
2001	07	Jul	2001-07-25	09:16:00	09:00-09:59	27.2323	0.0860726	0.022337	10.6354	6	527.25	4.0117	210.868	152.258	3.85337
2001	07	Jul	2001-07-25	09:20:00	09:00-09:59	25.1964	0.0724186	0.0225042	8.70112	6	527.25	5.05428	231.992	103.076	3.21801
2001	07	Jul	2001-07-25	09:33:00	09:00-09:59	36.4541	0.147162	0.0361362	11.0438	1	172.5	7.11744	290.563	78.7543	4.07243
2001	07	Jul	2001-07-25	09:46:00	09:00-09:59	33.0411	0.118707	0.0324165	15.1325	3	314.4	3.69448	224.944	10.8825	3.66193
2001	07	Jul	2001-07-25	10:02:00	10:00-10:59	27.2251	0.0813115	0.0233197	10.8984	4	385.35	3.98221	233.686	81.9734	3.48682
2001	07	Jul	2001-07-25	10:31:00	10:00-10:59	25.1094	0.0704289	0.0222314	13.7601	1	172.5	6.50326	256.905	40.5241	3.16799
2001	07	Jul	2001-07-25	10:46:00	10:00-10:59	38.299	0.178377	0.0440392	5.83871	7	598.2	6.05301	319.132	144.396	4.05042
2001	07	Jul	2001-07-25	11:46:00	11:00-11:59	40.0435	0.208052	0.0509545	6.07502	6	527.25	6.4022	116.845	24.229	4.08309
2001	07	Jul	2001-07-25	11:48:00	11:00-11:59	27.2853	0.0767537	0.0264101	14.8893	1	172.5	5.89308	219.019	2.96847	2.90622
2001	07	Jul	2001-07-25	12:03:00	12:00-12:59	25.47	0.0690023	0.019905	11.7635	2	243.45	5.91312	283.522	71.9265	3.46658
2001	07	Jul	2001-07-25	12:33:00	12:00-12:59	31.8917	0.105392	0.0303022	4.12436	6	527.25	9.97816	278.124	90.7058	3.47803
2001	07	Jul	2001-07-25	12:34:00	12:00-12:59	39.741	0.188092	0.0499508	5.24575	3	314.4	8.81182	256.5	23.7013	3.76555
2001	07	Jul	2001-07-25	12:34:00	12:00-12:59	28.1571	0.0823847	0.0352494	8.16103	4	385.35	6.23912	333.013	162.044	2.33719
2001	07	Jul	2001-07-25	12:48:00	12:00-12:59	32.4815	0.113899	0.0326346	10.4366	2	243.45	6.33567	248.537	19.504	3.49013
2001	07	Jul	2001-07-25	13:19:00	13:00-13:59	27.8928	0.0800404	0.0345203	7.9622	1	172.5	9.82859	243.168	79.5293	2.31865
2001	07	Jul	2001-07-25	13:19:00	13:00-13:59	37.9181	0.169702	0.0673763	5.54675	3	314.4	9.81951	297.744	135.411	2.51872
2001	07	Jul	2001-07-25	13:19:00	13:00-13:59	32.9031	0.119429	0.038866	7.28932	3	314.4	6.3633	259.033	56.1006	3.07284
2001	07	Jul	2001-07-25	14:20:00	14:00-14:59	37.5409	0.113807	0.0710156	7.81749	3	314.4	6.94196	276.573	98.8597	1.60256
2001	07	Jul	2001-07-26	09:16:00	09:00-09:59	27.3002	0.0709699	0.033514	8.45449	5	456.3	5.36194	48.1529	94.7933	2.11762
2001	07	Jul	2001-07-26	09:17:00	09:00-09:59	40.7337	0.193447	0.0530239	4.2656	10	811.05	7.57545	30.1332	130.484	3.64831
2001	07	Jul	2001-07-26	09:20:00	09:00-09:59	26.7906	0.0740276	0.0324321	40.711	1	172.5	2.20486	26.3713	20.6846	2.28254
2001	07	Jul	2001-07-26	10:03:00	10:00-10:59	32.4141	0.112019	0.0382151	9.05439	6	527.25	4.62799	55.1445	5.1202	2.93126
2001	07	Jul	2001-07-26	10:33:00	10:00-10:59	25.398	0.0755904	0.019985	8.6584	6	527.25	5.08775	28.0185	3.21665	3.78235
2001	07	Jul	2001-07-26	10:46:00	10:00-10:59	38.6593	0.146094	0.0584328	26.6691	2	243.45	2.38073	122.873	81.9909	2.50021
2001	07	Jul	2001-07-26	10:47:00	10:00-10:59	30.0227	0.097034	0.0241228	13.079	2	243.45	3.61983	153.285	149.393	4.02251
2001	07	Jul	2001-07-26	10:48:00	10:00-10:59	28.721	0.0921324	0.0285786	8.20667	2	243.45	7.77017	316.916	104.468	3.22382
2001	07	Jul	2001-07-26	11:03:00	11:00-11:59	41.9439	0.198676	0.0530482	17.9539	1	172.5	4.65558	128.991	143.896	3.7452
2001	07	Jul	2001-07-26	11:20:00	11:00-11:59	34.2909	0.128333	0.034299	10.2539	2	243.45	6.57044	118.78	27.344	3.74159
2001	07	Jul	2001-07-26	11:31:00	11:00-11:59	30.9382	0.0999483	0.029083	8.90065	5	456.3	5.03694	262.635	64.6567	3.43665
2001	07	Jul	2001-07-26	11:31:00	11:00-11:59	27.7652	0.08473	0.0220082	8.91588	5	456.3	4.81793	323.258	46.637	3.84992
2001	07	Jul	2001-07-26	11:34:00	11:00-11:59	38.8241	0.165506	0.0441974	8.76863	5	456.3	4.96176	335.133	143.694	3.74469
2001	07	Jul	2001-07-26	11:35:00	11:00-11:59	40.7685	0.160205	0.0590287	9.02865	3	314.4	6.06823	274.314	81.7465	2.71402
2001	07	Jul	2001-07-26	11:35:00	11:00-11:59	28.7048	0.0894874	0.0278572	6.15599	8	669.15	6.33124	140.748	75.3921	3.21236
2001	07	Jul	2001-07-26	11:47:00	11:00-11:59	31.6328	0.0913638	0.0408603	4.60851	6	527.25	8.93372	191.425	143.909	2.23601
2001	07	Jul	2001-07-26	11:48:00	11:00-11:59	37.962	0.152802	0.0400639	25.253	1	172.5	3.39693	130.872	129.056	3.81396
2001	07	Jul	2001-07-26	11:50:00	11:00-11:59	29.8221	0.0879642	0.0305667	5.33077	7	598.2	7.38685	309.779	133.458	2.87778
2001	07	Jul	2001-07-26	11:50:00	11:00-11:59	34.4987	0.128519	0.0325771	3.21923	11	882	10.6213	0.539525	27.0218	3.94507
2001	07	Jul	2001-07-26	12:17:00	12:00-12:59	28.8412	0.0802842	0.0311305	17.2327	2	243.45	3.94165	10.6591	72.4628	2.57896
2001	07	Jul	2001-07-26	12:17:00	12:00-12:59	38.6092	0.157784	0.0445823	6.70865	6	527.25	5.90968	0.893527	17.1635	3.53916
2001	07	Jul	2001-07-26	12:18:00	12:00-12:59	26.4271	0.0791001	0.0233679	21.3749	1	172.5	4.18983	45.8676	134.359	3.38499
2001	07	Jul	2001-07-26	12:32:00	12:00-12:59	40.6192	0.177156	0.0485251	4.68576	4	385.35	9.05767	359.037	162.971	3.65081
2001	07	Jul	2001-07-26	12:34:00	12:00-12:59	36.0181	0.140824	0.0379209	4.26131	6	527.25	7.11364	152.117	88.3324	3.71362
2001	07	Jul	2001-07-26	12:34:00	12:00-12:59	34.5737	0.114692	0.042576	6.08107	6	527.25	6.62299	338.697	122.131	2.69381
2001	07	Jul	2001-07-26	13:01:00	13:00-13:59	32.5071	0.105598	0.034077	3.54381	7	598.2	9.47475	340.689	140.596	3.09881
2001	07	Jul	2001-07-26	13:02:00	13:00-13:59	37.2649	0.144688	0.0479898	8.55362	4	385.35	5.01343	132.516	72.7036	3.01497
2001	07	Jul	2001-07-26	13:02:00	13:00-13:59	37.7189	0.149497	0.0417586	3.88384	6	527.25	8.73065	42.8788	71.4516	3.58002
2001	07	Jul	2001-07-26	13:16:00	13:00-13:59	35.722	0.122845	0.0452093	6.21122	6	527.25	6.62299	317.386	138.834	2.71726
2001	07	Jul	2001-07-26	13:16:00	13:00-13:59	30.7192	0.0963221	0.0284097	5.43278	7	598.2	7.38685	333.712	138.396	3.39047
2001	07	Jul	2001-07-26	13:32:00	13:00-13:59	40.1099	0.18197	0.0462574	6.79353	2	243.45	7.94425	328.669	39.7431	3.93386
2001	07	Jul	2001-07-26	13:32:00	13:00-13:59	32.3071	0.0932045	0.0441364	14.4469	3	314.4	3.9493	266.743	9.68623	2.11174
2001	07	Jul	2001-07-26	13:35:00	13:00-13:59	39.128	0.14771	0.0534419	6.30172	3	314.4	8.4853	8.76583	42.4223	2.76394
2001	07	Jul	2001-07-26	13:46:00	13:00-13:59	31.5949	0.103126	0.0311961	9.01173	2	243.45	7.4964	48.2506	37.9022	3.30572
2001	07	Jul	2001-07-26	13:46:00	13:00-13:59	36.8382	0.107364	0.07035	10.3901	3	314.4	5.45406	50.5039	6.61186	1.52614
2001	07	Jul	2001-07-26	13:46:00	13:00-13:59	35.4898	0.122537	0.0441962	8.39448	4	385.35	5.84912	206.13	115.401	2.77257
2001	07	Jul	2001-07-26	13:47:00	13:00-13:59	38.0228	0.14684	0.0505507	10.4182	1	172.5	7.98475	57.5175	61.4102	2.9048
2001	07	Jul	2001-07-26	13:47:00	13:00-13:59	40.4066	0.172881	0.047909	6.80884	2	243.45	9.50619	18.8251	140.841	3.60852
2001	07	Jul	2001-07-26	13:47:00	13:00-13:59	35.1375	0.12434	0.0421085	3.1007	5	456.3	11.4653	154.828	163.078	2.95285
2001	07	Jul	2001-07-26	13:47:00	13:00-13:59	33.6363	0.108817	0.0408134	7.23343	6	527.25	5.82014	202.329	146.95	2.66622
2001	07	Jul	2001-07-26	13:48:00	13:00-13:59	26.8036	0.0799946	0.0213108	6.16814	2	243.45	9.85865	46.2553	33.7233	3.75371
2001	07	Jul	2001-07-26	13:48:00	13:00-13:59	29.1058	0.0837286	0.0293854	7.22268	4	385.35	7.10805	338.087	137.308	2.84933
2001	07	Jul	2001-07-26	13:49:00	13:00-13:59	26.2617	0.0793537	0.0263591	8.25952	3	314.4	6.83831	116.279	160.116	3.01048
2001	07	Jul	2001-07-26	13:49:00	13:00-13:59	32.3439	0.103173	0.0368298	3.38095	6	527.25	11.3829	43.9387	173.307	2.80136
2001	07	Jul	2001-07-26	14:02:00	14:00-14:59	36.5665	0.12648	0.0486514	5.20369	3	314.4	10.4151	29.5822	10.5203	2.59971
2001	07	Jul	2001-07-26	14:02:00	14:00-14:59	30.5063	0.0904079	0.0325115	2.84611	4	385.35	13.5896	18.3669	31.8777	2.7808
2001	07	Jul	2001-07-26	14:02:00	14:00-14:59	38.6972	0.145174	0.0511099	5.89384	7	598.2	6.4091	350.211	134.426	2.84043
2001	07	Jul	2001-07-26	14:04:00	14:00-14:59	36.6641	0.140976	0.0427889	9.95035	1	172.5	7.39689	1.74618	76.6225	3.29469
2001	07	Jul	2001-07-26	14:16:00	14:00-14:59	30.1896	0.0934533	0.0296845	6.71563	4	385.35	7.58844	341.909	106.312	3.14822
2001	07	Jul	2001-07-26	14:18:00	14:00-14:59	40.5284	0.163927	0.0572842	7.08453	2	243.45	9.33925	5.15385	178.842	2.86165
2001	07	Jul	2001-07-26	14:19:00	14:00-14:59	35.4245	0.119266	0.0473783	5.4992	6	527.25	7.53215	40.461	53.9923	2.51731
2001	07	Jul	2001-07-26	14:33:00	14:00-14:59	32.9967	0.117101	0.0476472	2.80385	9	740.1	11.7223	64.8813	171.328	2.45766
2001	07	Jul	2001-07-26	14:35:00	14:00-14:59	35.2353	0.123472	0.0502966	25.9166	1	172.5	3.35162	319.794	67.739	2.45488
2001	07	Jul	2001-07-26	14:46:00	14:00-14:59	33.7519	0.130156	0.0394891	5.30276	5	456.3	6.3932	37.2514	106.445	3.29601
2001	07	Jul	2001-07-26	14:47:00	14:00-14:59	34.0232	0.103967	0.0479396	10.903	2	243.45	6.01338	346.604	123.404	2.16871
2001	07	Jul	2001-07-26	14:48:00	14:00-14:59	34.6935	0.13831	0.0373639	20.9038	1	172.5	3.26455	223.841	144.854	3.70171
2001	07	Jul	2001-07-26	14:48:00	14:00-14:59	32.0858	0.12337	0.0434994	6.0357	8	669.15	6.01857	121.269	116.378	2.83614
2001	07	Jul	2001-07-27	11:48:00	11:00-11:59	40.028	0.171885	0.043365	6.54415	5	456.3	5.54068	52.3793	32.4817	3.96368
2001	07	Jul	2001-07-27	12:18:00	12:00-12:59	35.4819	0.144346	0.0365765	8.43994	3	314.4	6.3633	94.7621	166.448	3.94642
2001	07	Jul	2001-07-27	12:20:00	12:00-12:59	41.6854	0.176856	0.0610928	4.89488	9	740.1	6.91276	151.377	105.432	2.89488
2001	07	Jul	2001-07-27	13:04:00	13:00-13:59	25.5642	0.0667585	0.0226152	8.27894	3	314.4	7.15897	193.89	110.072	2.95193
2001	07	Jul	2001-07-28	10:18:00	10:00-10:59	34.1262	0.125318	0.0388744	15.5609	2	243.45	4.30005	183.403	56.9936	3.22366
2001	07	Jul	2001-07-28	10:46:00	10:00-10:59	28.4879	0.0813403	0.0334288	17.7602	1	172.5	5.02823	249.202	176.346	2.43324
2001	07	Jul	2001-07-28	11:50:00	11:00-11:59	38.0216	0.160752	0.0455266	13.9025	2	243.45	4.76192	160.251	3.9715	3.53094
2001	07	Jul	2001-07-28	13:02:00	13:00-13:59	39.1425	0.150172	0.0566537	11.5319	2	243.45	5.63144	55.8855	25.0998	2.65069
2001	07	Jul	2001-07-28	13:18:00	13:00-13:59	29.1206	0.0729111	0.0450036	10.5294	1	172.5	6.61746	39.1959	72.0365	1.62012
2001	07	Jul	2001-07-28	13:34:00	13:00-13:59	26.789	0.0774535	0.0206078	18.9561	2	243.45	3.54743	179.064	171.054	3.75846
2001	07	Jul	2001-07-28	14:34:00	14:00-14:59	25.3049	0.064192	0.0204261	5.43251	5	456.3	7.38786	109.826	126.504	3.14265
2001	07	Jul	2001-07-28	14:35:00	14:00-14:59	34.0245	0.125814	0.0465789	7.68043	2	243.45	8.44904	199.865	9.04822	2.7011
2001	07	Jul	2001-07-29	09:18:00	09:00-09:59	34.1061	0.118508	0.0470307	9.78072	3	314.4	5.79933	90.9877	162.586	2.51981
2001	07	Jul	2001-07-29	09:20:00	09:00-09:59	37.3037	0.164803	0.0491392	5.9987	2	243.45	9.33925	52.5956	61.5491	3.35381
2001	07	Jul	2001-07-29	09:20:00	09:00-09:59	26.5101	0.0738853	0.0292478	7.38814	3	314.4	7.89985	77.0118	146.042	2.52618
2001	07	Jul	2001-07-29	09:20:00	09:00-09:59	38.7288	0.177957	0.0486886	3.41228	7	598.2	8.54572	92.4085	174.534	3.655
2001	07	Jul	2001-07-29	09:32:00	09:00-09:59	27.0136	0.080314	0.0205622	9.41009	3	314.4	5.79933	105.176	148.878	3.9059
2001	07	Jul	2001-07-29	09:34:00	09:00-09:59	28.0532	0.0936042	0.0238245	5.21486	1	172.5	14.4548	21.3071	17.8368	3.92891
2001	07	Jul	2001-07-29	09:34:00	09:00-09:59	31.6414	0.108962	0.0292605	4.55683	6	527.25	9.14647	90.3489	115.493	3.72385
2001	07	Jul	2001-07-29	09:35:00	09:00-09:59	25.013	0.0634226	0.0219163	12.2714	2	243.45	5.63144	316.579	172.232	2.89386
2001	07	Jul	2001-07-29	09:47:00	09:00-09:59	33.6538	0.108011	0.0432028	3.80651	4	385.35	10.4002	49.6751	84.129	2.50008
2001	07	Jul	2001-07-29	10:02:00	10:00-10:59	30.3436	0.0894104	0.0338183	5.52302	3	314.4	8.81182	45.3208	109.626	2.64385
2001	07	Jul	2001-07-29	10:18:00	10:00-10:59	25.9199	0.062103	0.0284932	6.19319	2	243.45	11.4509	153.326	64.6368	2.17957
2001	07	Jul	2001-07-29	10:18:00	10:00-10:59	33.9799	0.125723	0.0350814	4.75956	4	385.35	10.211	38.6374	63.2875	3.58375
2001	07	Jul	2001-07-29	10:20:00	10:00-10:59	30.4804	0.113428	0.0299271	4.44604	7	598.2	8.71666	21.9266	105.89	3.79014
2001	07	Jul	2001-07-29	10:32:00	10:00-10:59	35.5994	0.121173	0.0490676	4.9221	3	314.4	10.2595	26.6458	92.8886	2.46952
2001	07	Jul	2001-07-29	10:32:00	10:00-10:59	26.498	0.0836597	0.0291112	4.86207	4	385.35	10.4002	37.2961	5.32526	2.8738
2001	07	Jul	2001-07-29	10:34:00	10:00-10:59	32.2525	0.111952	0.0390232	3.76075	3	314.4	12.5001	18.2905	1.54471	2.86887
2001	07	Jul	2001-07-29	10:35:00	10:00-10:59	39.0627	0.148419	0.0801078	5.92615	3	314.4	8.64548	64.3293	100.495	1.85274
2001	07	Jul	2001-07-29	10:46:00	10:00-10:59	41.1865	0.17128	0.0537955	10.2615	2	243.45	6.33567	59.7278	148.424	3.18391
2001	07	Jul	2001-07-29	11:01:00	11:00-11:59	35.4478	0.123259	0.045239	5.38012	4	385.35	8.63948	33.8236	76.6872	2.72461
2001	07	Jul	2001-07-29	11:02:00	11:00-11:59	33.0783	0.110317	0.0358423	5.25461	9	740.1	6.91276	219.108	55.21	3.07785
2001	07	Jul	2001-07-29	11:03:00	11:00-11:59	25.0085	0.065783	0.0179614	7.02222	3	314.4	8.4853	60.0578	84.9569	3.66248
2001	07	Jul	2001-07-29	11:03:00	11:00-11:59	27.0508	0.0629689	0.0327416	6.24382	5	456.3	7.5558	7.40321	161.184	1.92321
2001	07	Jul	2001-07-29	11:04:00	11:00-11:59	34.4921	0.140385	0.0446716	7.8667	3	314.4	6.73772	23.8326	109.868	3.14261
2001	07	Jul	2001-07-29	11:04:00	11:00-11:59	30.5206	0.0925577	0.0320349	5.75101	5	456.3	8.05962	216.656	83.7404	2.88928
2001	07	Jul	2001-07-29	11:18:00	11:00-11:59	28.5885	0.0787475	0.0316641	2.44736	10	811.05	14.9604	5.22458	8.25338	2.48697
2001	07	Jul	2001-07-29	11:19:00	11:00-11:59	38.1742	0.153754	0.0393111	6.17587	2	243.45	10.4393	47.6255	63.1084	3.91122
2001	07	Jul	2001-07-29	11:19:00	11:00-11:59	36.7512	0.112262	0.0618216	4.56251	5	456.3	9.49922	49.6235	149.303	1.8159
2001	07	Jul	2001-07-29	11:19:00	11:00-11:59	41.9592	0.175958	0.0573747	5.07138	5	456.3	6.78468	21.2837	10.3101	3.06683
2001	07	Jul	2001-07-29	11:19:00	11:00-11:59	38.1409	0.150805	0.0478984	3.48191	6	527.25	10.6713	20.5586	167.182	3.14844
2001	07	Jul	2001-07-29	11:33:00	11:00-11:59	32.3219	0.112351	0.0300904	4.19026	4	385.35	11.3845	24.9353	158.378	3.73377
2001	07	Jul	2001-07-29	11:35:00	11:00-11:59	41.5936	0.161233	0.0661555	3.99849	3	314.4	11.4574	16.3664	112.083	2.43718
2001	07	Jul	2001-07-29	11:35:00	11:00-11:59	27.0902	0.0765805	0.0230158	2.94934	8	669.15	13.5433	6.07797	116.853	3.3273
2001	07	Jul	2001-07-29	11:47:00	11:00-11:59	40.0509	0.165079	0.0573714	7.684	2	243.45	8.31692	359.318	125.142	2.87738
2001	07	Jul	2001-07-29	11:47:00	11:00-11:59	41.6541	0.187762	0.0511883	2.79587	4	385.35	12.0355	8.51112	22.7465	3.66805
2001	07	Jul	2001-07-29	11:49:00	11:00-11:59	39.6423	0.171354	0.0438763	4.10014	1	172.5	19.7212	16.114	85.2616	3.90538
2001	07	Jul	2001-07-29	12:34:00	12:00-12:59	33.5804	0.119673	0.0440671	3.54681	4	385.35	13.1646	34.8147	160.986	2.71571
2001	07	Jul	2001-07-29	12:46:00	12:00-12:59	26.662	0.0795039	0.0259861	4.12834	1	172.5	17.7344	48.8811	98.1547	3.05948
2001	07	Jul	2001-07-29	12:48:00	12:00-12:59	25.3598	0.0676088	0.0191739	6.01488	4	385.35	8.3815	39.7257	104.563	3.52608
2001	07	Jul	2001-07-29	12:49:00	12:00-12:59	31.6294	0.0935658	0.0506617	6.63361	2	243.45	9.50619	42.0308	86.338	1.84688
2001	07	Jul	2001-07-29	13:01:00	13:00-13:59	30.4039	0.104733	0.0261685	7.51306	2	243.45	8.79848	28.8365	166.989	4.00226
2001	07	Jul	2001-07-29	13:02:00	13:00-13:59	32.8271	0.105218	0.0474798	7.66657	1	172.5	10.6636	58.8684	126.889	2.21605
2001	07	Jul	2001-07-29	13:03:00	13:00-13:59	34.8608	0.134168	0.0340643	5.46097	2	243.45	10.0449	17.7818	159.198	3.93868
2001	07	Jul	2001-07-29	13:17:00	13:00-13:59	27.4286	0.0815461	0.027053	5.94966	1	172.5	14.2206	27.3474	36.7132	3.01431
2001	07	Jul	2001-07-29	13:18:00	13:00-13:59	35.5942	0.148479	0.036736	4.93615	1	172.5	15.2063	23.0806	62.1785	4.04178
2001	07	Jul	2001-07-29	13:20:00	13:00-13:59	37.7791	0.162174	0.0407161	5.61797	3	314.4	9.81951	1.21124	120.484	3.98305
2001	07	Jul	2001-07-29	13:31:00	13:00-13:59	40.1723	0.16765	0.0560994	4.91949	2	243.45	13.4499	92.7802	27.9255	2.98845
2001	07	Jul	2001-07-29	13:31:00	13:00-13:59	31.2906	0.0955972	0.0406094	3.48937	6	527.25	12.1962	27.5764	2.18301	2.35406
2001	07	Jul	2001-07-29	13:31:00	13:00-13:59	28.2673	0.0820255	0.0247313	2.99959	6	527.25	12.1962	43.0718	43.03	3.31667
2001	07	Jul	2001-07-29	13:32:00	13:00-13:59	31.2353	0.0935932	0.0344313	4.0979	3	314.4	11.8529	40.116	39.4205	2.71826
2001	07	Jul	2001-07-29	13:32:00	13:00-13:59	40.5123	0.169162	0.053628	2.67642	3	314.4	16.8578	46.508	89.2345	3.15437
2001	07	Jul	2001-07-29	14:02:00	14:00-14:59	38.7249	0.150907	0.0539114	2.56777	4	385.35	15.605	46.1557	168.087	2.79918
2001	07	Jul	2001-07-29	14:03:00	14:00-14:59	25.1734	0.0614152	0.0244659	5.5982	1	172.5	16.0038	66.1403	59.5458	2.51024
2001	07	Jul	2001-07-29	14:03:00	14:00-14:59	32.4752	0.120045	0.0469178	3.84099	2	243.45	16.6533	51.6312	177.834	2.55862
2001	07	Jul	2001-07-29	14:03:00	14:00-14:59	36.0883	0.144264	0.0386353	3.64343	5	456.3	12.091	345.64	30.5072	3.73399
2001	07	Jul	2001-07-29	14:03:00	14:00-14:59	33.0484	0.104849	0.0399471	1.90912	10	811.05	17.3811	33.7183	27.0464	2.62469
2001	07	Jul	2001-07-29	14:16:00	14:00-14:59	36.3617	0.145308	0.036921	7.19708	1	172.5	9.60304	79.068	161.993	3.93564
2001	07	Jul	2001-07-29	14:20:00	14:00-14:59	26.5281	0.0779167	0.0236522	4.74533	5	456.3	9.92469	127.527	153.043	3.29427
2001	07	Jul	2001-07-29	14:32:00	14:00-14:59	35.8178	0.126677	0.0441339	3.33008	4	385.35	13.3737	39.2089	77.1467	2.8703
2001	07	Jul	2001-07-29	14:32:00	14:00-14:59	30.0532	0.0813326	0.0359234	3.73244	4	385.35	12.1221	28.5402	135.987	2.26406
2001	07	Jul	2001-07-29	14:34:00	14:00-14:59	32.25	0.105778	0.0332012	3.27994	4	385.35	13.5896	45.8194	84.6839	3.18595
2001	07	Jul	2001-07-29	14:34:00	14:00-14:59	31.2955	0.102823	0.0294297	2.93863	5	456.3	14.89	42.8357	40.1945	3.49385
2001	07	Jul	2001-07-29	14:35:00	14:00-14:59	31.5905	0.103895	0.0286518	3.87672	3	314.4	14.3254	75.2535	117.912	3.62613
2001	07	Jul	2001-07-29	14:48:00	14:00-14:59	29.5266	0.0954859	0.0236814	7.79788	1	172.5	10.3131	69.2946	142.243	4.03209
2001	07	Jul	2001-07-29	14:48:00	14:00-14:59	29.1967	0.0775916	0.0350418	5.15348	3	314.4	10.4151	50.1364	70.3332	2.21426
2001	07	Jul	2001-07-29	14:49:00	14:00-14:59	28.5226	0.100633	0.0320713	2.63893	6	527.25	14.4985	46.9132	99.0737	3.1378
2001	07	Jul	2001-07-29	14:50:00	14:00-14:59	34.717	0.136259	0.0357988	6.22368	1	172.5	13.7743	59.5369	97.286	3.80625
2001	07	Jul	2001-07-29	14:50:00	14:00-14:59	37.4478	0.148283	0.0446365	4.29502	5	456.3	10.2302	55.0856	176.516	3.32202
2001	07	Jul	2001-07-30	09:02:00	09:00-09:59	34.4923	0.117944	0.0392024	24.4865	2	243.45	2.72871	106.799	27.3651	3.00859
2001	07	Jul	2001-07-30	09:05:00	09:00-09:59	35.5772	0.136552	0.0333451	20.593	2	243.45	3.08466	82.4399	170.832	4.0951
2001	07	Jul	2001-07-30	09:05:00	09:00-09:59	27.0086	0.0783097	0.019141	9.6642	5	456.3	4.88879	183.132	0.456532	4.0912
2001	07	Jul	2001-07-30	09:20:00	09:00-09:59	36.6885	0.123988	0.0796531	9.1696	5	456.3	4.88879	84.7623	28.0552	1.55659
2001	07	Jul	2001-07-30	09:31:00	09:00-09:59	26.4701	0.0803634	0.02159	14.3514	4	385.35	3.59928	142.862	33.3787	3.72224
2001	07	Jul	2001-07-30	09:32:00	09:00-09:59	32.4916	0.119995	0.0315581	8.08416	5	456.3	5.44984	48.8	50.888	3.80236
2001	07	Jul	2001-07-30	09:34:00	09:00-09:59	29.9958	0.0959046	0.0252203	15.0074	1	172.5	5.54618	108.935	153.798	3.80267
2001	07	Jul	2001-07-30	09:46:00	09:00-09:59	35.7656	0.138581	0.0383036	18.5613	1	172.5	4.65558	226.951	176.18	3.61796
2001	07	Jul	2001-07-30	09:48:00	09:00-09:59	38.5621	0.155961	0.0451055	30.4939	2	243.45	2.17624	101.187	12.0365	3.45768
2001	07	Jul	2001-07-30	09:49:00	09:00-09:59	40.4661	0.188441	0.0518778	27.5461	1	172.5	3.06545	141.538	14.4437	3.6324
2001	07	Jul	2001-07-30	10:05:00	10:00-10:59	29.1128	0.0724401	0.0391834	18.8844	2	243.45	3.61983	41.8836	31.5857	1.84875
2001	07	Jul	2001-07-30	10:34:00	10:00-10:59	35.0725	0.125079	0.0531084	7.40873	3	314.4	5.32719	102.428	6.03652	2.35516
2001	07	Jul	2001-07-30	10:48:00	10:00-10:59	38.7622	0.158617	0.044727	12.4869	1	172.5	6.85834	33.1945	122.447	3.54634
2001	07	Jul	2001-07-30	10:48:00	10:00-10:59	27.7104	0.0900137	0.0235446	12.1467	1	172.5	5.4264	91.4335	159.682	3.82311
2001	07	Jul	2001-07-30	10:49:00	10:00-10:59	38.4529	0.164323	0.0406085	9.13903	1	172.5	7.85981	84.7843	119.143	4.04652
2001	07	Jul	2001-07-30	10:49:00	10:00-10:59	27.9239	0.0868385	0.0225398	10.5256	2	243.45	6.57044	74.4767	150.72	3.85267
2001	07	Jul	2001-07-30	10:50:00	10:00-10:59	31.486	0.110238	0.0318086	10.7589	2	243.45	6.11711	127.62	174.387	3.46566
2001	07	Jul	2001-07-30	11:19:00	11:00-11:59	25.9513	0.0761961	0.0211666	10.0522	1	172.5	7.98475	158.753	6.04672	3.59983
2001	07	Jul	2001-07-30	11:20:00	11:00-11:59	30.1615	0.106501	0.0272773	13.6332	1	172.5	6.39293	114.6	154.184	3.90438
2001	07	Jul	2001-07-30	11:32:00	11:00-11:59	35.0483	0.127061	0.0375466	11.1771	3	314.4	4.97971	45.3974	46.4342	3.38409
2001	07	Jul	2001-07-30	11:33:00	11:00-11:59	33.3641	0.118853	0.0332941	11.1327	4	385.35	4.45633	48.8132	21.2053	3.56978
2001	07	Jul	2001-07-30	11:34:00	11:00-11:59	41.0471	0.181603	0.0525499	6.2591	1	172.5	11.5289	104.217	142.462	3.45582
2001	07	Jul	2001-07-30	11:34:00	11:00-11:59	41.6349	0.181655	0.0480713	10.2793	2	243.45	5.7223	79.3745	69.1705	3.77886
2001	07	Jul	2001-07-30	11:34:00	11:00-11:59	38.8849	0.136185	0.0806741	12.1827	2	243.45	5.41643	108.125	168.82	1.68809
2001	07	Jul	2001-07-30	11:46:00	11:00-11:59	40.8812	0.154611	0.0726708	12.3711	2	243.45	5.29513	86.1018	130.357	2.12755
2001	07	Jul	2001-07-30	11:46:00	11:00-11:59	39.3904	0.172407	0.0456281	14.2999	3	314.4	3.81764	120.929	13.6159	3.77852
2001	07	Jul	2001-07-30	11:49:00	11:00-11:59	34.1355	0.106719	0.0507404	8.51645	3	314.4	6.2334	99.0901	11.4618	2.10323
2001	07	Jul	2001-07-30	12:02:00	12:00-12:59	29.4961	0.0830419	0.0326859	3.2274	5	456.3	9.92469	42.0466	37.1863	2.54061
2001	07	Jul	2001-07-30	12:03:00	12:00-12:59	28.2567	0.0640301	0.0413325	3.97912	7	598.2	9.07991	46.9796	41.0391	1.54915
2001	07	Jul	2001-07-30	12:05:00	12:00-12:59	32.7213	0.130394	0.0364143	7.87721	4	385.35	6.23912	78.4107	43.9628	3.58085
2001	07	Jul	2001-07-30	12:16:00	12:00-12:59	26.4101	0.0756484	0.0236894	15.1347	1	172.5	5.23786	138.375	23.5742	3.19334
2001	07	Jul	2001-07-30	12:17:00	12:00-12:59	26.0851	0.0665287	0.0273076	13.5539	1	172.5	6.50326	96.0692	136.102	2.43627
2001	07	Jul	2001-07-30	12:18:00	12:00-12:59	37.6868	0.136478	0.051315	7.9238	2	243.45	7.94425	91.8636	121.208	2.6596
2001	07	Jul	2001-07-30	12:18:00	12:00-12:59	28.6135	0.091917	0.025349	8.13361	5	456.3	5.6346	71.6002	21.2073	3.62606
2001	07	Jul	2001-07-30	12:20:00	12:00-12:59	30.5059	0.0983081	0.0246182	7.85191	2	243.45	8.31692	91.2707	90.0483	3.99331
2001	07	Jul	2001-07-30	12:34:00	12:00-12:59	28.276	0.0781571	0.032174	10.3672	5	456.3	4.55391	149.774	16.7064	2.4292
2001	07	Jul	2001-07-30	12:35:00	12:00-12:59	36.3745	0.141807	0.0371748	12.3544	1	172.5	6.98549	123.271	100.669	3.81461
2001	07	Jul	2001-07-30	12:46:00	12:00-12:59	41.6569	0.161568	0.0755278	7.93497	5	456.3	5.27682	87.0036	121.465	2.13919
2001	07	Jul	2001-07-30	12:47:00	12:00-12:59	25.6926	0.0668174	0.0224593	9.78285	3	314.4	5.79933	113.546	168.379	2.97504
2001	07	Jul	2001-07-30	12:49:00	12:00-12:59	25.8203	0.0751531	0.0206661	5.86919	5	456.3	7.22723	254.91	175.723	3.63655
2001	07	Jul	2001-07-30	12:50:00	12:00-12:59	39.5616	0.158225	0.050999	5.88642	5	456.3	7.22723	54.3736	20.5059	3.10251
2001	07	Jul	2001-07-30	13:02:00	13:00-13:59	33.3255	0.11824	0.033144	9.47976	3	314.4	5.94999	136.212	178.573	3.56747
2001	07	Jul	2001-07-30	13:04:00	13:00-13:59	28.9899	0.0894321	0.0271516	9.12949	1	172.5	9.38762	86.2743	72.9813	3.2938
2001	07	Jul	2001-07-30	13:04:00	13:00-13:59	38.8188	0.13018	0.071852	6.26326	6	527.25	6.4022	91.6657	168.747	1.81178
2001	07	Jul	2001-07-30	13:19:00	13:00-13:59	34.2867	0.115355	0.0420563	6.83852	4	385.35	6.10347	103.245	173.098	2.74288
2001	07	Jul	2001-07-30	13:31:00	13:00-13:59	25.1942	0.0675566	0.0188869	7.34017	1	172.5	11.9878	67.4865	48.2882	3.5769
2001	07	Jul	2001-07-30	13:35:00	13:00-13:59	27.6689	0.0846959	0.0297564	15.145	1	172.5	5.71437	85.0869	73.5724	2.8463
2001	07	Jul	2001-07-30	13:49:00	13:00-13:59	38.8533	0.162439	0.03994	12.6208	1	172.5	6.73575	87.5292	174.457	4.06708
2001	07	Jul	2001-07-30	14:03:00	14:00-14:59	41.8973	0.174736	0.0649249	6.84676	1	172.5	11.9878	82.8371	70.2813	2.69136
2001	07	Jul	2001-07-30	14:03:00	14:00-14:59	28.7569	0.0858825	0.0270795	7.96304	1	172.5	10.1464	83.7083	141.439	3.17149
2001	07	Jul	2001-07-30	14:04:00	14:00-14:59	30.1585	0.097116	0.0247976	7.83329	2	243.45	8.44904	82.1427	86.4213	3.91635
2001	07	Jul	2001-07-30	14:17:00	14:00-14:59	30.8758	0.0957671	0.0430465	3.84834	4	385.35	9.85253	79.2035	127.412	2.22474
2001	07	Jul	2001-07-30	14:19:00	14:00-14:59	41.1351	0.146325	0.0733981	4.9453	3	314.4	11.0875	53.8058	76.9659	1.99358
2001	07	Jul	2001-07-30	14:31:00	14:00-14:59	29.2508	0.0936404	0.0257337	9.65551	2	243.45	6.01338	39.4696	27.3883	3.63882
2001	07	Jul	2001-07-30	14:33:00	14:00-14:59	40.76	0.159736	0.0648298	17.5793	1	172.5	4.65558	64.5611	15.7104	2.46392
2001	07	Jul	2001-07-30	14:46:00	14:00-14:59	39.7196	0.142245	0.0641207	11.2281	3	314.4	4.97971	199.374	25.1507	2.2184
2001	07	Jul	2001-07-30	14:46:00	14:00-14:59	28.5505	0.087967	0.0217617	9.4798	6	527.25	4.34036	104.868	173.141	4.04228
2001	07	Jul	2001-07-31	09:03:00	09:00-09:59	28.6225	0.0929833	0.0285559	9.39678	3	314.4	4.97971	306.536	72.8452	3.25618
2001	07	Jul	2001-07-31	09:19:00	09:00-09:59	39.3412	0.159839	0.0447727	5.82738	2	243.45	10.5953	82.9998	108.429	3.57001
2001	07	Jul	2001-07-31	09:19:00	09:00-09:59	27.7593	0.0803228	0.0219144	11.0859	2	243.45	5.7223	93.8617	13.0686	3.6653
2001	07	Jul	2001-07-31	09:19:00	09:00-09:59	31.1731	0.0948012	0.0344121	5.03444	3	314.4	11.1777	80.4711	78.0733	2.75488
2001	07	Jul	2001-07-31	09:19:00	09:00-09:59	33.2929	0.128944	0.0351039	3.98124	7	598.2	9.68533	123.332	2.29992	3.6732
2001	07	Jul	2001-07-31	09:46:00	09:00-09:59	32.8412	0.0991593	0.0445822	7.95602	2	243.45	8.58543	350.129	165.627	2.22419
2001	07	Jul	2001-07-31	09:48:00	09:00-09:59	30.7206	0.108918	0.0270097	10.0443	1	172.5	8.24694	112.416	178.246	4.03254
2001	07	Jul	2001-07-31	10:02:00	10:00-10:59	32.6863	0.112747	0.0323963	18.443	1	172.5	4.74346	146.152	77.4067	3.48024
2001	07	Jul	2001-07-31	10:02:00	10:00-10:59	37.4408	0.151008	0.0376211	10.2076	3	314.4	5.45406	186.045	44.2129	4.01392
2001	07	Jul	2001-07-31	10:02:00	10:00-10:59	25.5364	0.0757853	0.0236212	4.33817	7	598.2	9.47475	108.905	23.3864	3.20836
2001	07	Jul	2001-07-31	10:05:00	10:00-10:59	41.9644	0.191783	0.0624048	9.64338	1	172.5	7.98475	88.6305	43.2066	3.07321
2001	07	Jul	2001-07-31	10:05:00	10:00-10:59	27.3638	0.0755977	0.0255335	9.36366	2	243.45	6.69447	93.8342	38.1235	2.96073
2001	07	Jul	2001-07-31	10:17:00	10:00-10:59	26.0989	0.077561	0.019785	5.18985	2	243.45	9.67921	113.462	20.3742	3.92019
2001	07	Jul	2001-07-31	10:46:00	10:00-10:59	40.3937	0.15082	0.0863005	6.10438	3	314.4	8.0385	112.731	149.675	1.74761
2001	07	Jul	2001-07-31	10:47:00	10:00-10:59	26.9824	0.079733	0.0239613	6.77704	4	385.35	6.97557	143.244	20.4827	3.32758
2001	07	Jul	2001-07-31	10:47:00	10:00-10:59	28.8494	0.0867835	0.0276024	8.99013	5	456.3	5.19436	301.065	33.6321	3.14405
2001	07	Jul	2001-07-31	10:49:00	10:00-10:59	26.5877	0.0726183	0.0198563	13.9292	1	172.5	6.08333	132.965	15.6808	3.6572
2001	07	Jul	2001-07-31	10:50:00	10:00-10:59	39.0339	0.153818	0.0548484	14.2864	2	243.45	4.4906	115.703	35.3669	2.80443
2001	07	Jul	2001-07-31	10:50:00	10:00-10:59	27.0779	0.0893683	0.0255944	5.62972	4	385.35	9.05767	30.6322	144.279	3.49171
2001	07	Jul	2001-07-31	11:03:00	11:00-11:59	38.3404	0.150374	0.0500614	7.69408	3	314.4	6.3633	141.608	6.80192	3.00378
2001	07	Jul	2001-07-31	11:05:00	11:00-11:59	41.7497	0.201282	0.0517311	7.81221	1	172.5	9.31794	110.251	145.238	3.89093
2001	07	Jul	2001-07-31	11:17:00	11:00-11:59	26.1762	0.0744715	0.0183429	8.29631	2	243.45	8.44904	197.199	36.8571	4.05997
2001	07	Jul	2001-07-31	11:20:00	11:00-11:59	27.4637	0.0764125	0.0244111	5.60079	5	456.3	7.73155	150.14	48.9286	3.13023
2001	07	Jul	2001-07-31	13:04:00	13:00-13:59	25.239	0.0736691	0.0226901	4.63506	6	527.25	8.73065	142.76	18.4865	3.24674
2001	07	Jul	2001-07-31	13:35:00	13:00-13:59	31.13	0.0864966	0.0563698	16.071	1	172.5	5.38761	112.364	125.901	1.53445
2001	07	Jul	2001-07-31	13:48:00	13:00-13:59	40.6254	0.176139	0.0606004	13.546	1	172.5	6.08333	182.28	162.584	2.90656
2001	07	Jul	2001-07-31	14:02:00	14:00-14:59	36.3434	0.130399	0.0575162	6.63883	2	243.45	9.67921	142.865	9.35432	2.26717
2001	07	Jul	2001-07-31	14:20:00	14:00-14:59	41.461	0.170234	0.0877305	8.12318	2	243.45	7.94425	157.639	1.25076	1.94042
2001	07	Jul	2001-07-31	14:31:00	14:00-14:59	39.6606	0.143015	0.0653165	20.3144	2	243.45	3.22489	188.993	35.1069	2.18958
2001	07	Jul	2001-07-31	14:47:00	14:00-14:59	29.11	0.0928461	0.0237381	5.71738	4	385.35	8.91384	81.2332	6.38197	3.91127
2001	08	Aug	2001-08-01	09:02:00	09:00-09:59	27.7189	0.0771606	0.0291843	6.67009	3	314.4	7.63641	286.904	167.469	2.64391
2001	08	Aug	2001-08-01	09:02:00	09:00-09:59	27.5113	0.0814143	0.0363153	8.7099	5	456.3	5.36194	289.13	5.20568	2.24188
2001	08	Aug	2001-08-01	09:05:00	09:00-09:59	25.2578	0.0679257	0.0176741	7.34229	3	314.4	7.63641	279.008	57.2433	3.84324
2001	08	Aug	2001-08-01	09:16:00	09:00-09:59	28.4339	0.0852173	0.025784	7.40146	1	172.5	11.7999	287.827	78.3833	3.30504
2001	08	Aug	2001-08-01	09:18:00	09:00-09:59	25.306	0.0744747	0.0201151	6.3568	2	243.45	10.363	279.993	140.861	3.70244
2001	08	Aug	2001-08-01	09:31:00	09:00-09:59	25.5564	0.0698874	0.0195496	8.4001	4	385.35	6.23912	269.513	77.8884	3.57488
2001	08	Aug	2001-08-01	09:48:00	09:00-09:59	27.4566	0.0823472	0.0208134	11.9656	2	243.45	5.81615	190.409	18.2709	3.95645
2001	08	Aug	2001-08-01	10:01:00	10:00-10:59	38.4642	0.162431	0.0422921	11.015	2	243.45	5.91312	223.413	31.876	3.8407
2001	08	Aug	2001-08-01	10:03:00	10:00-10:59	29.626	0.090348	0.0270521	9.77969	2	243.45	6.82328	298.272	96.2087	3.33978
2001	08	Aug	2001-08-01	10:04:00	10:00-10:59	26.0873	0.0812099	0.0198817	8.82939	4	385.35	5.84912	308.069	65.1497	4.08466
2001	08	Aug	2001-08-01	10:04:00	10:00-10:59	31.0659	0.110774	0.0317703	6.40458	4	385.35	7.79929	208.496	73.2593	3.48671
2001	08	Aug	2001-08-01	10:04:00	10:00-10:59	32.957	0.126516	0.0317613	3.73071	5	456.3	10.0751	251.864	50.2252	3.98333
2001	08	Aug	2001-08-01	10:05:00	10:00-10:59	29.9377	0.101788	0.0260683	10.5629	2	243.45	6.45092	296.016	69.1719	3.90466
2001	08	Aug	2001-08-01	10:16:00	10:00-10:59	25.6388	0.0744494	0.0242498	5.24032	4	385.35	9.85253	236.997	67.3076	3.07011
2001	08	Aug	2001-08-01	10:16:00	10:00-10:59	30.0319	0.101118	0.0248047	4.44804	5	456.3	10.2302	145.792	162.754	4.07655
2001	08	Aug	2001-08-01	10:16:00	10:00-10:59	32.1913	0.114262	0.0295322	3.49292	8	669.15	10.5985	255.823	83.0299	3.86907
2001	08	Aug	2001-08-01	10:19:00	10:00-10:59	37.0323	0.176366	0.052187	7.05901	3	314.4	6.94196	281.119	66.6327	3.3795
2001	08	Aug	2001-08-01	10:31:00	10:00-10:59	26.0519	0.0778067	0.0251053	3.9158	7	598.2	10.566	240.005	120.868	3.09921
2001	08	Aug	2001-08-01	10:32:00	10:00-10:59	25.6563	0.0586342	0.0269463	7.97577	3	314.4	7.45009	212.329	40.0887	2.17597
2001	08	Aug	2001-08-01	10:32:00	10:00-10:59	34.9935	0.126299	0.0424633	6.79635	3	314.4	7.27264	262.497	36.6885	2.9743
2001	08	Aug	2001-08-01	10:33:00	10:00-10:59	26.4107	0.0801223	0.0202277	9.03066	1	172.5	9.1482	290.938	78.0366	3.96103
2001	08	Aug	2001-08-01	10:33:00	10:00-10:59	41.7985	0.175921	0.0580361	7.53722	2	243.45	8.58543	268.732	54.1228	3.03124
2001	08	Aug	2001-08-01	10:34:00	10:00-10:59	38.3923	0.135274	0.0591057	3.72188	6	527.25	8.35099	296.03	92.0042	2.28869
2001	08	Aug	2001-08-01	10:35:00	10:00-10:59	32.3621	0.107433	0.0348771	5.60898	4	385.35	8.91384	343.694	74.6565	3.08033
2001	08	Aug	2001-08-01	10:35:00	10:00-10:59	25.4755	0.069748	0.0176237	8.70827	5	456.3	5.27682	322.037	97.4283	3.95762
2001	08	Aug	2001-08-01	10:46:00	10:00-10:59	38.1214	0.144492	0.0540178	4.18418	3	314.4	9.48069	289.714	106.72	2.6749
2001	08	Aug	2001-08-01	10:49:00	10:00-10:59	27.2564	0.0776491	0.0223893	6.42342	5	456.3	7.22723	238.231	56.0361	3.46814
2001	08	Aug	2001-08-01	11:32:00	11:00-11:59	37.8779	0.152104	0.0459407	6.92998	4	385.35	6.9325	250.818	78.8856	3.31088
2001	08	Aug	2001-08-01	11:34:00	11:00-11:59	36.6499	0.124263	0.0556895	9.93031	3	314.4	4.87374	320.947	20.8598	2.23136
2001	08	Aug	2001-08-01	11:34:00	11:00-11:59	26.306	0.0645328	0.029813	4.93235	6	527.25	8.93372	159.172	52.38	2.16458
2001	08	Aug	2001-08-01	11:35:00	11:00-11:59	41.2056	0.194658	0.0477027	7.94415	2	243.45	5.91312	232.382	178.383	4.08065
2001	08	Aug	2001-08-01	11:35:00	11:00-11:59	33.1823	0.124754	0.0309505	4.28507	4	385.35	11.3845	345.978	116.746	4.03077
2001	08	Aug	2001-08-01	11:35:00	11:00-11:59	26.6568	0.0813992	0.0230029	10.3464	4	385.35	4.75848	296.295	170.151	3.53865
2001	08	Aug	2001-08-01	11:49:00	11:00-11:59	39.5154	0.154702	0.0516583	8.14081	2	243.45	7.09636	286.121	115.719	2.99471
2001	08	Aug	2001-08-01	11:50:00	11:00-11:59	26.3904	0.0699527	0.0217894	7.23609	6	527.25	6.09731	328.179	147.122	3.2104
2001	08	Aug	2001-08-01	12:02:00	12:00-12:59	32.8483	0.109722	0.0329056	6.60707	2	243.45	10.0449	280.111	35.1793	3.33443
2001	08	Aug	2001-08-01	12:03:00	12:00-12:59	34.4279	0.120007	0.0386382	4.59808	6	527.25	8.73065	259.146	21.9261	3.10592
2001	08	Aug	2001-08-01	12:04:00	12:00-12:59	31.3434	0.0926483	0.04007	6.89345	5	456.3	6.64896	286.769	85.173	2.31216
2001	08	Aug	2001-08-01	12:04:00	12:00-12:59	31.5653	0.106315	0.0271192	3.80595	6	527.25	9.4853	283.013	87.9611	3.92029
2001	08	Aug	2001-08-01	12:05:00	12:00-12:59	36.5582	0.12691	0.0536068	10.1642	2	243.45	6.01338	263.482	96.5049	2.36742
2001	08	Aug	2001-08-01	12:16:00	12:00-12:59	41.9473	0.174621	0.0578482	10.3339	1	172.5	8.24694	314.997	100.131	3.01861
2001	08	Aug	2001-08-01	12:17:00	12:00-12:59	29.5574	0.0903719	0.0302308	11.0525	2	243.45	4.4906	229.767	174.738	2.9894
2001	08	Aug	2001-08-01	12:18:00	12:00-12:59	28.3954	0.0832866	0.0232835	5.33898	6	527.25	8.00298	273.825	117.002	3.57706
2001	08	Aug	2001-08-01	12:19:00	12:00-12:59	41.165	0.176959	0.0515393	9.98135	1	172.5	8.3846	295.314	91.6909	3.43348
2001	08	Aug	2001-08-01	12:32:00	12:00-12:59	32.7536	0.116423	0.0293812	10.6255	2	243.45	6.01338	239.217	59.7211	3.96251
2001	08	Aug	2001-08-01	12:47:00	12:00-12:59	35.8773	0.128263	0.0404006	6.992	6	527.25	5.82014	240.493	141.237	3.17479
2001	08	Aug	2001-08-01	12:47:00	12:00-12:59	28.0531	0.0900124	0.0227851	5.12866	6	527.25	8.35099	267.924	53.1104	3.9505
2001	08	Aug	2001-08-01	12:49:00	12:00-12:59	29.8687	0.0997546	0.0283385	6.09533	3	314.4	8.0385	241.522	41.1318	3.5201
2001	08	Aug	2001-08-01	12:50:00	12:00-12:59	33.3987	0.119225	0.0486417	17.3698	2	243.45	3.85595	270.772	29.9332	2.45108
2001	08	Aug	2001-08-01	12:50:00	12:00-12:59	37.664	0.124097	0.0595202	7.89174	3	314.4	7.04879	306.441	111.779	2.08495
2001	08	Aug	2001-08-01	13:01:00	13:00-13:59	30.4917	0.0978473	0.0303581	8.16634	2	243.45	6.82328	298.567	40.2783	3.2231
2001	08	Aug	2001-08-01	13:01:00	13:00-13:59	25.68	0.0564989	0.0307095	5.4296	3	314.4	9.16449	287.023	79.426	1.83979
2001	08	Aug	2001-08-01	13:02:00	13:00-13:59	31.9413	0.109095	0.0301005	8.40653	1	172.5	9.38762	272.124	66.5669	3.62436
2001	08	Aug	2001-08-01	13:02:00	13:00-13:59	34.3666	0.102509	0.0641509	11.1271	2	243.45	6.01338	301.358	95.5063	1.59793
2001	08	Aug	2001-08-01	13:02:00	13:00-13:59	25.472	0.0716876	0.0182634	4.94371	3	314.4	9.54657	279.335	47.89	3.92521
2001	08	Aug	2001-08-01	13:05:00	13:00-13:59	28.8797	0.0806781	0.0313374	6.11527	3	314.4	8.33094	330.197	6.94613	2.5745
2001	08	Aug	2001-08-01	13:16:00	13:00-13:59	33.2902	0.119874	0.0297201	6.13088	3	314.4	8.81182	277.257	80.1761	4.03345
2001	08	Aug	2001-08-01	13:16:00	13:00-13:59	33.0687	0.113794	0.0311703	7.92275	3	314.4	7.15897	339.252	119.569	3.65072
2001	08	Aug	2001-08-01	13:17:00	13:00-13:59	32.8903	0.10393	0.0388435	9.90202	2	243.45	6.69447	289.29	51.1162	2.67561
2001	08	Aug	2001-08-01	13:19:00	13:00-13:59	37.5923	0.157934	0.0401794	30.6109	1	172.5	2.32736	265.002	8.62005	3.93071
2001	08	Aug	2001-08-01	13:19:00	13:00-13:59	36.8611	0.135939	0.0480165	4.56541	4	385.35	10.0286	306.512	97.0692	2.83109
2001	08	Aug	2001-08-01	13:33:00	13:00-13:59	29.1576	0.0970808	0.023807	9.84247	1	172.5	8.6742	278.341	41.2414	4.07783
2001	08	Aug	2001-08-01	13:46:00	13:00-13:59	34.0514	0.11469	0.0374475	5.25058	3	314.4	7.89985	310.73	164.344	3.06268
2001	08	Aug	2001-08-01	13:46:00	13:00-13:59	29.6936	0.0873097	0.0309903	9.47659	3	314.4	5.6561	281.227	118.954	2.81732
2001	08	Aug	2001-08-01	13:47:00	13:00-13:59	29.9856	0.0824017	0.0364989	4.60896	3	314.4	9.81951	282.728	78.0382	2.25765
2001	08	Aug	2001-08-01	13:47:00	13:00-13:59	35.2796	0.130327	0.0401905	5.92286	4	385.35	7.58844	271.678	83.1761	3.24273
2001	08	Aug	2001-08-01	13:47:00	13:00-13:59	32.3372	0.104858	0.0362268	3.10716	10	811.05	11.8182	222.305	116.252	2.89448
2001	08	Aug	2001-08-01	13:48:00	13:00-13:59	28.8823	0.0773057	0.0474355	24.6901	1	172.5	3.46723	234.999	38.7603	1.6297
2001	08	Aug	2001-08-01	13:48:00	13:00-13:59	27.59	0.0826293	0.0209273	3.4427	6	527.25	11.4679	328.665	109.161	3.9484
2001	08	Aug	2001-08-01	13:50:00	13:00-13:59	34.571	0.105686	0.0518444	6.29767	8	669.15	6.0938	341.917	161.996	2.03853
2001	08	Aug	2001-08-01	14:02:00	14:00-14:59	25.4702	0.0748313	0.0195642	11.3832	5	456.3	4.02949	58.669	177.638	3.82492
2001	08	Aug	2001-08-01	14:04:00	14:00-14:59	29.5244	0.1012	0.0317732	6.04846	5	456.3	7.38786	256.323	34.2407	3.18508
2001	08	Aug	2001-08-01	14:17:00	14:00-14:59	40.046	0.171079	0.0505902	17.5585	1	172.5	4.74346	358.617	85.2508	3.38165
2001	08	Aug	2001-08-01	14:17:00	14:00-14:59	38.1683	0.143326	0.0515781	5.13157	6	527.25	7.68281	255.427	71.3542	2.77881
2001	08	Aug	2001-08-01	14:18:00	14:00-14:59	36.2532	0.138309	0.0391299	5.43457	5	456.3	8.10877	301.12	23.8437	3.53461
2001	08	Aug	2001-08-01	14:19:00	14:00-14:59	36.6459	0.122949	0.0551561	4.29755	5	456.3	8.41677	270.996	70.1172	2.22911
2001	08	Aug	2001-08-01	14:20:00	14:00-14:59	40.6868	0.164937	0.0647609	12.2278	2	243.45	5.06812	239.121	23.7577	2.54686
2001	08	Aug	2001-08-01	14:31:00	14:00-14:59	29.1975	0.0878256	0.0262991	17.9444	2	243.45	3.85595	268.783	47.2164	3.33949
2001	08	Aug	2001-08-01	14:33:00	14:00-14:59	28.6511	0.0927781	0.0261656	4.34281	7	598.2	8.89457	300.063	71.7451	3.5458
2001	08	Aug	2001-08-01	14:34:00	14:00-14:59	30.8731	0.095196	0.0304919	11.5799	2	243.45	5.81615	320.654	155.816	3.12201
2001	08	Aug	2001-08-01	14:34:00	14:00-14:59	39.2402	0.160439	0.0435262	13.3131	3	314.4	4.01859	308.032	101.166	3.68603
2001	08	Aug	2001-08-01	14:49:00	14:00-14:59	40.87	0.168838	0.0542844	7.96898	3	314.4	5.6561	287.858	74.7513	3.11025
2001	08	Aug	2001-08-02	09:01:00	09:00-09:59	28.6624	0.0845971	0.032698	3.06896	5	456.3	15.1157	272.138	76.9954	2.58723
2001	08	Aug	2001-08-02	09:04:00	09:00-09:59	35.671	0.132509	0.0588804	1.90287	6	527.25	21.3513	154.274	54.1667	2.25048
2001	08	Aug	2001-08-02	09:47:00	09:00-09:59	39.3246	0.176166	0.0486229	2.52379	5	456.3	15.8361	297.284	74.0923	3.6231
2001	08	Aug	2001-08-02	10:02:00	10:00-10:59	31.2993	0.105422	0.0276073	2.73666	6	527.25	14.4985	274.127	76.2327	3.81864
2001	08	Aug	2001-08-02	10:46:00	10:00-10:59	26.4399	0.073711	0.0225274	5.02995	5	456.3	9.29988	263.025	62.4097	3.27206
2001	08	Aug	2001-08-03	09:49:00	09:00-09:59	26.5425	0.0760079	0.0212304	8.03044	1	172.5	9.90615	51.0832	114.165	3.58014
2001	08	Aug	2001-08-03	12:19:00	12:00-12:59	39.6796	0.15372	0.0536542	3.78694	5	456.3	9.49922	339.886	89.791	2.86502
2001	08	Aug	2001-08-03	14:31:00	14:00-14:59	29.9454	0.0981265	0.0295656	3.17044	2	243.45	18.706	5.06941	34.7561	3.31894
2001	08	Aug	2001-08-04	10:48:00	10:00-10:59	32.7623	0.128517	0.0352693	4.89915	1	172.5	14.9473	59.4625	99.2922	3.64389
2001	08	Aug	2001-08-04	11:35:00	11:00-11:59	34.6974	0.113241	0.0433702	7.28189	3	314.4	7.7659	59.6286	162.477	2.61104
2001	08	Aug	2001-08-04	11:35:00	11:00-11:59	34.7358	0.102495	0.0554028	7.95214	5	456.3	5.73176	5.21515	63.9592	1.84999
2001	08	Aug	2001-08-04	12:03:00	12:00-12:59	31.7743	0.108024	0.0332816	7.45503	1	172.5	10.1464	10.665	26.3704	3.24575
2001	08	Aug	2001-08-04	12:20:00	12:00-12:59	35.097	0.131055	0.0373146	4.86731	4	385.35	9.20621	17.5999	166.897	3.51216
2001	08	Aug	2001-08-04	12:32:00	12:00-12:59	35.9525	0.136126	0.038542	3.95092	6	527.25	9.54423	204.927	151.893	3.53188
2001	08	Aug	2001-08-04	12:34:00	12:00-12:59	30.6988	0.0868197	0.037808	3.89108	4	385.35	10.5965	23.9093	76.2782	2.29633
2001	08	Aug	2001-08-04	12:35:00	12:00-12:59	25.2296	0.0508353	0.0334265	6.45492	5	456.3	7.22723	327.055	91.4746	1.52081
2001	08	Aug	2001-08-04	13:17:00	13:00-13:59	27.2661	0.0771073	0.0228544	9.39474	1	172.5	8.6742	1.92131	141.196	3.37385
2001	08	Aug	2001-08-04	13:17:00	13:00-13:59	41.7647	0.187787	0.0514755	4.0469	3	314.4	12.7318	52.6856	81.7148	3.64809
2001	08	Aug	2001-08-04	14:02:00	14:00-14:59	36.3493	0.131423	0.0431339	3.19372	7	598.2	12.1073	281.346	131.674	3.04685
2001	08	Aug	2001-08-04	14:35:00	14:00-14:59	30.6823	0.0987516	0.02633	5.99475	2	243.45	11.0926	13.285	157.883	3.75054
2001	08	Aug	2001-08-05	09:50:00	09:00-09:59	30.8713	0.106572	0.0370813	8.55232	2	243.45	7.60356	132.074	175.264	2.87402
2001	08	Aug	2001-08-05	09:50:00	09:00-09:59	25.4583	0.0680615	0.0197888	4.4896	4	385.35	10.0286	46.16	100.894	3.43939
2001	08	Aug	2001-08-05	12:18:00	12:00-12:59	28.4446	0.0827069	0.0239666	6.98694	2	243.45	9.85865	45.4372	99.8818	3.45092
2001	08	Aug	2001-08-05	12:31:00	12:00-12:59	38.5255	0.149649	0.0471146	4.08475	1	172.5	16.8089	82.6847	126.924	3.17628
2001	08	Aug	2001-08-05	12:47:00	12:00-12:59	34.0243	0.11022	0.0430784	2.53512	9	740.1	14.5743	67.95	26.7421	2.5586
2001	08	Aug	2001-08-05	13:19:00	13:00-13:59	39.7281	0.168481	0.0466227	2.72084	4	385.35	16.1669	55.5388	66.5167	3.61371
2001	08	Aug	2001-08-05	13:50:00	13:00-13:59	32.0094	0.105065	0.0319942	2.11426	10	811.05	15.9715	75.4661	98.0513	3.28386
2001	08	Aug	2001-08-05	14:16:00	14:00-14:59	31.1102	0.100873	0.0283058	2.70238	6	527.25	15.3689	70.1058	40.2196	3.56367
2001	08	Aug	2001-08-06	12:32:00	12:00-12:59	27.6901	0.0874935	0.0224722	1.58107	6	527.25	27.4615	16.8782	61.3987	3.89342
2001	08	Aug	2001-08-06	13:34:00	13:00-13:59	38.182	0.161784	0.0442764	5.43195	1	172.5	12.5893	73.4549	139.829	3.65395
2001	08	Aug	2001-08-08	10:50:00	10:00-10:59	32.6274	0.110219	0.0338702	7.02714	1	172.5	10.6636	96.7406	8.47721	3.25415
2001	08	Aug	2001-08-10	09:20:00	09:00-09:59	38.9365	0.161644	0.0529177	9.64966	1	172.5	7.85981	135.45	87.7198	3.05462
2001	08	Aug	2001-08-10	09:31:00	09:00-09:59	29.753	0.0971374	0.0247763	7.67739	1	172.5	10.3131	125.67	157.697	3.92058
2001	08	Aug	2001-08-10	09:34:00	09:00-09:59	27.1328	0.081528	0.0221755	6.58936	1	172.5	12.8034	134.36	2.10787	3.6765
2001	08	Aug	2001-08-10	10:01:00	10:00-10:59	39.7966	0.155831	0.0523692	7.98886	2	243.45	8.18887	78.2164	33.2045	2.97562
2001	08	Aug	2001-08-10	10:02:00	10:00-10:59	29.2795	0.0774664	0.0357696	8.60125	1	172.5	8.98455	42.6457	50.4743	2.16571
2001	08	Aug	2001-08-10	10:17:00	10:00-10:59	27.5606	0.0737041	0.0325626	4.98817	4	385.35	10.4002	100.484	176.978	2.26346
2001	08	Aug	2001-08-10	10:33:00	10:00-10:59	30.7529	0.0920242	0.0571688	4.21979	6	527.25	9.97816	132.121	148.3	1.60969
2001	08	Aug	2001-08-10	10:34:00	10:00-10:59	35.0502	0.136999	0.0396502	8.62319	1	172.5	9.2493	159.575	62.4557	3.45519
2001	08	Aug	2001-08-10	10:50:00	10:00-10:59	26.6896	0.0727204	0.0271362	10.1869	1	172.5	8.82664	106.535	97.6558	2.67983
2001	08	Aug	2001-08-10	11:03:00	11:00-11:59	29.2673	0.0980064	0.0309747	3.75242	1	172.5	22.4213	98.0747	102.891	3.16408
2001	08	Aug	2001-08-10	11:03:00	11:00-11:59	32.2247	0.118088	0.0289106	4.31916	2	243.45	12.0341	101.738	0.515273	4.08461
2001	08	Aug	2001-08-10	11:05:00	11:00-11:59	29.0501	0.0887475	0.0311695	7.01342	2	243.45	9.85865	84.0535	52.3293	2.84726
2001	08	Aug	2001-08-10	11:05:00	11:00-11:59	34.528	0.140699	0.0364608	3.02618	9	740.1	11.7223	199.339	155.432	3.85891
2001	08	Aug	2001-08-10	11:18:00	11:00-11:59	26.7169	0.0812304	0.0227045	8.28076	1	172.5	9.67706	83.4048	26.3711	3.57773
2001	08	Aug	2001-08-10	11:32:00	11:00-11:59	28.9846	0.0888022	0.0254021	5.22721	5	456.3	8.86577	80.7091	137.379	3.49586
2001	08	Aug	2001-08-10	11:46:00	11:00-11:59	27.1877	0.0811817	0.0211932	4.26321	1	172.5	18.6132	126.507	160.244	3.83056
2001	08	Aug	2001-08-10	11:46:00	11:00-11:59	41.87	0.182702	0.0677699	6.62341	3	314.4	7.51118	116.224	66.4347	2.69592
2001	08	Aug	2001-08-10	11:49:00	11:00-11:59	30.1147	0.0999835	0.0291922	7.0761	1	172.5	11.4413	77.6568	84.5754	3.42501
2001	08	Aug	2001-08-10	11:49:00	11:00-11:59	34.467	0.140573	0.0345024	10.49	2	243.45	5.54342	157.165	21.454	4.0743
2001	08	Aug	2001-08-10	12:31:00	12:00-12:59	33.3343	0.129673	0.0319974	7.08534	1	172.5	11.0387	113.385	18.3901	4.05262
2001	08	Aug	2001-08-10	12:34:00	12:00-12:59	28.1411	0.0702299	0.0465454	7.06086	2	243.45	9.85865	84.8545	33.3924	1.50885
2001	08	Aug	2001-08-10	13:01:00	13:00-13:59	25.3651	0.06788	0.0180005	5.55442	6	527.25	8.00298	191.231	176.28	3.771
2001	08	Aug	2001-08-10	13:18:00	13:00-13:59	41.8202	0.216789	0.0549094	3.68744	5	456.3	11.4653	99.4334	116.798	3.94812
2001	08	Aug	2001-08-10	13:20:00	13:00-13:59	40.2366	0.154262	0.0661883	5.40588	3	314.4	10.2595	3.9526	103.581	2.33065
2001	08	Aug	2001-08-10	13:31:00	13:00-13:59	41.9016	0.166849	0.0762623	4.28944	5	456.3	9.70729	181.288	5.03585	2.18783
2001	08	Aug	2001-08-10	13:34:00	13:00-13:59	36.5866	0.140452	0.0401053	4.94604	4	385.35	8.63948	91.5118	142.057	3.50209
2001	08	Aug	2001-08-10	13:48:00	13:00-13:59	36.5353	0.134884	0.0448689	4.1911	1	172.5	18.3107	120.165	144.446	3.00619
2001	08	Aug	2001-08-11	14:01:00	14:00-14:59	38.2044	0.166037	0.0421262	4.62745	1	172.5	14.6969	35.2021	121.726	3.94143
2001	08	Aug	2001-08-11	14:02:00	14:00-14:59	29.5812	0.0855439	0.0413933	5.73565	1	172.5	14.6969	2.73994	138.724	2.06662
2001	08	Aug	2001-08-13	11:03:00	11:00-11:59	37.8361	0.175411	0.043261	5.08644	1	172.5	16.8089	24.7477	30.8015	4.05472
2001	08	Aug	2001-08-13	11:04:00	11:00-11:59	34.0306	0.128446	0.0338794	6.74901	2	243.45	8.44904	53.116	53.075	3.79128
2001	08	Aug	2001-08-13	11:16:00	11:00-11:59	30.3913	0.103579	0.0259208	5.18876	2	243.45	11.7353	33.4381	66.1365	3.99598
2001	08	Aug	2001-08-13	11:16:00	11:00-11:59	28.6618	0.0848382	0.0250202	7.25274	2	243.45	8.44904	45.637	41.9879	3.39079
2001	08	Aug	2001-08-13	11:18:00	11:00-11:59	25.8548	0.0760147	0.0209607	6.48274	1	172.5	13.5615	78.6777	93.1052	3.62654
2001	08	Aug	2001-08-13	11:19:00	11:00-11:59	29.6449	0.106556	0.0305075	4.94783	1	172.5	13.2544	45.7644	32.384	3.49278
2001	08	Aug	2001-08-13	11:20:00	11:00-11:59	39.8134	0.156343	0.0586066	9.85428	1	172.5	6.98549	45.4518	86.1652	2.66767
2001	08	Aug	2001-08-13	12:02:00	12:00-12:59	29.4331	0.0835049	0.0356441	5.53681	1	172.5	14.9473	64.9525	147.6	2.34274
2001	08	Aug	2001-08-13	12:03:00	12:00-12:59	28.4675	0.101503	0.0287482	3.82209	1	172.5	21.4089	87.9386	83.4332	3.53077
2001	08	Aug	2001-08-13	12:05:00	12:00-12:59	25.9178	0.0730918	0.0194004	3.51269	4	385.35	14.5277	27.0887	98.4239	3.76753
2001	08	Aug	2001-08-13	12:20:00	12:00-12:59	37.9883	0.165039	0.0421957	4.27295	2	243.45	11.9328	59.5584	179.157	3.91127
2001	08	Aug	2001-08-13	12:31:00	12:00-12:59	27.2718	0.0791601	0.0249016	3.83853	1	172.5	20.037	66.1012	53.3495	3.17892
2001	08	Aug	2001-08-13	12:46:00	12:00-12:59	31.8029	0.113401	0.028389	4.00414	1	172.5	18.3107	82.1821	123.729	3.99453
2001	08	Aug	2001-08-13	12:46:00	12:00-12:59	28.1626	0.0838101	0.0277208	2.52853	5	456.3	17.2025	56.9265	121.543	3.02336
2001	08	Aug	2001-08-13	12:49:00	12:00-12:59	29.1431	0.0844538	0.0361852	4.33953	4	385.35	11.462	59.7587	131.071	2.33393
2001	08	Aug	2001-08-13	13:01:00	13:00-13:59	37.3545	0.173822	0.0472386	3.75014	1	172.5	20.037	56.3048	95.2952	3.67967
2001	08	Aug	2001-08-13	13:05:00	13:00-13:59	37.441	0.175547	0.0469691	3.15283	2	243.45	14.7981	107.651	171.779	3.7375
2001	08	Aug	2001-08-13	13:20:00	13:00-13:59	25.2602	0.069352	0.0202749	7.993	1	172.5	10.8479	69.5902	159.293	3.42058
2001	08	Aug	2001-08-13	13:33:00	13:00-13:59	40.8886	0.176953	0.0496385	4.35379	2	243.45	14.7981	49.9692	90.0901	3.56483
2001	08	Aug	2001-08-13	13:47:00	13:00-13:59	25.8402	0.0688693	0.0199018	10.8044	2	243.45	6.45092	35.7594	34.7934	3.46046
2001	08	Aug	2001-08-13	14:46:00	14:00-14:59	25.815	0.0684329	0.0196757	4.07823	4	385.35	12.3897	69.0607	118.458	3.47805
2001	08	Aug	2001-08-13	14:46:00	14:00-14:59	31.427	0.113403	0.0306882	4.53856	6	527.25	8.93372	32.3322	106.49	3.69535
2001	08	Aug	2001-08-13	14:48:00	14:00-14:59	41.6654	0.196055	0.0493245	3.58707	4	385.35	12.7654	71.5575	100.745	3.9748
2001	08	Aug	2001-08-14	10:01:00	10:00-10:59	41	0.158087	0.0657175	9.55197	2	243.45	6.95714	68.8078	126.819	2.40555
2001	08	Aug	2001-08-14	10:33:00	10:00-10:59	35.0258	0.124994	0.042041	3.18795	3	314.4	13.8907	14.5484	26.2528	2.97314
2001	08	Aug	2001-08-14	10:50:00	10:00-10:59	37.5774	0.143696	0.0485847	10.8635	1	172.5	7.85981	85.3615	155.078	2.95764
2001	08	Aug	2001-08-14	11:05:00	11:00-11:59	27.2111	0.0764882	0.024903	9.87273	1	172.5	8.82664	345.034	78.4171	3.07144
2001	08	Aug	2001-08-14	11:05:00	11:00-11:59	36.895	0.144539	0.036224	5.23124	3	314.4	10.6574	65.4885	48.6694	3.99016
2001	08	Aug	2001-08-14	11:16:00	11:00-11:59	27.1	0.0755416	0.0236436	4.01026	5	456.3	11.4653	7.88446	1.00047	3.19502
2001	08	Aug	2001-08-14	11:17:00	11:00-11:59	28.8244	0.0900652	0.0243028	4.829	3	314.4	10.7408	38.8049	93.3799	3.70596
2001	08	Aug	2001-08-14	11:18:00	11:00-11:59	39.1823	0.165316	0.0431228	8.59426	1	172.5	9.82859	3.28975	51.8382	3.83361
2001	08	Aug	2001-08-14	11:19:00	11:00-11:59	38.1399	0.153991	0.0407107	4.70914	4	385.35	10.211	306.686	45.0733	3.78257
2001	08	Aug	2001-08-14	11:32:00	11:00-11:59	26.0998	0.0696583	0.020975	5.13434	3	314.4	11.4574	8.89866	124.274	3.32102
2001	08	Aug	2001-08-14	11:34:00	11:00-11:59	35.662	0.132425	0.0362062	6.13322	3	314.4	8.81182	2.44934	101.353	3.65751
2001	08	Aug	2001-08-14	12:02:00	12:00-12:59	41.4976	0.15245	0.0844517	8.22649	1	172.5	9.38762	358.14	106.169	1.80517
2001	08	Aug	2001-08-14	12:05:00	12:00-12:59	27.2173	0.0757641	0.0263678	6.09535	1	172.5	12.3822	355.804	109.366	2.87336
2001	08	Aug	2001-08-14	12:05:00	12:00-12:59	37.5957	0.145134	0.0438022	2.97807	4	385.35	12.5747	331.063	107.476	3.3134
2001	08	Aug	2001-08-14	12:16:00	12:00-12:59	35.45	0.137478	0.0338928	5.01996	3	314.4	9.54657	38.2706	120.559	4.05626
2001	08	Aug	2001-08-14	12:18:00	12:00-12:59	33.8278	0.102548	0.0476208	3.93934	3	314.4	11.4574	30.7871	112.443	2.15343
2001	08	Aug	2001-08-14	12:31:00	12:00-12:59	35.5736	0.135656	0.0344266	7.75857	2	243.45	8.06471	40.6255	110.853	3.94045
2001	08	Aug	2001-08-14	12:48:00	12:00-12:59	39.6506	0.164908	0.0484876	6.19829	2	243.45	10.675	73.0497	144.837	3.40104
2001	08	Aug	2001-08-14	13:03:00	13:00-13:59	26.7373	0.0758075	0.0211581	4.57044	4	385.35	9.68259	27.2132	73.2754	3.5829
2001	08	Aug	2001-08-14	13:03:00	13:00-13:59	27.7352	0.0753915	0.0269265	4.07969	8	669.15	9.37543	30.2963	13.0461	2.7999
2001	08	Aug	2001-08-14	13:04:00	13:00-13:59	34.6994	0.114201	0.0472951	5.87647	3	314.4	8.33094	3.72507	90.5796	2.41464
2001	08	Aug	2001-08-14	13:05:00	13:00-13:59	27.6961	0.0728709	0.0277311	12.2076	1	172.5	6.98549	0.923585	47.8029	2.62777
2001	08	Aug	2001-08-14	13:18:00	13:00-13:59	36.8843	0.139737	0.0469417	18.2406	1	172.5	4.74346	285.076	132.846	2.97681
2001	08	Aug	2001-08-14	13:33:00	13:00-13:59	33.8058	0.122627	0.0322031	6.48122	2	243.45	10.0449	333.847	118.695	3.80793
2001	08	Aug	2001-08-14	13:48:00	13:00-13:59	26.6744	0.0797156	0.0210405	6.69097	1	172.5	12.1818	347.337	176.563	3.78867
2001	08	Aug	2001-08-14	14:19:00	14:00-14:59	28.8761	0.0829322	0.0267928	3.71681	6	527.25	11.6417	345.572	137.638	3.09532
2001	08	Aug	2001-08-14	14:34:00	14:00-14:59	41.9228	0.187213	0.0639466	7.18354	1	172.5	11.7999	353.885	178.392	2.92764
2001	08	Aug	2001-08-15	10:16:00	10:00-10:59	27.2733	0.0814706	0.0212507	3.62416	3	314.4	14.3254	341.563	142.376	3.83378
2001	08	Aug	2001-08-15	10:17:00	10:00-10:59	33.4955	0.119096	0.0308621	2.92527	4	385.35	15.8997	326.62	113.899	3.85896
2001	08	Aug	2001-08-15	10:31:00	10:00-10:59	29.4825	0.0806991	0.0338569	5.84281	3	314.4	9.68112	325.867	95.8053	2.38353
2001	08	Aug	2001-08-15	11:18:00	11:00-11:59	41.3681	0.184158	0.0452777	4.78023	3	314.4	11.3627	6.62135	47.97	4.0673
2001	08	Aug	2001-08-15	11:34:00	11:00-11:59	37.0409	0.166022	0.0411865	6.8038	1	172.5	11.9878	344.533	45.1936	4.03098
2001	08	Aug	2001-08-15	11:46:00	11:00-11:59	27.6818	0.0726007	0.0292221	3.59863	2	243.45	19.4398	76.0121	33.4491	2.48444
2001	08	Aug	2001-08-15	13:20:00	13:00-13:59	27.0165	0.0789504	0.021014	4.43119	4	385.35	11.7009	324.439	17.2046	3.75703
2001	08	Aug	2001-08-15	13:32:00	13:00-13:59	28.9004	0.0834178	0.0265633	4.89613	2	243.45	14.2048	6.80256	135.659	3.14034
2001	08	Aug	2001-08-15	13:32:00	13:00-13:59	38.0841	0.155127	0.0405173	4.10506	2	243.45	16.1471	82.4089	35.8656	3.82867
2001	08	Aug	2001-08-15	13:46:00	13:00-13:59	25.1993	0.0628812	0.0206964	3.14744	4	385.35	15.3209	357.293	178.198	3.03827
2001	08	Aug	2001-08-16	13:03:00	13:00-13:59	29.7503	0.096525	0.0272336	7.16755	1	172.5	11.27	69.439	145.988	3.54434
2001	08	Aug	2001-08-16	13:05:00	13:00-13:59	27.7832	0.0849295	0.0218363	8.48434	1	172.5	9.38762	71.9068	116.586	3.88938
2001	08	Aug	2001-08-16	13:16:00	13:00-13:59	30.0075	0.0883484	0.036822	6.71996	1	172.5	11.7999	71.6116	146.398	2.39934
2001	08	Aug	2001-08-16	13:17:00	13:00-13:59	29.1463	0.0983213	0.0245073	8.65038	1	172.5	9.1482	103.027	175.813	4.01192
2001	08	Aug	2001-08-17	13:18:00	13:00-13:59	41.6795	0.180867	0.0542077	12.2177	1	172.5	6.98549	26.7557	103.112	3.33655
2001	08	Aug	2001-08-18	09:04:00	09:00-09:59	25.4395	0.0743865	0.0181877	14.8876	1	172.5	4.92958	248.419	166.862	4.08993
2001	08	Aug	2001-08-18	09:32:00	09:00-09:59	39.2036	0.181662	0.0462166	3.91956	4	385.35	10.0286	281.066	22.8877	3.93066
2001	08	Aug	2001-08-18	09:32:00	09:00-09:59	30.5279	0.100747	0.0309434	4.84915	5	456.3	7.91567	287.995	151.595	3.25585
2001	08	Aug	2001-08-18	09:34:00	09:00-09:59	39.8743	0.176218	0.0565532	10.7206	1	172.5	7.85981	211.79	167.027	3.11597
2001	08	Aug	2001-08-18	10:03:00	10:00-10:59	30.7366	0.104218	0.0263774	3.18416	5	456.3	14.354	300.974	42.3951	3.95102
2001	08	Aug	2001-08-18	10:04:00	10:00-10:59	28.1887	0.0985028	0.0251994	2.85557	6	527.25	12.7004	271.332	52.2591	3.90894
2001	08	Aug	2001-08-18	10:48:00	10:00-10:59	29.0621	0.0901574	0.0364422	4.84092	5	456.3	9.23528	270.894	53.043	2.47399
2001	08	Aug	2001-08-18	10:49:00	10:00-10:59	26.579	0.0752521	0.0218146	10.1353	2	243.45	6.57044	350.817	17.3029	3.44962
2001	08	Aug	2001-08-18	10:50:00	10:00-10:59	32.8109	0.115681	0.030911	8.3662	3	314.4	6.64004	314.245	24.3039	3.74239
2001	08	Aug	2001-08-18	11:31:00	11:00-11:59	30.703	0.102224	0.0263783	4.96205	4	385.35	10.0286	293.155	55.389	3.87533
2001	08	Aug	2001-08-18	12:01:00	12:00-12:59	31.4387	0.107286	0.0286439	12.3384	2	243.45	5.45811	252.16	3.67065	3.74552
2001	08	Aug	2001-08-18	12:01:00	12:00-12:59	38.0261	0.15524	0.0428685	7.35915	3	314.4	7.51118	246.087	54.7593	3.62129
2001	08	Aug	2001-08-18	12:03:00	12:00-12:59	28.2743	0.0853051	0.0220104	7.06001	2	243.45	9.67921	284.268	85.513	3.87566
2001	08	Aug	2001-08-18	12:04:00	12:00-12:59	36.0412	0.11088	0.0567578	6.56987	4	385.35	7.43764	269.175	87.829	1.95356
2001	08	Aug	2001-08-18	12:48:00	12:00-12:59	25.1383	0.0665582	0.0172985	3.35498	5	456.3	11.6666	269.021	84.6665	3.84763
2001	08	Aug	2001-08-18	12:50:00	12:00-12:59	36.7422	0.106182	0.0694615	4.53487	3	314.4	12.061	272.308	50.7316	1.52864
2001	08	Aug	2001-08-18	12:50:00	12:00-12:59	31.0312	0.108757	0.027681	4.79321	3	314.4	11.8529	139.984	48.5049	3.92893
2001	08	Aug	2001-08-18	13:03:00	13:00-13:59	26.4256	0.0750239	0.0334473	5.99844	1	172.5	14.4548	300.087	47.4584	2.24305
2001	08	Aug	2001-08-20	11:19:00	11:00-11:59	27.754	0.0774337	0.03519	5.14137	5	456.3	8.98561	95.0099	89.0964	2.20045
2001	08	Aug	2001-08-20	11:20:00	11:00-11:59	41.0505	0.179962	0.0515751	11.113	1	172.5	7.1853	102.56	70.2214	3.48931
2001	08	Aug	2001-08-20	12:02:00	12:00-12:59	32.9	0.127147	0.0513164	5.18156	3	314.4	10.0347	76.2312	83.9917	2.47771
2001	08	Aug	2001-08-20	12:03:00	12:00-12:59	28.9102	0.0910412	0.0340758	4.92724	6	527.25	8.73065	34.3399	151.77	2.67172
2001	08	Aug	2001-08-20	12:31:00	12:00-12:59	30.1117	0.105873	0.0287	4.27975	7	598.2	9.27313	305.239	3.26364	3.68894
2001	08	Aug	2001-08-20	13:46:00	13:00-13:59	36.7014	0.145418	0.0361843	12.2856	1	172.5	6.98549	92.9927	144.85	4.01881
2001	08	Aug	2001-08-20	14:04:00	14:00-14:59	25.3392	0.0667769	0.0205592	5.39673	3	314.4	8.9847	53.6421	62.3663	3.24803
2001	08	Aug	2001-08-20	14:46:00	14:00-14:59	31.4543	0.105439	0.032574	4.75425	3	314.4	10.4151	58.5147	67.6887	3.2369
2001	08	Aug	2001-08-22	09:16:00	09:00-09:59	31.9761	0.113383	0.028327	10.8759	2	243.45	6.22447	218.121	19.9939	4.00264
2001	08	Aug	2001-08-22	10:03:00	10:00-10:59	33.9809	0.12482	0.0361406	22.2036	1	172.5	3.89741	277.468	112.078	3.45373
2001	08	Aug	2001-08-22	10:05:00	10:00-10:59	39.9533	0.152015	0.0599735	13.4217	2	243.45	4.69883	288.35	85.4747	2.5347
2001	08	Aug	2001-08-22	10:34:00	10:00-10:59	32.375	0.106489	0.033636	8.96526	3	314.4	6.19127	275.87	57.6925	3.16591
2001	08	Aug	2001-08-22	10:46:00	10:00-10:59	31.1922	0.105749	0.0285079	8.20064	4	385.35	6.10347	269.632	84.9854	3.70948
2001	08	Aug	2001-08-22	10:49:00	10:00-10:59	29.354	0.0899886	0.0269298	5.63765	3	314.4	6.14971	284.625	78.835	3.3416
2001	08	Aug	2001-08-22	11:02:00	11:00-11:59	27.5008	0.0755567	0.0235883	11.1284	2	243.45	6.22447	293.421	156.71	3.20315
2001	08	Aug	2001-08-22	12:01:00	12:00-12:59	36.3189	0.124914	0.0508442	13.177	2	243.45	5.06812	252.788	107.157	2.45679
2001	08	Aug	2001-08-22	12:35:00	12:00-12:59	35.8105	0.156342	0.040497	12.3662	2	243.45	4.30005	273.567	57.6748	3.86059
2001	08	Aug	2001-08-22	12:48:00	12:00-12:59	34.1527	0.116285	0.0426461	13.5715	1	172.5	5.1309	281.301	115.06	2.72675
2001	08	Aug	2001-08-22	14:34:00	14:00-14:59	35.718	0.130327	0.0443199	11.8691	1	172.5	7.11744	329.098	118.812	2.94061
2001	08	Aug	2001-08-23	09:01:00	09:00-09:59	34.6226	0.126301	0.036614	11.52	2	243.45	4.32628	302.069	174.776	3.44952
2001	08	Aug	2001-08-24	10:50:00	10:00-10:59	36.7824	0.136648	0.0428184	4.92082	2	243.45	12.2419	333.879	158.188	3.19134
2001	08	Aug	2001-08-24	12:17:00	12:00-12:59	29.891	0.0998229	0.0268269	6.1509	4	385.35	6.68486	358.27	137.814	3.721
2001	08	Aug	2001-08-25	12:20:00	12:00-12:59	31.0061	0.106542	0.0389586	6.9931	2	243.45	8.2524	223.733	21.692	2.73474
2001	08	Aug	2001-08-25	13:03:00	13:00-13:59	40.9987	0.16635	0.05643	6.59893	2	243.45	8.44904	290.67	114.375	2.94791
2001	08	Aug	2001-08-25	13:31:00	13:00-13:59	28.4312	0.0786702	0.0330179	8.94777	1	172.5	9.90615	267.804	138.839	2.38265
2001	08	Aug	2001-08-26	11:02:00	11:00-11:59	28.1335	0.085235	0.0211579	7.45042	1	172.5	11.0387	209.856	102.032	4.02852
2001	08	Aug	2001-08-26	14:01:00	14:00-14:59	25.0212	0.0701005	0.0222825	5.50727	4	385.35	9.35971	172.31	160.714	3.14599
2001	08	Aug	2001-08-26	14:17:00	14:00-14:59	33.3159	0.141646	0.0407168	4.01486	4	385.35	12.0355	225.877	44.7683	3.4788
2001	08	Aug	2001-08-27	09:16:00	09:00-09:59	26.7204	0.0825345	0.0232795	6.89964	2	243.45	10.0449	160.202	179.6	3.54537
2001	08	Aug	2001-08-27	09:17:00	09:00-09:59	34.3809	0.122907	0.0386229	4.26347	4	385.35	10.211	146.293	140.925	3.18222
2001	08	Aug	2001-08-27	09:35:00	09:00-09:59	27.1714	0.0828785	0.0224027	10.39	1	172.5	7.62132	220.768	107.852	3.69948
2001	08	Aug	2001-08-27	10:46:00	10:00-10:59	38.1092	0.148358	0.04557	5.88658	2	243.45	10.756	160.956	160.57	3.2556
2001	08	Aug	2001-08-27	10:49:00	10:00-10:59	36.3368	0.139207	0.0371383	5.44073	3	314.4	9.68112	177.712	143.187	3.74834
2001	08	Aug	2001-08-27	11:01:00	11:00-11:59	39.6505	0.165822	0.0436082	2.62271	4	385.35	12.8629	166.034	62.8972	3.80254
2001	08	Aug	2001-08-27	11:02:00	11:00-11:59	33.5838	0.117943	0.0318451	4.23322	4	385.35	10.5965	156.466	154.818	3.70364
2001	08	Aug	2001-08-27	11:05:00	11:00-11:59	34.0145	0.132675	0.0325153	9.66311	1	172.5	8.45517	164.621	104.978	4.08037
2001	08	Aug	2001-08-27	11:17:00	11:00-11:59	39.9677	0.149943	0.0625361	6.29252	2	243.45	10.5953	109.669	132.854	2.3977
2001	08	Aug	2001-08-27	11:18:00	11:00-11:59	37.9103	0.151507	0.0403741	7.61363	2	243.45	8.12632	178.722	94.9234	3.75257
2001	08	Aug	2001-08-27	11:31:00	11:00-11:59	34.7335	0.122761	0.0398985	3.75329	2	243.45	14.5549	160.839	144.221	3.07684
2001	08	Aug	2001-08-27	12:04:00	12:00-12:59	32.7336	0.114928	0.0324098	4.47711	2	243.45	11.8332	180.777	25.8761	3.54608
2001	08	Aug	2001-08-27	12:34:00	12:00-12:59	34.4089	0.120304	0.0388832	13.6543	2	243.45	4.30005	145.578	130.766	3.09398
2001	08	Aug	2001-08-27	12:34:00	12:00-12:59	28.6399	0.0814682	0.0285394	5.11967	6	527.25	8.35099	168.334	48.4959	2.85459
2001	08	Aug	2001-08-27	12:35:00	12:00-12:59	33.9627	0.12879	0.0320908	6.09185	5	456.3	7.22723	169.646	7.53187	4.01331
2001	08	Aug	2001-08-27	12:46:00	12:00-12:59	35.6618	0.11139	0.0558014	6.16493	7	598.2	6.4091	357.487	113.389	1.99618
2001	08	Aug	2001-08-27	13:01:00	13:00-13:59	32.28	0.11089	0.033319	8.27508	2	243.45	8.06471	160.265	100.953	3.32813
2001	08	Aug	2001-08-27	13:19:00	13:00-13:59	34.1532	0.125346	0.0307442	9.42107	2	243.45	6.95714	134.616	126.714	4.07707
2001	08	Aug	2001-08-27	13:31:00	13:00-13:59	36.0306	0.140543	0.0347124	4.72736	3	314.4	10.2595	149.802	174.595	4.04879
2001	08	Aug	2001-08-27	13:34:00	13:00-13:59	35.6797	0.120922	0.0574044	8.35514	2	243.45	8.06471	135.62	157.178	2.1065
2001	08	Aug	2001-08-27	13:47:00	13:00-13:59	32.864	0.115271	0.0292044	4.95726	7	598.2	7.92414	162.547	129.418	3.94705
2001	08	Aug	2001-08-27	13:48:00	13:00-13:59	34.9768	0.12711	0.0382344	3.84235	6	527.25	10.6713	151.768	155.635	3.32449
2001	08	Aug	2001-08-27	14:18:00	14:00-14:59	39.1672	0.158692	0.0448828	3.21766	5	456.3	10.9012	163.747	15.9795	3.5357
2001	08	Aug	2001-08-27	14:34:00	14:00-14:59	35.17	0.127404	0.0409431	11.7075	2	243.45	5.7223	198.283	20.2223	3.11173
2001	08	Aug	2001-08-27	14:35:00	14:00-14:59	28.6984	0.0883613	0.0231126	6.02158	5	456.3	7.5558	205.403	112.088	3.82308
2001	08	Aug	2001-08-28	12:46:00	12:00-12:59	26.348	0.0693333	0.0240081	10.1027	4	385.35	5.10459	215.241	85.0492	2.88791
2001	08	Aug	2001-08-28	13:17:00	13:00-13:59	39.5253	0.150507	0.0558187	13.8512	3	314.4	4.01859	236.058	67.3919	2.69636
2001	08	Aug	2001-08-29	09:35:00	09:00-09:59	41.5488	0.164907	0.093643	3.10775	2	243.45	18.0696	278.052	147.766	1.76102
2001	08	Aug	2001-08-31	10:19:00	10:00-10:59	38.8382	0.171573	0.042477	9.46995	1	172.5	6.98549	123.375	79.7361	4.03919
2001	08	Aug	2001-08-31	14:16:00	14:00-14:59	27.23	0.0722196	0.0314331	7.73867	2	243.45	8.58543	126.902	143.672	2.29757
2001	09	Sep	2001-09-01	09:03:00	09:00-09:59	31.4994	0.10178	0.0370909	4.48927	7	598.2	8.89457	113.865	3.93049	2.74408
2001	09	Sep	2001-09-01	12:01:00	12:00-12:59	32.832	0.116256	0.0314648	6.51287	4	385.35	7.64008	107.099	159.281	3.69479
2001	09	Sep	2001-09-01	12:02:00	12:00-12:59	28.4865	0.0939457	0.0233287	13.7702	1	172.5	6.28628	63.6286	88.342	4.02705
2001	09	Sep	2001-09-01	13:05:00	13:00-13:59	35.0569	0.132317	0.0334461	2.79273	6	527.25	12.393	89.4281	92.9603	3.95612
2001	09	Sep	2001-09-01	13:31:00	13:00-13:59	37.6607	0.148276	0.0408298	3.71985	6	527.25	8.73065	276.852	8.83058	3.63156
2001	09	Sep	2001-09-01	13:46:00	13:00-13:59	28.2058	0.0867564	0.0230178	2.09035	7	598.2	15.8511	65.722	131.118	3.7691
2001	09	Sep	2001-09-01	14:18:00	14:00-14:59	34.9304	0.122664	0.0412016	3.68347	5	456.3	9.63693	41.1316	38.2578	2.97715
2001	09	Sep	2001-09-03	14:17:00	14:00-14:59	40.4331	0.187906	0.0473428	5.5148	1	172.5	13.3552	95.0896	154.636	3.96905
2001	09	Sep	2001-09-03	14:20:00	14:00-14:59	28.3722	0.093878	0.0234302	9.8946	1	172.5	8.3846	85.6214	22.73	4.00671
2001	09	Sep	2001-09-04	11:03:00	11:00-11:59	29.5004	0.0894041	0.0303287	4.80664	1	172.5	17.0957	140.292	60.7927	2.94784
2001	09	Sep	2001-09-04	11:03:00	11:00-11:59	33.22	0.116532	0.033931	5.08504	1	172.5	14.4548	157.742	118.78	3.43438
2001	09	Sep	2001-09-04	13:01:00	13:00-13:59	26.7078	0.0735909	0.0219293	5.61035	1	172.5	14.4548	129.455	135.5	3.35582
2001	09	Sep	2001-09-06	11:47:00	11:00-11:59	38.5287	0.161743	0.0398136	2.68278	3	314.4	16.3753	134.409	158.271	4.0625
2001	09	Sep	2001-09-06	12:20:00	12:00-12:59	28.1748	0.0814943	0.0241039	6.4402	2	243.45	9.67921	122.286	130.285	3.38096
2001	09	Sep	2001-09-06	12:20:00	12:00-12:59	25.4485	0.0676109	0.0223397	5.06279	4	385.35	10.4002	120.368	152.337	3.02649
2001	09	Sep	2001-09-07	13:02:00	13:00-13:59	33.7829	0.115112	0.0420548	3.3112	1	172.5	22.4213	96.1429	160.554	2.7372
2001	09	Sep	2001-09-08	11:32:00	11:00-11:59	26.8877	0.0666175	0.0406186	3.4452	1	172.5	23.1775	108.796	62.4242	1.64007
2001	09	Sep	2001-09-11	11:32:00	11:00-11:59	34.011	0.12684	0.0322471	3.1551	5	456.3	13.3008	118.589	115.597	3.93338
2001	09	Sep	2001-09-11	11:46:00	11:00-11:59	34.7389	0.135633	0.0389045	5.30085	1	172.5	15.8771	111.569	99.255	3.4863
2001	09	Sep	2001-09-11	14:01:00	14:00-14:59	27.4217	0.0724309	0.0294452	4.38849	1	172.5	17.3924	120.205	11.8701	2.45986
2001	09	Sep	2001-09-11	14:02:00	14:00-14:59	38.3064	0.160356	0.0471373	4.24488	2	243.45	15.3097	156.323	104.215	3.4019
2001	09	Sep	2001-09-14	11:50:00	11:00-11:59	31.5096	0.103415	0.0361866	5.85565	3	314.4	8.64548	97.1872	8.30056	2.85782
2001	09	Sep	2001-09-14	12:01:00	12:00-12:59	37.4285	0.155583	0.038868	5.36072	2	243.45	12.2419	102.378	88.4549	4.00285
2001	09	Sep	2001-09-16	11:34:00	11:00-11:59	38.1691	0.154121	0.0378173	6.01756	3	314.4	9.16449	206.642	113.951	4.07543
2001	09	Sep	2001-09-16	13:50:00	13:00-13:59	38.6474	0.159447	0.0420381	2.5947	5	456.3	13.0398	140.559	19.093	3.79292
2001	09	Sep	2001-09-20	11:18:00	11:00-11:59	28.3733	0.0852031	0.0338826	6.76434	3	314.4	8.4853	147.937	23.9254	2.51466
2001	09	Sep	2001-09-21	11:46:00	11:00-11:59	29.4217	0.0831572	0.0317995	13.8691	2	243.45	4.9273	202.875	35.806	2.61505
2001	09	Sep	2001-09-22	11:16:00	11:00-11:59	33.3783	0.12156	0.0320395	8.89917	5	456.3	5.03694	53.0552	81.559	3.79405
2001	09	Sep	2001-09-22	11:20:00	11:00-11:59	39.2126	0.15885	0.0476392	11.2213	2	243.45	5.91312	234.503	67.6222	3.33445
2001	09	Sep	2001-09-24	11:33:00	11:00-11:59	34.0144	0.127996	0.0321432	6.99722	4	385.35	6.68486	216.129	87.981	3.98207
2001	09	Sep	2001-09-24	12:18:00	12:00-12:59	40.2508	0.178707	0.0446118	12.646	2	243.45	5.06812	184.124	178.349	4.00582
2001	09	Sep	2001-09-24	12:49:00	12:00-12:59	28.54	0.0953185	0.0234807	7.97153	1	172.5	11.0387	249.558	78.7915	4.05944
2001	09	Sep	2001-09-24	14:50:00	14:00-14:59	37.8278	0.155804	0.0470773	5.58099	1	172.5	13.025	108.85	107.876	3.30953
2001	09	Sep	2001-09-25	12:34:00	12:00-12:59	34.8215	0.131115	0.0329169	10.3488	3	314.4	4.67478	53.2022	73.7059	3.98321
2001	09	Sep	2001-09-26	12:47:00	12:00-12:59	37.2792	0.150318	0.0408167	6.48013	2	243.45	10.2878	233.973	75.2167	3.68277
2001	09	Sep	2001-09-27	11:01:00	11:00-11:59	35.578	0.127572	0.0401474	6.74862	4	385.35	7.29272	106.915	54.55	3.17758
2001	09	Sep	2001-09-28	11:02:00	11:00-11:59	37.4315	0.152008	0.0440435	4.71072	2	243.45	14.0918	284.376	116.423	3.45132
2001	09	Sep	2001-09-28	12:02:00	12:00-12:59	27.1394	0.0793748	0.0199727	4.20877	4	385.35	11.0123	305.825	108.437	3.97416
2001	09	Sep	2001-09-28	12:47:00	12:00-12:59	25.3122	0.0521098	0.033305	5.45428	1	172.5	15.6295	318.791	79.6262	1.56463
2001	09	Sep	2001-09-28	13:47:00	13:00-13:59	27.464	0.0828115	0.0209293	9.08444	1	172.5	9.67706	313.901	97.6123	3.95673
2001	10	Oct	2001-10-02	13:18:00	13:00-13:59	33.2137	0.113553	0.0329509	5.36451	1	172.5	13.2544	34.1671	169.002	3.44614
2001	10	Oct	2001-10-03	12:02:00	12:00-12:59	35.9901	0.152469	0.0389907	6.57499	1	172.5	12.5893	37.972	102.281	3.9104
2001	10	Oct	2001-10-06	14:46:00	14:00-14:59	40.6347	0.168556	0.0549024	5.0158	1	172.5	15.7523	281.703	83.462	3.0701
2001	10	Oct	2001-10-12	10:35:00	10:00-10:59	28.3396	0.0828954	0.0279549	4.75252	3	314.4	11.2694	346.621	11.7136	2.96532
2001	10	Oct	2001-10-12	12:17:00	12:00-12:59	38.8928	0.169337	0.0418006	8.30682	1	172.5	9.31794	318.018	125.798	4.05107
2001	10	Oct	2001-10-13	13:20:00	13:00-13:59	27.5844	0.0861704	0.0246334	13.7319	1	172.5	6.28628	312.666	92.4114	3.49811
2001	10	Oct	2001-10-22	12:33:00	12:00-12:59	30.9231	0.103418	0.0255843	3.83453	3	314.4	11.6518	50.6779	72.144	4.04224
2002	05	May	2002-05-03	10:16:00	10:00-10:59	41.2331	0.177281	0.0538589	6.932	2	243.45	9.17807	173.38	15.4573	3.29159
2002	05	May	2002-05-03	11:18:00	11:00-11:59	38.8102	0.160232	0.039763	10.1584	3	314.4	5.45406	301.822	64.1746	4.02967
2002	05	May	2002-05-06	13:49:00	13:00-13:59	34.6151	0.130825	0.0469448	6.52458	1	172.5	10.3131	237.027	115.549	2.78679
2002	05	May	2002-05-07	14:48:00	14:00-14:59	39.357	0.164822	0.0490953	9.77016	2	243.45	5.76884	324.458	132.695	3.35718
2002	05	May	2002-05-08	14:01:00	14:00-14:59	36.7179	0.139317	0.0383264	5.55434	2	243.45	10.4393	212.023	33.5563	3.63502
2002	05	May	2002-05-08	14:20:00	14:00-14:59	34.2839	0.125704	0.0339763	8.47295	3	314.4	5.94999	195.908	26.9855	3.69975
2002	05	May	2002-05-12	09:46:00	09:00-09:59	30.3012	0.096341	0.0274219	15.1019	3	314.4	3.81764	11.2057	24.1526	3.51329
2002	05	May	2002-05-12	10:31:00	10:00-10:59	38.46	0.155919	0.0441247	9.64514	4	385.35	5.01343	321.726	47.7077	3.5336
2002	05	May	2002-05-12	11:35:00	11:00-11:59	35.2155	0.133243	0.0338186	5.61965	5	456.3	7.07343	307.693	8.82896	3.93994
2002	05	May	2002-05-12	12:20:00	12:00-12:59	28.9784	0.0798844	0.0322706	8.66313	3	314.4	5.79933	309.164	12.4991	2.47545
2002	05	May	2002-05-12	12:31:00	12:00-12:59	27.1675	0.0808072	0.0254202	6.42171	5	456.3	7.22723	345.666	126.288	3.17886
2002	05	May	2002-05-12	12:34:00	12:00-12:59	38.6704	0.161144	0.0438834	7.103	3	314.4	6.64004	276.842	66.2771	3.6721
2002	05	May	2002-05-12	12:34:00	12:00-12:59	29.8829	0.0965702	0.0242786	6.21146	5	456.3	7.22723	299.158	74.9399	3.97758
2002	05	May	2002-05-15	12:16:00	12:00-12:59	35.617	0.133945	0.0345356	3.51508	6	527.25	11.2992	17.28	19.5184	3.87845
2002	05	May	2002-05-16	09:19:00	09:00-09:59	29.4648	0.0943201	0.0447087	3.15784	8	669.15	12.3429	332.172	14.5325	2.10966
2002	05	May	2002-05-16	09:48:00	09:00-09:59	39.7993	0.175392	0.0466708	6.24232	3	314.4	8.4853	224.044	15.7109	3.75806
2002	05	May	2002-05-16	09:48:00	09:00-09:59	29.4972	0.103943	0.0326372	3.17755	8	669.15	12.1129	24.4712	148.398	3.1848
2002	05	May	2002-05-16	11:03:00	11:00-11:59	34.0943	0.116123	0.0377613	8.24823	2	243.45	6.69447	294.987	135.855	3.07518
2002	05	May	2002-05-16	13:05:00	13:00-13:59	38.0862	0.140981	0.053371	12.1916	2	243.45	5.33495	236.972	119.698	2.64153
2002	05	May	2002-05-16	14:50:00	14:00-14:59	34.9684	0.126871	0.0388405	7.17556	2	243.45	9.33925	318.736	159.701	3.26647
2002	05	May	2002-05-17	09:34:00	09:00-09:59	28.5033	0.0756128	0.0320081	4.0954	3	314.4	14.3254	323.97	114.038	2.36231
2002	05	May	2002-05-17	10:35:00	10:00-10:59	25.0361	0.0684599	0.0181417	4.03978	2	243.45	17.3325	223.23	33.3476	3.77363
2002	05	May	2002-05-17	10:47:00	10:00-10:59	29.5904	0.0952809	0.024019	3.7635	3	314.4	15.2818	189.544	4.64276	3.9669
2002	05	May	2002-05-17	10:48:00	10:00-10:59	25.2999	0.068933	0.0182083	4.46616	3	314.4	11.2694	271.651	70.3291	3.78581
2002	05	May	2002-05-17	11:35:00	11:00-11:59	36.9817	0.144518	0.0370553	4.01377	3	314.4	13.8907	260.449	32.1549	3.90006
2002	05	May	2002-05-17	11:49:00	11:00-11:59	37.7225	0.135358	0.0581249	2.28088	7	598.2	15.5679	250.276	69.1467	2.32874
2002	05	May	2002-05-17	13:01:00	13:00-13:59	40.6763	0.176371	0.0435734	4.49194	2	243.45	14.3196	244.767	141.131	4.04769
2002	05	May	2002-05-19	11:04:00	11:00-11:59	33.8066	0.129699	0.0316595	6.38831	4	385.35	7.48724	1.11711	113.805	4.09668
2002	05	May	2002-05-19	11:05:00	11:00-11:59	33.6675	0.121541	0.0297798	9.72698	3	314.4	5.58711	18.3103	133.91	4.08133
2002	05	May	2002-05-19	11:31:00	11:00-11:59	28.1153	0.0855094	0.0214386	6.12157	5	456.3	7.5558	85.9855	103.115	3.98857
2002	05	May	2002-05-19	12:32:00	12:00-12:59	30.5227	0.0988904	0.0311298	5.00668	4	385.35	10.0286	71.2626	78.7305	3.17672
2002	05	May	2002-05-19	13:01:00	13:00-13:59	41.6371	0.180051	0.0508336	6.09948	2	243.45	9.85865	13.0375	13.5314	3.54197
2002	05	May	2002-05-19	13:31:00	13:00-13:59	36.6741	0.141836	0.0361038	3.16768	3	314.4	17.1099	17.1236	91.9254	3.92856
2002	05	May	2002-05-20	13:16:00	13:00-13:59	39.6918	0.171661	0.0543991	3.71762	1	172.5	21.7819	202.781	20.2914	3.15559
2002	05	May	2002-05-23	11:34:00	11:00-11:59	27.773	0.0869728	0.0213274	3.82493	4	385.35	13.3737	13.6615	174.236	4.07798
2002	05	May	2002-05-27	12:48:00	12:00-12:59	25.6929	0.0710612	0.0180527	4.95299	5	456.3	9.36539	49.701	94.9724	3.93633
2002	05	May	2002-05-31	09:19:00	09:00-09:59	39.5531	0.167539	0.0449873	5.61191	2	243.45	10.675	76.1353	164.954	3.72415
2002	05	May	2002-05-31	09:31:00	09:00-09:59	33.9778	0.130153	0.0317582	3.86822	3	314.4	10.2595	86.4886	54.4811	4.09826
2002	05	May	2002-05-31	09:32:00	09:00-09:59	40.0167	0.168247	0.0543392	5.66681	3	314.4	8.81182	85.7629	5.22608	3.09623
2002	05	May	2002-05-31	12:02:00	12:00-12:59	25.4769	0.0700275	0.017594	7.22213	4	385.35	6.9325	66.3986	45.2706	3.9802
2002	05	May	2002-05-31	13:02:00	13:00-13:59	38.3831	0.158067	0.0427818	7.0494	2	243.45	9.33925	28.298	16.9044	3.69472
2002	06	Jun	2002-06-01	09:35:00	09:00-09:59	31.2171	0.106214	0.0265709	5.03931	5	456.3	8.63544	291.556	31.3427	3.99738
2002	06	Jun	2002-06-01	10:18:00	10:00-10:59	25.5243	0.0690371	0.0200659	3.00047	5	456.3	15.1157	297.429	138.602	3.44051
2002	06	Jun	2002-06-01	10:19:00	10:00-10:59	41.0755	0.183643	0.0502596	4.53207	4	385.35	10.4002	273.902	107.678	3.65389
2002	06	Jun	2002-06-01	10:35:00	10:00-10:59	36.1984	0.141105	0.0355922	3.6716	2	243.45	17.7673	312.561	134.224	3.96449
2002	06	Jun	2002-06-01	10:49:00	10:00-10:59	36.3195	0.143577	0.0371686	3.5673	3	314.4	10.7408	335.828	45.4559	3.86285
2002	06	Jun	2002-06-01	10:49:00	10:00-10:59	31.1887	0.117833	0.0360694	4.36548	6	527.25	9.54423	315.233	68.3689	3.26685
2002	06	Jun	2002-06-01	11:01:00	11:00-11:59	32.7838	0.10831	0.0338975	8.03672	2	243.45	8.44904	227.226	68.2065	3.19523
2002	06	Jun	2002-06-01	11:19:00	11:00-11:59	25.0258	0.0724148	0.0202005	3.83193	4	385.35	13.3737	359.561	15.4724	3.58479
2002	06	Jun	2002-06-01	11:34:00	11:00-11:59	29.7142	0.0956603	0.0251697	4.8568	5	456.3	9.49922	285.523	64.2809	3.80061
2002	06	Jun	2002-06-01	11:49:00	11:00-11:59	31.0315	0.0957399	0.0365232	4.64259	4	385.35	10.8004	285.24	28.4213	2.62135
2002	06	Jun	2002-06-01	12:02:00	12:00-12:59	28.8616	0.0846846	0.0261019	5.26985	4	385.35	8.77452	269.521	36.3575	3.24439
2002	06	Jun	2002-06-01	12:03:00	12:00-12:59	36.4697	0.139939	0.0393297	4.36198	6	527.25	9.3696	80.3364	16.6226	3.55811
2002	06	Jun	2002-06-01	12:48:00	12:00-12:59	38.9401	0.16679	0.042315	8.53813	4	385.35	5.29724	243.744	41.0181	3.94162
2002	06	Jun	2002-06-01	12:48:00	12:00-12:59	30.2384	0.103522	0.0264762	6.68994	5	456.3	6.15639	256.681	36.1939	3.91001
2002	06	Jun	2002-06-01	12:48:00	12:00-12:59	26.7433	0.0757085	0.0197742	5.68569	5	456.3	7.91567	251.754	4.66852	3.82865
2002	06	Jun	2002-06-01	13:01:00	13:00-13:59	33.7913	0.112924	0.0378642	7.37057	2	243.45	9.02237	239.385	32.9093	2.98235
2002	06	Jun	2002-06-01	13:04:00	13:00-13:59	25.4569	0.0696539	0.0240418	6.01207	3	314.4	9.16449	296.628	140.626	2.8972
2002	06	Jun	2002-06-01	13:18:00	13:00-13:59	36.4727	0.138577	0.0426547	5.11794	4	385.35	8.3815	290.061	30.9607	3.24882
2002	06	Jun	2002-06-01	13:46:00	13:00-13:59	39.7686	0.164341	0.0468112	6.09289	3	314.4	8.9847	262.514	74.8418	3.51072
2002	06	Jun	2002-06-01	13:48:00	13:00-13:59	41.7113	0.173497	0.0542328	6.62727	3	314.4	8.18211	265.637	34.3357	3.19911
2002	06	Jun	2002-06-01	13:49:00	13:00-13:59	28.8552	0.0893054	0.0229439	3.91605	4	385.35	12.0355	269.689	94.0494	3.89234
2002	06	Jun	2002-06-01	14:16:00	14:00-14:59	28.2949	0.0820162	0.027573	5.41222	1	172.5	15.4745	269.367	134.871	2.97451
2002	06	Jun	2002-06-01	14:20:00	14:00-14:59	33.5688	0.109363	0.0410194	6.57619	2	243.45	10.363	324.682	143.379	2.66613
2002	06	Jun	2002-06-02	09:50:00	09:00-09:59	27.9941	0.0865469	0.0269086	2.60262	8	669.15	15.2367	314.079	166.066	3.21633
2002	06	Jun	2002-06-02	10:16:00	10:00-10:59	29.9043	0.0985723	0.0249179	7.52633	2	243.45	8.87186	319.95	145.205	3.95589
2002	06	Jun	2002-06-02	10:17:00	10:00-10:59	38.2407	0.161516	0.041116	3.64728	2	243.45	17.9172	327.705	0.555204	3.92829
2002	06	Jun	2002-06-02	11:48:00	11:00-11:59	25.0178	0.0653514	0.0216949	7.16074	2	243.45	8.44904	289.391	44.744	3.01229
2002	06	Jun	2002-06-02	13:03:00	13:00-13:59	32.4717	0.112198	0.0319576	5.45761	5	456.3	7.73155	326.13	83.5597	3.51085
2002	06	Jun	2002-06-02	13:19:00	13:00-13:59	32.8694	0.112351	0.0347094	4.56597	5	456.3	9.43183	322.438	22.9839	3.23689
2002	06	Jun	2002-06-02	13:19:00	13:00-13:59	29.4052	0.0871226	0.0275425	4.21603	5	456.3	9.92469	341.947	168.268	3.16321
2002	06	Jun	2002-06-02	13:32:00	13:00-13:59	35.1187	0.125234	0.0385267	3.30008	6	527.25	12.393	254.56	87.2032	3.25057
2002	06	Jun	2002-06-02	14:04:00	14:00-14:59	35.7234	0.157088	0.0522853	1.65058	10	811.05	19.0638	304.006	79.2591	3.00444
2002	06	Jun	2002-06-02	14:17:00	14:00-14:59	32.1191	0.116333	0.0387073	2.24226	6	527.25	18.5938	335.938	131.406	3.00546
2002	06	Jun	2002-06-02	14:19:00	14:00-14:59	27.6978	0.090662	0.0262677	3.17838	4	385.35	15.8997	348.282	115.384	3.45146
2002	06	Jun	2002-06-04	11:48:00	11:00-11:59	40.6374	0.176399	0.0506042	4.82115	4	385.35	8.50853	76.1684	42.7448	3.48585
2002	06	Jun	2002-06-08	09:32:00	09:00-09:59	30.1754	0.0941679	0.0293815	11.0384	3	314.4	4.97971	258.985	50.471	3.205
2002	06	Jun	2002-06-08	09:32:00	09:00-09:59	41.7643	0.170725	0.0593393	8.66499	3	314.4	6.3633	124.427	56.924	2.87709
2002	06	Jun	2002-06-08	09:32:00	09:00-09:59	39.7374	0.146847	0.0613054	7.21557	4	385.35	6.68486	285.382	110.83	2.39533
2002	06	Jun	2002-06-08	09:46:00	09:00-09:59	35.6762	0.135871	0.0360598	6.3717	3	314.4	8.81182	173.042	73.308	3.76794
2002	06	Jun	2002-06-08	10:03:00	10:00-10:59	35.8538	0.136103	0.0375792	6.6394	6	527.25	6.00203	270.273	54.0854	3.62176
2002	06	Jun	2002-06-11	14:19:00	14:00-14:59	28.5074	0.0898371	0.022164	2.49897	4	385.35	17.8372	26.7892	165.117	4.0533
2002	06	Jun	2002-06-12	12:34:00	12:00-12:59	28.8532	0.0784139	0.0325896	5.15179	5	456.3	9.04675	100.974	152.384	2.4061
2002	06	Jun	2002-06-12	12:35:00	12:00-12:59	38.4458	0.15217	0.0463352	4.83697	4	385.35	9.51841	69.5635	87.977	3.2841
2002	06	Jun	2002-06-12	13:20:00	13:00-13:59	29.842	0.0836296	0.0343152	8.559	2	243.45	7.09636	54.604	87.8991	2.4371
2002	06	Jun	2002-06-13	12:20:00	12:00-12:59	34.5162	0.120571	0.0404427	7.37611	2	243.45	9.17807	90.8606	95.1612	2.98129
2002	06	Jun	2002-06-13	12:50:00	12:00-12:59	41.1786	0.173775	0.0532051	7.855	2	243.45	8.31692	90.3929	17.5906	3.26612
2002	06	Jun	2002-06-14	09:05:00	09:00-09:59	38.6498	0.181444	0.0459999	2.02175	6	527.25	18.2985	21.7499	44.2787	3.94444
2002	06	Jun	2002-06-14	09:17:00	09:00-09:59	39.3114	0.157303	0.101978	2.20213	8	669.15	16.2529	86.6481	9.87213	1.54251
2002	06	Jun	2002-06-14	09:33:00	09:00-09:59	35.374	0.121961	0.04626	1.59949	11	882	21.0714	5.45353	10.2554	2.63643
2002	06	Jun	2002-06-14	09:48:00	09:00-09:59	31.0392	0.0914224	0.0365027	3.94626	5	456.3	11.1762	352.747	79.0063	2.50454
2002	06	Jun	2002-06-14	09:49:00	09:00-09:59	38.6208	0.157083	0.0418045	6.29641	3	314.4	8.81182	206.207	28.728	3.75756
2002	06	Jun	2002-06-14	10:02:00	10:00-10:59	35.1783	0.133878	0.0327971	5.7932	2	243.45	11.0926	2.09962	166.179	4.08201
2002	06	Jun	2002-06-14	10:49:00	10:00-10:59	36.396	0.155667	0.0497896	2.69894	7	598.2	13.9482	230.379	132.562	3.12649
2002	06	Jun	2002-06-14	11:05:00	11:00-11:59	36.2767	0.141448	0.0349918	6.22811	3	314.4	8.9847	148.191	117.419	4.04231
2002	06	Jun	2002-06-14	11:18:00	11:00-11:59	38.4325	0.143873	0.0541577	6.64416	2	243.45	10.0449	29.8188	29.2631	2.65656
2002	06	Jun	2002-06-14	11:48:00	11:00-11:59	29.7562	0.089225	0.0301555	4.11203	3	314.4	14.1047	346.43	173.195	2.95883
2002	06	Jun	2002-06-15	09:17:00	09:00-09:59	37.4249	0.151318	0.0385003	3.38287	5	456.3	12.091	22.7082	168.661	3.93031
2002	06	Jun	2002-06-15	09:17:00	09:00-09:59	40.0872	0.17708	0.0445219	3.9582	5	456.3	10.9012	52.1597	20.5728	3.97738
2002	06	Jun	2002-06-15	10:16:00	10:00-10:59	36.5133	0.148367	0.0371269	2.97347	6	527.25	13.0234	4.33398	103.057	3.99621
2002	06	Jun	2002-06-15	10:17:00	10:00-10:59	38.7642	0.160873	0.043051	6.83004	2	243.45	9.67921	87.1274	145.716	3.73679
2002	06	Jun	2002-06-15	10:50:00	10:00-10:59	32.7106	0.107543	0.0356508	3.1933	4	385.35	14.5277	24.225	146.162	3.01656
2002	06	Jun	2002-06-15	11:32:00	11:00-11:59	28.6194	0.0861187	0.0315094	4.04469	1	172.5	17.3924	22.9355	11.2626	2.73312
2002	06	Jun	2002-06-15	11:34:00	11:00-11:59	38.9792	0.152978	0.04664	5.79522	2	243.45	10.675	357.179	85.3061	3.27997
2002	06	Jun	2002-06-15	11:34:00	11:00-11:59	32.2278	0.108043	0.0310489	3.80431	3	314.4	15.0309	92.4228	72.8891	3.47976
2002	06	Jun	2002-06-15	11:48:00	11:00-11:59	30.8247	0.0909939	0.0331889	4.76964	3	314.4	12.1679	97.0985	154.477	2.7417
2002	06	Jun	2002-06-15	13:04:00	13:00-13:59	39.9973	0.153748	0.0565369	4.72288	2	243.45	13.4499	51.9991	77.7366	2.71943
2002	06	Jun	2002-06-15	13:04:00	13:00-13:59	39.0268	0.149413	0.0518899	3.3024	3	314.4	16.3753	45.1365	42.897	2.87942
2002	06	Jun	2002-06-15	14:16:00	14:00-14:59	28.4926	0.076233	0.0317638	3.76077	5	456.3	12.5475	120.264	158.911	2.39999
2002	06	Jun	2002-06-16	12:05:00	12:00-12:59	28.0163	0.0849398	0.0225093	4.23748	4	385.35	11.462	16.1731	96.8639	3.77355
2002	06	Jun	2002-06-16	13:32:00	13:00-13:59	32.8987	0.113892	0.0330082	4.21197	2	243.45	15.0495	354.531	66.1919	3.45041
2002	06	Jun	2002-06-16	13:50:00	13:00-13:59	37.3967	0.147762	0.038	2.37156	6	527.25	16.4674	358.648	53.2439	3.88848
2002	06	Jun	2002-06-17	09:01:00	09:00-09:59	41.2823	0.183721	0.0465275	4.5363	3	314.4	12.061	85.7885	41.1558	3.94865
2002	06	Jun	2002-06-17	09:18:00	09:00-09:59	27.1125	0.0848969	0.0220094	3.52267	3	314.4	14.5531	66.59	29.5796	3.85731
2002	06	Jun	2002-06-17	09:32:00	09:00-09:59	37.728	0.139609	0.0477265	5.12168	3	314.4	10.4151	18.614	158.685	2.92519
2002	06	Jun	2002-06-17	09:34:00	09:00-09:59	26.2842	0.0771756	0.0199557	5.48695	2	243.45	9.67921	355.584	93.4259	3.86734
2002	06	Jun	2002-06-17	09:48:00	09:00-09:59	36.9717	0.143014	0.0376574	7.32404	3	314.4	7.38999	45.2448	116.649	3.79776
2002	06	Jun	2002-06-17	10:01:00	10:00-10:59	29.9997	0.100781	0.0296186	10.8514	1	172.5	7.39689	28.8288	94.985	3.40263
2002	06	Jun	2002-06-17	10:04:00	10:00-10:59	37.636	0.14878	0.0406537	6.23843	2	243.45	9.67921	18.3786	65.1633	3.6597
2002	06	Jun	2002-06-17	10:18:00	10:00-10:59	38.274	0.155823	0.0414958	3.60942	6	527.25	10.5251	11.3606	42.8249	3.75514
2002	06	Jun	2002-06-17	10:33:00	10:00-10:59	32.9416	0.116133	0.030338	4.88584	5	456.3	9.23528	269.231	135.888	3.82796
2002	06	Jun	2002-06-17	10:34:00	10:00-10:59	36.5063	0.139599	0.0383527	4.12438	6	527.25	9.91377	107.293	114.524	3.63988
2002	06	Jun	2002-06-17	11:16:00	11:00-11:59	28.4389	0.0802068	0.026603	4.47249	2	243.45	15.579	99.0538	45.8692	3.01496
2002	06	Jun	2002-06-17	11:49:00	11:00-11:59	30.0578	0.0907324	0.0362011	7.13104	1	172.5	10.3131	30.6883	124.92	2.50634
2002	06	Jun	2002-06-17	12:31:00	12:00-12:59	32.0457	0.1224	0.0348273	4.08868	4	385.35	11.7009	25.2402	157.378	3.51449
2002	06	Jun	2002-06-17	12:33:00	12:00-12:59	35.1071	0.134518	0.03498	11.0355	1	172.5	7.73873	66.0475	94.1742	3.84556
2002	06	Jun	2002-06-17	12:48:00	12:00-12:59	29.3739	0.0740426	0.0406144	5.34948	1	172.5	13.9939	14.1371	86.5632	1.82306
2002	06	Jun	2002-06-17	12:50:00	12:00-12:59	33.5263	0.118291	0.057826	3.80552	4	385.35	12.7654	336.571	136.553	2.04564
2002	06	Jun	2002-06-17	13:17:00	13:00-13:59	37.8587	0.125638	0.0641203	7.66444	2	243.45	8.58543	346.814	82.1588	1.95941
2002	06	Jun	2002-06-17	13:18:00	13:00-13:59	38.2766	0.181055	0.0602089	2.28483	9	740.1	14.5743	298.465	83.055	3.00711
2002	06	Jun	2002-06-17	13:34:00	13:00-13:59	39.1736	0.152146	0.0559448	6.16798	2	243.45	9.85865	50.5748	136.52	2.71957
2002	06	Jun	2002-06-17	13:35:00	13:00-13:59	37.7043	0.154756	0.0425654	4.66109	4	385.35	10.211	17.5434	150.502	3.63571
2002	06	Jun	2002-06-17	14:34:00	14:00-14:59	36.6302	0.135839	0.041917	2.88859	6	527.25	12.5963	4.13347	91.4143	3.24068
2002	06	Jun	2002-06-18	11:18:00	11:00-11:59	31.7187	0.102857	0.0295214	5.3867	3	314.4	10.5754	81.5723	157.138	3.48414
2002	06	Jun	2002-06-18	12:01:00	12:00-12:59	38.3793	0.155804	0.0556925	5.39686	1	172.5	14.4548	80.7444	138.641	2.79757
2002	06	Jun	2002-06-18	13:02:00	13:00-13:59	37.3629	0.143016	0.041427	3.35145	5	456.3	12.315	42.8747	134.337	3.45223
2002	06	Jun	2002-06-18	13:32:00	13:00-13:59	40.2674	0.166216	0.048967	6.50737	2	243.45	9.67921	64.2201	44.9152	3.39445
2002	06	Jun	2002-06-18	13:35:00	13:00-13:59	25.7806	0.0787602	0.0196594	5.9648	1	172.5	14.9473	160.122	138.464	4.00623
2002	06	Jun	2002-06-19	10:32:00	10:00-10:59	32.825	0.124162	0.0322916	5.22139	5	456.3	8.2599	94.7864	162.006	3.84502
2002	06	Jun	2002-06-19	10:34:00	10:00-10:59	38.6483	0.165436	0.0408645	12.0189	2	243.45	5.45811	123.884	177.967	4.0484
2002	06	Jun	2002-06-19	10:46:00	10:00-10:59	28.8422	0.0818238	0.0284705	5.96134	4	385.35	8.63948	332.665	3.64125	2.87398
2002	06	Jun	2002-06-19	13:47:00	13:00-13:59	39.8586	0.145174	0.0718098	21.2272	1	172.5	4.05462	104.111	82.7487	2.02164
2002	06	Jun	2002-06-20	12:47:00	12:00-12:59	30.8548	0.105647	0.0356782	3.85309	7	598.2	10.3773	57.0693	43.3745	2.96111
2002	06	Jun	2002-06-20	12:49:00	12:00-12:59	37.5042	0.16789	0.0413399	5.94375	1	172.5	12.2812	345.303	161.009	4.06121
2002	06	Jun	2002-06-20	13:19:00	13:00-13:59	41.4436	0.194874	0.0524523	2.82305	6	527.25	13.4806	348.318	10.8679	3.71527
2002	06	Jun	2002-06-20	13:31:00	13:00-13:59	36.0965	0.130571	0.0434409	12.5012	2	243.45	5.06812	281.088	59.5314	3.00571
2002	06	Jun	2002-06-20	13:34:00	13:00-13:59	33.0759	0.118736	0.0295251	16.7817	2	243.45	4.03125	21.9214	91.2335	4.02152
2002	06	Jun	2002-06-20	13:46:00	13:00-13:59	31.1345	0.101184	0.0284256	6.39123	4	385.35	7.90917	261.465	125.422	3.5596
2002	06	Jun	2002-06-20	13:47:00	13:00-13:59	26.1453	0.0691243	0.0284872	6.16623	4	385.35	7.29272	74.8331	132.146	2.4265
2002	06	Jun	2002-06-20	14:01:00	14:00-14:59	26.5108	0.0750739	0.0190803	13.0408	2	243.45	5.29513	342.337	118.165	3.93463
2002	06	Jun	2002-06-20	14:04:00	14:00-14:59	32.4634	0.102448	0.0413805	6.72992	8	669.15	5.73532	253.861	57.7958	2.47576
2002	06	Jun	2002-06-21	11:46:00	11:00-11:59	40.0192	0.172547	0.0440446	2.42979	6	527.25	13.971	12.4229	171.697	3.91755
2002	06	Jun	2002-06-21	12:03:00	12:00-12:59	29.5279	0.0960571	0.023615	4.08248	5	456.3	11.2709	30.7674	97.6043	4.06763
2002	06	Jun	2002-06-21	13:04:00	13:00-13:59	26.8473	0.0782595	0.0206961	4.60066	3	314.4	9.8902	35.4981	107.109	3.78136
2002	06	Jun	2002-06-21	14:17:00	14:00-14:59	33.7509	0.119647	0.0358808	9.09607	2	243.45	7.39222	59.4615	6.18153	3.33457
2002	06	Jun	2002-06-21	14:35:00	14:00-14:59	38.6047	0.151082	0.0473763	6.87789	4	385.35	6.68486	21.7035	154.403	3.18897
2002	06	Jun	2002-06-23	12:01:00	12:00-12:59	35.734	0.138116	0.0364314	5.3719	4	385.35	8.50853	72.7679	174.373	3.79114
2002	06	Jun	2002-06-23	12:04:00	12:00-12:59	37.7495	0.151516	0.0421928	5.42281	2	243.45	11.8332	86.2018	152.584	3.59103
2002	06	Jun	2002-06-23	12:49:00	12:00-12:59	34.1143	0.12221	0.0314656	4.93167	5	456.3	8.41677	64.5321	118.678	3.88392
2002	06	Jun	2002-06-23	13:50:00	13:00-13:59	35.9602	0.128496	0.0506015	6.38037	1	172.5	10.3131	54.6925	129.35	2.53937
2002	06	Jun	2002-06-24	09:31:00	09:00-09:59	26.6153	0.0911655	0.0229321	2.17694	2	243.45	31.6433	103.877	62.4167	3.97546
2002	06	Jun	2002-06-24	10:46:00	10:00-10:59	35.8875	0.136818	0.0347503	2.80554	3	314.4	15.2818	138.104	4.93865	3.93717
2002	06	Jun	2002-06-24	10:50:00	10:00-10:59	40.3376	0.177243	0.0502167	6.94739	1	172.5	10.4854	70.4826	94.5681	3.52957
2002	06	Jun	2002-06-24	10:50:00	10:00-10:59	31.297	0.0929898	0.0513969	2.82853	4	385.35	15.605	68.2471	47.2217	1.80925
2002	06	Jun	2002-06-24	11:05:00	11:00-11:59	40.4882	0.161834	0.0666599	7.11427	3	314.4	5.45406	26.4605	149.316	2.42775
2002	06	Jun	2002-06-24	11:16:00	11:00-11:59	25.3151	0.0629922	0.0223179	4.69617	5	456.3	9.92469	32.4222	43.6184	2.82249
2002	06	Jun	2002-06-24	11:16:00	11:00-11:59	37.598	0.159555	0.0441386	2.56716	8	669.15	13.9303	79.5951	51.1129	3.61486
2002	06	Jun	2002-06-24	11:31:00	11:00-11:59	33.8741	0.10955	0.0418641	3.90761	6	527.25	10.1765	87.105	47.7922	2.61681
2002	06	Jun	2002-06-24	12:03:00	12:00-12:59	30.6512	0.105201	0.0409162	3.25226	5	456.3	13.5724	96.4692	167.108	2.57113
2002	06	Jun	2002-06-24	12:19:00	12:00-12:59	40.6061	0.201381	0.0511562	3.44105	4	385.35	13.5896	110.944	45.2234	3.93659
2002	06	Jun	2002-06-24	14:20:00	14:00-14:59	40.1519	0.165922	0.0488334	5.88749	4	385.35	8.07992	67.8898	154.723	3.39772
2002	06	Jun	2002-06-25	09:34:00	09:00-09:59	36.4532	0.160122	0.0397751	6.38255	7	598.2	5.44768	5.13499	132.501	4.02569
2002	06	Jun	2002-06-26	09:20:00	09:00-09:59	38.5001	0.166294	0.0514948	1.3447	12	952.95	23.9445	28.2932	28.695	3.22934
2002	06	Jun	2002-06-26	09:31:00	09:00-09:59	40.1166	0.18728	0.0463194	4.26062	4	385.35	10.0286	83.8604	114.137	4.04322
2002	06	Jun	2002-06-26	10:03:00	10:00-10:59	28.4336	0.0815498	0.0377635	8.04682	1	172.5	10.1464	41.4192	153.708	2.15949
2002	06	Jun	2002-06-26	10:19:00	10:00-10:59	37.3963	0.132974	0.080499	2.34073	8	669.15	15.0022	37.2324	37.616	1.65187
2002	06	Jun	2002-06-26	11:46:00	11:00-11:59	36.1872	0.126767	0.051012	8.58181	1	172.5	8.98455	59.4089	106.149	2.48505
2002	06	Jun	2002-06-26	11:47:00	11:00-11:59	27.1252	0.076324	0.0266406	5.51496	4	385.35	8.50853	8.21273	161.617	2.86496
2002	06	Jun	2002-06-26	11:47:00	11:00-11:59	25.5253	0.0694006	0.0202198	4.43503	6	527.25	9.97816	94.4253	19.6101	3.43231
2002	06	Jun	2002-06-26	11:47:00	11:00-11:59	30.2869	0.0868251	0.0505659	3.29626	6	527.25	13.0234	33.2543	31.5537	1.71707
2002	06	Jun	2002-06-26	11:50:00	11:00-11:59	41.7918	0.186568	0.0487323	4.47823	6	527.25	7.11364	62.5184	129.096	3.82843
2002	06	Jun	2002-06-26	12:01:00	12:00-12:59	34.8625	0.135682	0.0348596	3.00764	5	456.3	14.0506	33.0256	20.6141	3.89223
2002	06	Jun	2002-06-26	12:03:00	12:00-12:59	32.5238	0.119019	0.038183	3.02887	4	385.35	13.8126	70.7972	93.6971	3.11707
2002	06	Jun	2002-06-26	12:20:00	12:00-12:59	29.0408	0.0817832	0.0307116	8.19175	1	172.5	10.4854	320.917	130.515	2.66295
2002	06	Jun	2002-06-26	12:33:00	12:00-12:59	35.0991	0.120224	0.0500098	4.26837	3	314.4	13.286	253.631	117.528	2.40401
2002	06	Jun	2002-06-26	12:33:00	12:00-12:59	34.6757	0.142905	0.0350495	2.04235	9	740.1	16.0974	106.24	110.581	4.07724
2002	06	Jun	2002-06-26	13:04:00	13:00-13:59	36.5815	0.150626	0.0462257	4.82653	3	314.4	11.2694	46.3567	23.2801	3.2585
2002	06	Jun	2002-06-26	13:34:00	13:00-13:59	33.3248	0.117381	0.0405102	6.9462	1	172.5	12.5893	324.225	65.9658	2.89757
2002	06	Jun	2002-06-26	13:35:00	13:00-13:59	30.4607	0.0983841	0.0244241	6.10008	2	243.45	10.756	68.4517	82.6204	4.02816
2002	06	Jun	2002-06-26	13:48:00	13:00-13:59	31.3338	0.111398	0.0312594	2.87939	6	527.25	14.4985	63.8302	146.507	3.56366
2002	06	Jun	2002-06-26	14:35:00	14:00-14:59	26.5352	0.0822995	0.0305645	3.38235	7	598.2	12.1073	15.8143	122.124	2.69265
2002	06	Jun	2002-06-26	14:47:00	14:00-14:59	25.7175	0.0754292	0.0230234	3.54611	6	527.25	12.393	104.138	150.81	3.2762
2002	06	Jun	2002-06-28	10:48:00	10:00-10:59	35.2317	0.121649	0.0439367	7.44299	3	314.4	6.2761	65.0129	74.8402	2.76874
2002	06	Jun	2002-06-28	10:48:00	10:00-10:59	34.9084	0.115829	0.0451984	5.70129	6	527.25	6.29724	107.205	169.434	2.56269
2002	06	Jun	2002-06-29	11:50:00	11:00-11:59	31.1399	0.0995703	0.030267	4.19828	6	527.25	9.54423	99.9827	156.873	3.28973
2002	07	Jul	2002-07-02	13:20:00	13:00-13:59	25.8171	0.0750243	0.0205009	3.10539	4	385.35	16.524	26.5578	60.5776	3.65956
2002	07	Jul	2002-07-06	13:32:00	13:00-13:59	33.4407	0.104015	0.0428821	31.3929	2	243.45	2.13691	59.9219	131.773	2.42561
2002	07	Jul	2002-07-06	13:49:00	13:00-13:59	31.0114	0.104214	0.0322313	4.06507	6	527.25	9.72549	110.432	113.071	3.23332
2002	07	Jul	2002-07-09	14:50:00	14:00-14:59	37.7037	0.153961	0.038818	4.54375	2	243.45	13.9806	15.4147	97.6136	3.96624
2002	07	Jul	2002-07-10	12:32:00	12:00-12:59	35.5525	0.133248	0.0356348	4.23146	3	314.4	12.9723	354.338	123.527	3.73926
2002	07	Jul	2002-07-10	13:17:00	13:00-13:59	33.3988	0.115319	0.0370288	6.95171	2	243.45	9.50619	18.9398	34.192	3.11429
2002	07	Jul	2002-07-10	13:50:00	13:00-13:59	28.2674	0.0847053	0.02372	3.83134	3	314.4	11.6518	19.8349	7.33964	3.57105
2002	07	Jul	2002-07-11	10:48:00	10:00-10:59	27.1594	0.0790781	0.0365446	5.67	1	172.5	14.2206	27.8449	105.756	2.16388
2002	07	Jul	2002-07-11	11:01:00	11:00-11:59	37.9181	0.167537	0.04318	8.73046	1	172.5	9.67706	345.352	97.956	3.87997
2002	07	Jul	2002-07-11	12:16:00	12:00-12:59	25.1705	0.0629237	0.0203864	2.58262	5	456.3	18.1418	346.07	18.8522	3.08655
2002	07	Jul	2002-07-11	12:18:00	12:00-12:59	30.5864	0.0760148	0.0479685	2.41613	5	456.3	14.89	8.92618	46.1464	1.58468
2002	07	Jul	2002-07-11	12:20:00	12:00-12:59	38.4863	0.156875	0.0434683	4.0473	4	385.35	11.8658	13.2383	70.0432	3.60895
2002	07	Jul	2002-07-11	13:04:00	13:00-13:59	41.6671	0.204658	0.0524773	4.93855	1	172.5	16.6691	14.7026	58.2389	3.89993
2002	07	Jul	2002-07-11	13:05:00	13:00-13:59	30.4459	0.106306	0.0293883	6.41911	1	172.5	13.5615	256.438	118.045	3.61727
2002	07	Jul	2002-07-12	09:49:00	09:00-09:59	33.307	0.13049	0.0401242	6.04496	1	172.5	13.9939	352.255	143.925	3.25215
2002	07	Jul	2002-07-13	09:20:00	09:00-09:59	27.2987	0.0869434	0.0235608	7.31962	1	172.5	9.2493	183.091	58.7823	3.69016
2002	07	Jul	2002-07-13	09:20:00	09:00-09:59	25.1139	0.0679952	0.016738	3.01135	5	456.3	13.0398	161.149	26.3844	4.06231
2002	07	Jul	2002-07-13	09:46:00	09:00-09:59	39.3517	0.1738	0.0636672	4.06872	3	314.4	13.4816	216.919	167.386	2.72982
2002	07	Jul	2002-07-13	09:47:00	09:00-09:59	40.4346	0.208462	0.0530604	4.02448	5	456.3	10.555	219.223	80.9238	3.92877
2002	07	Jul	2002-07-13	09:49:00	09:00-09:59	34.9423	0.142822	0.0349089	4.51912	4	385.35	10.5965	138.828	22.3257	4.09129
2002	07	Jul	2002-07-13	09:50:00	09:00-09:59	32.2867	0.124376	0.0315733	4.28039	4	385.35	11.462	165.914	145.844	3.93928
2002	07	Jul	2002-07-13	10:19:00	10:00-10:59	30.5102	0.108162	0.0287666	2.70633	7	598.2	14.4095	158.127	118.622	3.75998
2002	07	Jul	2002-07-13	10:47:00	10:00-10:59	35.8386	0.106618	0.0640266	4.9913	4	385.35	8.3194	106.625	98.8588	1.66522
2002	07	Jul	2002-07-13	10:49:00	10:00-10:59	36.0204	0.14074	0.0351502	7.2111	5	456.3	6.04444	319.692	59.0381	4.00397
2002	07	Jul	2002-07-13	11:16:00	11:00-11:59	25.9688	0.0708373	0.025012	4.1344	3	314.4	14.3254	127.106	164.644	2.83214
2002	07	Jul	2002-07-13	11:20:00	11:00-11:59	32.2105	0.0969158	0.0513455	4.36794	2	243.45	15.3097	177.604	169.005	1.88752
2002	07	Jul	2002-07-13	11:48:00	11:00-11:59	27.4418	0.0758325	0.0268369	5.27404	6	527.25	7.68281	184.248	45.8015	2.82568
2002	07	Jul	2002-07-13	11:49:00	11:00-11:59	32.1008	0.111458	0.028529	5.85292	3	314.4	9.68112	88.907	74.4086	3.90684
2002	07	Jul	2002-07-13	12:17:00	12:00-12:59	36.8315	0.145541	0.0566923	4.56747	3	314.4	12.061	128.859	113.629	2.56722
2002	07	Jul	2002-07-13	12:47:00	12:00-12:59	31.6758	0.122699	0.0307011	4.67998	6	527.25	8.73065	145.702	136.936	3.99655
2002	07	Jul	2002-07-13	12:48:00	12:00-12:59	29.1014	0.0918771	0.0292974	6.23148	5	456.3	7.38786	162.407	125.917	3.13601
2002	07	Jul	2002-07-13	12:50:00	12:00-12:59	31.8117	0.121864	0.0300446	3.27177	7	598.2	11.3209	142.122	90.6711	4.0561
2002	07	Jul	2002-07-13	13:04:00	13:00-13:59	38.4396	0.18465	0.0501577	2.75128	5	456.3	15.5885	81.452	165.343	3.68139
2002	07	Jul	2002-07-13	13:04:00	13:00-13:59	26.5309	0.0796549	0.021299	3.62821	8	669.15	10.5985	169.101	22.5852	3.73983
2002	07	Jul	2002-07-13	13:17:00	13:00-13:59	31.4305	0.0843515	0.0476169	5.48791	3	314.4	6.73772	173.685	26.6185	1.77146
2002	07	Jul	2002-07-13	13:18:00	13:00-13:59	32.7871	0.10742	0.0435424	3.21582	8	669.15	11.8192	132.795	173.678	2.46702
2002	07	Jul	2002-07-13	13:19:00	13:00-13:59	29.3967	0.0888084	0.0277372	6.70748	7	598.2	6.05301	125.254	84.2822	3.20178
2002	07	Jul	2002-07-13	13:19:00	13:00-13:59	41.7173	0.220724	0.0542765	2.10804	12	952.95	14.4646	77.7995	85.2534	4.06666
2002	07	Jul	2002-07-13	13:46:00	13:00-13:59	38.287	0.14801	0.0698854	5.15515	6	527.25	7.83963	274.67	88.5194	2.11789
2002	07	Jul	2002-07-13	13:47:00	13:00-13:59	39.6486	0.182551	0.0554065	12.1348	1	172.5	6.98549	190.899	101.809	3.29477
2002	07	Jul	2002-07-13	14:17:00	14:00-14:59	27.0177	0.0806431	0.0199663	5.02475	5	456.3	7.73155	161.627	171.916	4.03896
2002	07	Jul	2002-07-13	14:17:00	14:00-14:59	27.4056	0.0830004	0.0378491	2.68956	5	456.3	15.8361	153.697	172.275	2.19293
2002	07	Jul	2002-07-13	14:17:00	14:00-14:59	28.1816	0.088606	0.0255855	3.9136	5	456.3	11.6666	172.239	135.217	3.46313
2002	07	Jul	2002-07-13	14:17:00	14:00-14:59	33.2885	0.114017	0.0358377	3.41742	7	598.2	11.5459	86.9755	134.09	3.18147
2002	07	Jul	2002-07-13	14:33:00	14:00-14:59	34.0688	0.121898	0.0354911	6.87533	2	243.45	9.42198	154.977	26.0567	3.43462
2002	07	Jul	2002-07-13	14:35:00	14:00-14:59	36.1336	0.141292	0.0413593	4.38998	5	456.3	9.49922	189.333	61.49	3.4162
2002	07	Jul	2002-07-13	14:48:00	14:00-14:59	36.0343	0.144752	0.041603	9.92306	3	314.4	5.45406	186.518	79.8475	3.47937
2002	07	Jul	2002-07-14	09:16:00	09:00-09:59	26.3463	0.0762099	0.0235636	8.54743	5	456.3	5.54068	128.072	178.34	3.23422
2002	07	Jul	2002-07-14	09:46:00	09:00-09:59	27.5812	0.0798207	0.0219675	12.6086	3	314.4	4.58127	200.987	47.7536	3.63358
2002	07	Jul	2002-07-14	09:46:00	09:00-09:59	31.9034	0.10898	0.0292444	6.56774	4	385.35	7.24565	338.524	160.271	3.72654
2002	07	Jul	2002-07-14	09:47:00	09:00-09:59	29.526	0.0904754	0.0251675	16.7486	2	243.45	4.03125	234.768	113.705	3.59493
2002	07	Jul	2002-07-14	09:49:00	09:00-09:59	30.2526	0.087719	0.0330914	14.4083	3	314.4	4.01859	224.585	69.956	2.65081
2002	07	Jul	2002-07-14	10:46:00	10:00-10:59	26.3582	0.0812529	0.0209537	4.8948	3	314.4	11.6518	114.662	124.112	3.87774
2002	07	Jul	2002-07-14	10:47:00	10:00-10:59	25.0942	0.0718044	0.0230763	5.8104	5	456.3	8.2089	170.851	2.57267	3.11161
2002	07	Jul	2002-07-14	10:48:00	10:00-10:59	28.1675	0.0882881	0.032079	7.25882	5	456.3	6.3932	137.391	159.235	2.7522
2002	07	Jul	2002-07-14	11:01:00	11:00-11:59	32.4116	0.112369	0.0295707	9.95394	5	456.3	4.55391	147.615	26.9147	3.8
2002	07	Jul	2002-07-14	11:03:00	11:00-11:59	38.6678	0.181648	0.0464551	3.40845	5	456.3	12.5475	156.51	25.7367	3.91018
2002	07	Jul	2002-07-14	11:05:00	11:00-11:59	28.8246	0.0918825	0.0225763	9.59955	5	456.3	4.81793	330.1	67.7506	4.06985
2002	07	Jul	2002-07-14	12:02:00	12:00-12:59	34.3972	0.132285	0.0344669	6.6293	3	314.4	8.4853	32.9219	2.14768	3.83804
2002	07	Jul	2002-07-14	12:03:00	12:00-12:59	33.9402	0.12955	0.0400306	6.04939	4	385.35	8.13849	184.602	155.721	3.23628
2002	07	Jul	2002-07-14	12:03:00	12:00-12:59	28.2134	0.0962182	0.0266752	5.0198	6	527.25	8.35099	114.485	141.594	3.60703
2002	07	Jul	2002-07-14	12:03:00	12:00-12:59	33.9784	0.131247	0.0499481	3.10184	8	669.15	11.3381	141.556	87.6819	2.62768
2002	07	Jul	2002-07-14	12:04:00	12:00-12:59	36.2004	0.132294	0.0415229	10.1152	2	243.45	6.45092	147.465	4.71919	3.18605
2002	07	Jul	2002-07-14	12:17:00	12:00-12:59	28.9505	0.0994341	0.0308151	3.9368	5	456.3	10.9914	204.111	162.313	3.2268
2002	07	Jul	2002-07-14	12:35:00	12:00-12:59	27.6063	0.0907055	0.0223451	6.7492	4	385.35	7.48724	166.241	52.2945	4.0593
2002	07	Jul	2002-07-14	13:02:00	13:00-13:59	34.7746	0.135819	0.0364297	5.99822	3	314.4	9.35163	23.2608	83.3128	3.72826
2002	07	Jul	2002-07-14	13:02:00	13:00-13:59	27.1127	0.082526	0.0209419	5.32103	4	385.35	8.50853	140.99	153.811	3.94072
2002	07	Jul	2002-07-14	13:05:00	13:00-13:59	28.71	0.0967393	0.0274505	3.89142	6	527.25	10.9763	311.47	178.027	3.52413
2002	07	Jul	2002-07-14	13:05:00	13:00-13:59	39.8809	0.206244	0.0605772	2.71518	9	740.1	11.9828	178.654	5.54006	3.40465
2002	07	Jul	2002-07-14	13:20:00	13:00-13:59	36.9862	0.154377	0.0618673	2.63805	10	811.05	12.0594	173.262	17.0851	2.4953
2002	07	Jul	2002-07-14	13:50:00	13:00-13:59	34.8374	0.132318	0.0428882	4.53811	5	456.3	9.63693	85.989	84.5931	3.08518
2002	07	Jul	2002-07-14	14:01:00	14:00-14:59	31.0644	0.102549	0.0508361	2.94708	10	811.05	12.0594	192.645	131.08	2.01725
2002	07	Jul	2002-07-14	14:35:00	14:00-14:59	26.7754	0.0801732	0.0235734	7.74402	3	314.4	7.57328	123.059	76.0687	3.401
2002	07	Jul	2002-07-14	14:46:00	14:00-14:59	32.1989	0.12428	0.0476015	4.4993	7	598.2	8.38136	94.0897	32.098	2.61085
2002	07	Jul	2002-07-14	14:48:00	14:00-14:59	40.2014	0.178418	0.0506083	6.60942	4	385.35	7.24565	241.326	56.3868	3.52546
2002	07	Jul	2002-07-15	09:04:00	09:00-09:59	27.5668	0.0898212	0.0270658	7.34907	6	527.25	4.86233	335.621	168.892	3.31863
2002	07	Jul	2002-07-15	09:05:00	09:00-09:59	35.2062	0.136651	0.0333748	4.41923	4	385.35	9.68259	112.924	110.799	4.09444
2002	07	Jul	2002-07-15	09:31:00	09:00-09:59	36.7179	0.154367	0.0377148	10.0918	2	243.45	6.57044	106.587	25.8781	4.09301
2002	07	Jul	2002-07-15	09:48:00	09:00-09:59	28.8456	0.0847914	0.0338189	7.1651	5	456.3	6.51857	61.9358	40.2624	2.50722
2002	07	Jul	2002-07-15	10:18:00	10:00-10:59	33.4986	0.125175	0.0358119	7.47329	1	172.5	11.6178	106.388	104.303	3.49534
2002	07	Jul	2002-07-15	10:33:00	10:00-10:59	29.1151	0.0991653	0.0245979	3.6857	9	740.1	10.1738	245.286	44.8563	4.03145
2002	07	Jul	2002-07-15	10:34:00	10:00-10:59	29.2991	0.08166	0.0484671	3.94585	8	669.15	10.1568	187.796	165.995	1.68486
2002	07	Jul	2002-07-15	10:47:00	10:00-10:59	34.6496	0.112561	0.048496	18.7375	1	172.5	4.26087	112.486	12.4543	2.32104
2002	07	Jul	2002-07-15	10:48:00	10:00-10:59	37.7356	0.150168	0.0434674	8.62963	2	243.45	7.71383	156.355	39.324	3.45471
2002	07	Jul	2002-07-15	10:48:00	10:00-10:59	25.4654	0.0673058	0.0210417	4.61384	6	527.25	9.72549	286.306	74.7052	3.19869
2002	07	Jul	2002-07-15	10:49:00	10:00-10:59	34.2605	0.112922	0.042659	15.803	2	243.45	4.30005	204.098	47.2985	2.64708
2002	07	Jul	2002-07-15	10:49:00	10:00-10:59	38.8738	0.166019	0.0422155	11.1566	3	314.4	4.40505	171.295	44.6974	3.93266
2002	07	Jul	2002-07-15	11:03:00	11:00-11:59	38.4706	0.151491	0.0468464	5.75887	6	527.25	6.4022	172.838	114.563	3.23379
2002	07	Jul	2002-07-15	11:05:00	11:00-11:59	25.9734	0.0706873	0.0219946	6.4585	2	243.45	6.95714	166.395	27.6765	3.21385
2002	07	Jul	2002-07-15	11:05:00	11:00-11:59	36.8786	0.155415	0.0546962	8.31906	6	527.25	4.60028	285.237	144.382	2.84142
2002	07	Jul	2002-07-15	11:31:00	11:00-11:59	25.8162	0.0733204	0.0194341	13.3559	3	314.4	3.9493	206.505	98.2937	3.77277
2002	07	Jul	2002-07-15	11:34:00	11:00-11:59	38.37	0.190542	0.0543677	2.72863	8	669.15	12.3429	129.961	8.91766	3.5047
2002	07	Jul	2002-07-15	11:47:00	11:00-11:59	38.4811	0.150477	0.0571988	5.47924	1	172.5	14.4548	201.427	21.8456	2.63077
2002	07	Jul	2002-07-15	11:47:00	11:00-11:59	39.1176	0.178937	0.0520577	3.6203	5	456.3	10.555	173.256	133.209	3.43729
2002	07	Jul	2002-07-15	11:48:00	11:00-11:59	33.4594	0.134493	0.0386723	5.69855	6	527.25	6.62299	309.945	39.9115	3.47775
2002	07	Jul	2002-07-15	11:49:00	11:00-11:59	37.8343	0.156871	0.0387643	5.31792	3	314.4	10.4151	209.865	10.5146	4.04678
2002	07	Jul	2002-07-15	12:19:00	12:00-12:59	28.7785	0.0954724	0.0262759	9.01195	4	385.35	5.61512	92.1397	94.0549	3.63345
2002	07	Jul	2002-07-15	12:19:00	12:00-12:59	40.8742	0.173269	0.0504871	4.04766	9	740.1	8.29541	136.427	139.33	3.43193
2002	07	Jul	2002-07-15	12:47:00	12:00-12:59	28.5533	0.0816521	0.0271139	5.01635	5	456.3	7.91567	218.495	83.2868	3.01145
2002	07	Jul	2002-07-15	13:16:00	13:00-13:59	37.5056	0.169192	0.0620078	2.74827	8	669.15	10.8341	155.123	164.588	2.72856
2002	07	Jul	2002-07-15	13:18:00	13:00-13:59	29.8523	0.0947132	0.0242286	10.8648	2	243.45	6.11711	169.773	5.707	3.90915
2002	07	Jul	2002-07-15	13:19:00	13:00-13:59	34.7798	0.129228	0.0334636	9.957	3	314.4	5.2061	195.924	95.1812	3.86176
2002	07	Jul	2002-07-15	13:34:00	13:00-13:59	40.9185	0.181902	0.0481633	10.9232	2	243.45	5.91312	207.116	37.0991	3.77679
2002	07	Jul	2002-07-15	14:02:00	14:00-14:59	40.5898	0.177332	0.0484	9.62387	2	243.45	6.82328	212.345	42.6402	3.66388
2002	07	Jul	2002-07-15	14:19:00	14:00-14:59	41.6652	0.184001	0.0502855	3.32259	7	598.2	11.0342	18.8582	77.0909	3.65913
2002	07	Jul	2002-07-15	14:31:00	14:00-14:59	39.3823	0.163585	0.0445711	4.32639	6	527.25	8.93372	150.366	126.27	3.67021
2002	07	Jul	2002-07-16	13:50:00	13:00-13:59	25.7593	0.0740894	0.0218454	3.91406	6	527.25	10.9763	158.091	1.16936	3.39153
2002	07	Jul	2002-07-16	14:32:00	14:00-14:59	36.8055	0.136291	0.059305	3.73287	6	527.25	10.1765	122.377	72.9591	2.29814
2002	07	Jul	2002-07-18	11:31:00	11:00-11:59	33.813	0.109328	0.0401055	9.98244	3	314.4	5.6561	226.162	58.1438	2.72601
2002	07	Jul	2002-07-18	12:05:00	12:00-12:59	36.0141	0.156154	0.049769	3.82858	7	598.2	9.27313	135.545	108.88	3.13758
2002	07	Jul	2002-07-18	12:48:00	12:00-12:59	38.1645	0.154922	0.0419511	7.62642	5	456.3	5.27682	173.439	136.893	3.69291
2002	07	Jul	2002-07-18	13:02:00	13:00-13:59	29.4761	0.086501	0.0304652	13.5352	2	243.45	4.40691	214.745	90.3664	2.83934
2002	07	Jul	2002-07-18	14:04:00	14:00-14:59	32.9278	0.111657	0.0354093	8.87039	2	243.45	7.60356	226.355	61.4023	3.15333
2002	07	Jul	2002-07-18	14:18:00	14:00-14:59	27.9708	0.0865067	0.0213789	6.56151	4	385.35	7.74549	223.874	81.4248	4.04636
2002	07	Jul	2002-07-19	10:46:00	10:00-10:59	25.9879	0.0616677	0.029274	6.16365	3	314.4	5.94999	287.323	41.4362	2.10657
2002	07	Jul	2002-07-19	11:01:00	11:00-11:59	31.1175	0.109963	0.0268326	8.86808	4	385.35	5.61512	290.558	124.995	4.09812
2002	07	Jul	2002-07-19	11:18:00	11:00-11:59	33.1099	0.11767	0.0394568	13.6405	1	172.5	6.39293	312.274	157.961	2.98224
2002	07	Jul	2002-07-19	11:18:00	11:00-11:59	36.0752	0.117543	0.0538828	5.06986	3	314.4	7.7659	272.378	64.2279	2.18146
2002	07	Jul	2002-07-19	12:16:00	12:00-12:59	31.2252	0.101754	0.0304884	10.613	1	172.5	7.11744	287.067	121.167	3.33747
2002	07	Jul	2002-07-22	13:47:00	13:00-13:59	29.0964	0.0943235	0.0233574	6.94844	1	172.5	10.3131	61.3519	93.1928	4.03827
2002	07	Jul	2002-07-22	14:49:00	14:00-14:59	35.3499	0.165872	0.0415804	4.42022	1	172.5	16.2634	64.4171	119.416	3.9892
2002	07	Jul	2002-07-24	09:19:00	09:00-09:59	34.692	0.127395	0.0400015	7.0105	1	172.5	11.9878	100.66	152.448	3.18476
2002	07	Jul	2002-07-24	10:49:00	10:00-10:59	40.2599	0.178106	0.0439414	6.33776	2	243.45	10.0449	74.3732	73.6185	4.05327
2002	07	Jul	2002-07-25	10:02:00	10:00-10:59	26.8228	0.0821809	0.0220362	4.74061	4	385.35	10.8004	89.6224	90.0381	3.72936
2002	07	Jul	2002-07-25	10:31:00	10:00-10:59	35.9341	0.145366	0.0380267	5.41832	1	172.5	13.5615	49.3119	90.6945	3.82273
2002	07	Jul	2002-07-25	11:31:00	11:00-11:59	38.61	0.152088	0.0443638	8.63513	3	314.4	6.3633	7.48843	138.656	3.4282
2002	07	Jul	2002-07-25	13:04:00	13:00-13:59	40.0013	0.176701	0.044867	6.54699	2	243.45	10.0449	34.8194	152.857	3.93833
2002	07	Jul	2002-07-25	13:47:00	13:00-13:59	38.5158	0.14972	0.0450147	2.20208	6	527.25	16.2353	28.6354	157.594	3.32602
2002	07	Jul	2002-07-26	09:19:00	09:00-09:59	36.2408	0.143351	0.043711	5.61396	6	527.25	6.45601	127.358	27.1291	3.27951
2002	07	Jul	2002-07-26	10:03:00	10:00-10:59	33.9631	0.125348	0.0324622	10.3903	2	243.45	6.45092	16.5439	63.7782	3.86134
2002	07	Jul	2002-07-26	10:04:00	10:00-10:59	28.0227	0.0911088	0.0296306	4.44666	6	527.25	8.35099	173.657	25.0161	3.07482
2002	07	Jul	2002-07-26	11:01:00	11:00-11:59	27.5193	0.0805884	0.0303667	11.5533	2	243.45	6.01338	24.0591	177.064	2.65384
2002	07	Jul	2002-07-26	11:02:00	11:00-11:59	25.8611	0.0698555	0.0186569	9.85599	2	243.45	5.91312	67.0678	116.896	3.74423
2002	07	Jul	2002-07-26	11:03:00	11:00-11:59	25.1372	0.0727276	0.0211344	8.08513	3	314.4	7.04879	340.986	143.117	3.44119
2002	07	Jul	2002-07-26	11:31:00	11:00-11:59	41.1608	0.198376	0.0540205	6.75842	6	527.25	5.73326	317.386	126.487	3.67223
2002	07	Jul	2002-07-26	11:33:00	11:00-11:59	26.7532	0.0683888	0.0392959	8.04407	2	243.45	8.58543	56.6585	98.9237	1.74036
2002	07	Jul	2002-07-26	12:02:00	12:00-12:59	35.2751	0.136824	0.0334234	4.99464	5	456.3	7.73155	45.38	168.476	4.09365
2002	07	Jul	2002-07-26	13:01:00	13:00-13:59	29.6752	0.100507	0.0283512	9.26276	4	385.35	4.67916	109.458	179.608	3.54508
2002	07	Jul	2002-07-26	13:48:00	13:00-13:59	40.8096	0.182135	0.047023	7.34937	2	243.45	7.82735	77.7594	155.108	3.87331
2002	07	Jul	2002-07-26	13:49:00	13:00-13:59	28.6264	0.0886092	0.021824	7.02397	2	243.45	9.50619	21.7263	58.2552	4.06017
2002	07	Jul	2002-07-26	14:35:00	14:00-14:59	34.1709	0.1232	0.0351214	6.62535	3	314.4	7.27264	46.124	104.429	3.50783
2002	07	Jul	2002-07-27	13:03:00	13:00-13:59	38.2842	0.153187	0.0432417	5.68623	2	243.45	11.6389	53.1952	20.023	3.54259
2002	07	Jul	2002-07-27	13:32:00	13:00-13:59	27.0597	0.0813372	0.0240402	18.491	1	172.5	4.65558	4.75076	24.6775	3.38339
2002	07	Jul	2002-07-28	09:17:00	09:00-09:59	31.7445	0.117195	0.03155	14.2789	2	243.45	4.73016	286.295	34.604	3.71458
2002	07	Jul	2002-07-28	09:18:00	09:00-09:59	33.0836	0.12486	0.0456353	8.01628	3	314.4	7.04879	67.0408	170.602	2.73604
2002	07	Jul	2002-07-28	09:48:00	09:00-09:59	27.8192	0.0893467	0.0222303	4.92015	4	385.35	10.4002	219.777	174.94	4.01915
2002	07	Jul	2002-07-28	09:49:00	09:00-09:59	32.8989	0.11565	0.0328934	12.1367	1	172.5	6.98549	153.2	173.662	3.51592
2002	07	Jul	2002-07-28	10:20:00	10:00-10:59	33.81	0.121448	0.0402836	8.60627	4	385.35	5.72973	171.121	11.134	3.01483
2002	07	Jul	2002-07-28	12:50:00	12:00-12:59	31.2131	0.116858	0.0313339	13.5287	3	314.4	4.16474	144.33	135.053	3.72944
2002	07	Jul	2002-07-28	13:01:00	13:00-13:59	26.4624	0.0758186	0.0202304	6.61531	3	314.4	8.4853	72.1064	79.7033	3.74775
2002	07	Jul	2002-07-28	13:04:00	13:00-13:59	28.2189	0.0862824	0.0274275	8.77811	2	243.45	7.82735	261.396	29.4899	3.14584
2002	07	Jul	2002-07-28	13:32:00	13:00-13:59	37.6703	0.174936	0.0624162	8.4922	2	243.45	7.77017	180.094	33.1741	2.80274
2002	07	Jul	2002-07-28	13:33:00	13:00-13:59	28.906	0.0965187	0.0257275	7.70922	5	456.3	5.93649	328.374	95.5424	3.75158
2002	07	Jul	2002-07-28	14:33:00	14:00-14:59	29.8039	0.102689	0.0254873	28.1047	1	172.5	3.12258	119.305	17.1528	4.02903
2002	07	Jul	2002-07-28	14:47:00	14:00-14:59	38.048	0.158993	0.0519192	11.8734	1	172.5	7.11744	135.41	23.5954	3.06231
2002	07	Jul	2002-07-29	09:16:00	09:00-09:59	31.0985	0.10502	0.0307225	7.40603	3	314.4	7.70061	222.316	152.594	3.41835
2002	07	Jul	2002-07-29	09:18:00	09:00-09:59	25.3537	0.0541006	0.0298385	10.966	1	172.5	7.85981	168.679	78.8624	1.81311
2002	07	Jul	2002-07-29	09:19:00	09:00-09:59	31.7459	0.108709	0.0317589	9.22477	1	172.5	9.38762	160.159	27.6385	3.42295
2002	07	Jul	2002-07-29	09:19:00	09:00-09:59	31.9239	0.102994	0.0362515	9.24959	2	243.45	7.39222	180.936	39.5916	2.84109
2002	07	Jul	2002-07-29	09:20:00	09:00-09:59	34.2662	0.122054	0.0423651	8.48646	2	243.45	7.94425	194.468	56.4919	2.88101
2002	07	Jul	2002-07-29	09:34:00	09:00-09:59	26.1851	0.0823835	0.0213393	5.4765	5	456.3	7.07343	189.976	169.231	3.86064
2002	07	Jul	2002-07-29	09:35:00	09:00-09:59	31.1165	0.100014	0.0352252	15.8212	1	172.5	5.54618	201.85	92.643	2.83929
2002	07	Jul	2002-07-29	09:46:00	09:00-09:59	36.3389	0.137287	0.0460646	4.12412	5	456.3	9.92469	211.317	4.6941	2.98031
2002	07	Jul	2002-07-29	09:50:00	09:00-09:59	32.5919	0.115486	0.0504329	4.72446	3	314.4	10.9114	211.547	84.7052	2.2899
2002	07	Jul	2002-07-29	10:04:00	10:00-10:59	32.9778	0.115358	0.0585232	4.16251	7	598.2	9.47475	192.135	139.145	1.97114
2002	07	Jul	2002-07-29	10:20:00	10:00-10:59	28.7931	0.091492	0.0226939	9.43124	1	172.5	8.6742	138.272	128.049	4.03157
2002	07	Jul	2002-07-29	10:46:00	10:00-10:59	33.172	0.123338	0.0302638	4.86196	9	740.1	7.28644	202.767	161.589	4.07545
2002	07	Jul	2002-07-29	11:04:00	11:00-11:59	34.6956	0.157891	0.0451653	3.24316	6	527.25	10.6713	191.22	10.5988	3.49584
2002	07	Jul	2002-07-29	11:04:00	11:00-11:59	31.6403	0.110156	0.0412214	6.36448	6	527.25	6.29724	202.56	28.7575	2.6723
2002	07	Jul	2002-07-29	11:16:00	11:00-11:59	41.978	0.188004	0.051037	3.09213	8	669.15	11.0803	217.152	75.6158	3.68367
2002	07	Jul	2002-07-29	11:18:00	11:00-11:59	39.7415	0.16887	0.0456749	9.42192	2	243.45	6.95714	214.855	35.2279	3.69721
2002	07	Jul	2002-07-29	11:35:00	11:00-11:59	38.3964	0.161841	0.0575906	4.19192	7	598.2	8.89457	166.555	123.917	2.81019
2002	07	Jul	2002-07-29	12:01:00	12:00-12:59	25.1322	0.0568528	0.0292045	7.63481	2	243.45	9.33925	182.481	121.804	1.94671
2002	07	Jul	2002-07-29	12:01:00	12:00-12:59	35.7796	0.141752	0.0451682	3.83048	6	527.25	9.31281	128.122	91.1188	3.13831
2002	07	Jul	2002-07-29	12:18:00	12:00-12:59	29.8164	0.0903811	0.0293796	11.3974	1	172.5	7.67958	240.311	86.5893	3.07632
2002	07	Jul	2002-07-29	12:47:00	12:00-12:59	33.1585	0.129164	0.0342178	7.35757	3	314.4	7.63641	164.563	130.376	3.77475
2002	07	Jul	2002-07-29	12:49:00	12:00-12:59	25.9794	0.0783757	0.029951	3.56806	5	456.3	13.0398	214.777	159.381	2.6168
2002	07	Jul	2002-07-29	12:50:00	12:00-12:59	32.6997	0.108992	0.0378007	7.92217	2	243.45	6.57044	218.731	24.6253	2.88332
2002	07	Jul	2002-07-29	13:01:00	13:00-13:59	32.1267	0.0989833	0.0468716	5.40865	5	456.3	8.41677	255.737	12.0314	2.1118
2002	07	Jul	2002-07-29	13:05:00	13:00-13:59	40.1016	0.175977	0.045969	3.21109	3	314.4	11.2694	240.899	56.389	3.82816
2002	07	Jul	2002-07-29	13:32:00	13:00-13:59	25.122	0.0683402	0.0177627	5.16608	2	243.45	13.4499	237.793	50.8106	3.84739
2002	07	Jul	2002-07-29	14:04:00	14:00-14:59	30.5145	0.108012	0.0529704	3.28449	9	740.1	11.2338	194.562	13.8059	2.03911
2002	07	Jul	2002-07-29	14:46:00	14:00-14:59	29.7749	0.0769152	0.0388945	7.93038	2	243.45	8.58543	272.323	106.648	1.97754
2002	07	Jul	2002-07-30	09:18:00	09:00-09:59	25.847	0.0729569	0.0190569	11.6747	2	243.45	6.01338	122.887	28.6643	3.82836
2002	07	Jul	2002-07-30	09:18:00	09:00-09:59	28.4671	0.089373	0.022088	6.6201	8	669.15	5.87353	41.9967	57.2571	4.04623
2002	07	Jul	2002-07-30	10:04:00	10:00-10:59	31.2348	0.103695	0.0285363	25.6229	1	172.5	3.32942	84.8535	103.509	3.63381
2002	07	Jul	2002-07-30	11:16:00	11:00-11:59	38.8958	0.149932	0.0488968	12.326	2	243.45	5.06812	161.401	36.4864	3.06629
2002	07	Jul	2002-07-30	11:50:00	11:00-11:59	31.735	0.105407	0.0336418	10.4246	1	172.5	8.3846	96.5647	178.743	3.13321
2002	08	Aug	2002-08-02	12:19:00	12:00-12:59	28.0337	0.0858204	0.0227568	4.351	4	385.35	8.50853	217.111	22.4819	3.77119
2002	08	Aug	2002-08-04	13:47:00	13:00-13:59	37.4135	0.14955	0.0398245	8.43784	4	385.35	5.61512	184.474	125.442	3.75522
2002	08	Aug	2002-08-07	09:49:00	09:00-09:59	25.3043	0.06735	0.0184909	10.5806	5	456.3	4.40311	248.082	69.4249	3.64233
2002	08	Aug	2002-08-07	10:03:00	10:00-10:59	35.6655	0.149067	0.0429336	4.44072	5	456.3	9.56758	118.891	120.175	3.47203
2002	08	Aug	2002-08-07	11:05:00	11:00-11:59	27.536	0.0830807	0.0336918	5.4835	5	456.3	8.05962	296.171	121.405	2.4659
2002	08	Aug	2002-08-07	13:01:00	13:00-13:59	36.1737	0.154001	0.038959	4.10618	6	527.25	9.4853	62.2569	56.0701	3.95291
2002	08	Aug	2002-08-07	13:20:00	13:00-13:59	26.8826	0.0774996	0.0195256	8.5644	2	243.45	7.4964	66.5423	60.9172	3.96912
2002	08	Aug	2002-08-07	13:33:00	13:00-13:59	30.4777	0.0966539	0.0282167	10.3396	2	243.45	6.33567	84.377	103.492	3.42542
2002	08	Aug	2002-08-07	13:33:00	13:00-13:59	38.7293	0.174468	0.0702398	3.29842	9	740.1	10.1738	87.9714	77.7821	2.48389
2002	08	Aug	2002-08-07	14:04:00	14:00-14:59	37.1539	0.14992	0.0768787	4.02409	8	669.15	9.02815	173.178	127.18	1.95009
2002	08	Aug	2002-08-10	12:31:00	12:00-12:59	36.6001	0.138633	0.0385975	8.33366	3	314.4	6.68852	166.63	139.821	3.59176
2002	08	Aug	2002-08-10	12:35:00	12:00-12:59	40.3416	0.182338	0.0516033	9.71605	1	172.5	8.6742	136.534	133.804	3.53346
2002	08	Aug	2002-08-11	11:32:00	11:00-11:59	25.789	0.0715186	0.0192596	3.59733	3	314.4	14.3254	34.4742	69.0443	3.7134
2002	08	Aug	2002-08-11	12:04:00	12:00-12:59	28.3569	0.0837089	0.0226609	3.35915	7	598.2	12.1073	33.1028	15.1192	3.69398
2002	08	Aug	2002-08-12	13:02:00	13:00-13:59	29.1506	0.0876133	0.0264621	4.98969	5	456.3	9.29988	43.1179	25.8624	3.31089
2002	08	Aug	2002-08-13	13:48:00	13:00-13:59	34.089	0.120005	0.0377153	5.25299	3	314.4	9.35163	58.4895	11.0716	3.18187
2002	08	Aug	2002-08-13	14:01:00	14:00-14:59	30.1762	0.0959447	0.028781	5.538	1	172.5	13.5615	81.5666	18.6985	3.33361
2002	08	Aug	2002-08-14	11:18:00	11:00-11:59	38.7617	0.152564	0.0474529	2.87375	4	385.35	12.7654	350.012	129.378	3.21507
2002	08	Aug	2002-08-14	11:31:00	11:00-11:59	39.4982	0.142547	0.0668356	10.6633	1	172.5	7.50743	324.293	75.4666	2.1328
2002	08	Aug	2002-08-14	12:02:00	12:00-12:59	25.6366	0.0692137	0.0191485	13.2965	2	243.45	3.69526	163.092	168.731	3.61457
2002	08	Aug	2002-08-14	12:48:00	12:00-12:59	33.1364	0.117567	0.0300144	8.61583	2	243.45	7.60356	311.403	90.2717	3.91701
2002	08	Aug	2002-08-14	12:49:00	12:00-12:59	30.1162	0.0953967	0.0272846	12.1618	1	172.5	6.39293	12.8184	96.3849	3.49636
2002	08	Aug	2002-08-14	13:31:00	13:00-13:59	26.3164	0.0745909	0.0182239	5.46561	5	456.3	8.63544	297.023	136.524	4.09303
2002	08	Aug	2002-08-15	09:01:00	09:00-09:59	34.1034	0.130554	0.0344519	6.41333	1	172.5	11.5289	327.188	125.065	3.78945
2002	08	Aug	2002-08-15	09:48:00	09:00-09:59	31.8988	0.1131	0.0316382	9.11077	3	314.4	6.19127	251.361	64.3079	3.5748
2002	08	Aug	2002-08-15	10:20:00	10:00-10:59	38.8778	0.15205	0.0724793	10.0421	2	243.45	5.25589	216.07	23.3426	2.09784
2002	08	Aug	2002-08-16	09:32:00	09:00-09:59	25.1604	0.0647962	0.0366611	3.94538	6	527.25	11.4679	216.099	2.06927	1.76744
2002	08	Aug	2002-08-16	10:32:00	10:00-10:59	33.0327	0.109796	0.0392137	6.96425	2	243.45	9.33925	210.532	12.3184	2.79994
2002	08	Aug	2002-08-16	11:05:00	11:00-11:59	41.4016	0.17511	0.0532343	6.98907	2	243.45	9.33925	203.349	26.5249	3.28942
2002	08	Aug	2002-08-16	11:20:00	11:00-11:59	32.5459	0.12341	0.0367637	5.4665	2	243.45	10.5953	226.983	55.3457	3.35685
2002	08	Aug	2002-08-16	12:47:00	12:00-12:59	40.6366	0.166835	0.0517979	7.93042	5	456.3	4.88879	174.802	172.476	3.22088
2002	08	Aug	2002-08-16	13:20:00	13:00-13:59	31.1175	0.0933705	0.0345476	7.88915	6	527.25	5.33509	201.69	27.8691	2.70266
2002	08	Aug	2002-08-16	14:03:00	14:00-14:59	38.8843	0.168399	0.0471503	8.66363	1	172.5	8.98455	121.932	100.029	3.57155
2002	08	Aug	2002-08-16	14:03:00	14:00-14:59	36.2909	0.15263	0.0491666	4.99371	4	385.35	9.05767	187.573	150.464	3.10435
2002	08	Aug	2002-08-17	11:04:00	11:00-11:59	25.3426	0.0671772	0.0199176	13.6444	2	243.45	5.1416	326.812	20.0617	3.37275
2002	08	Aug	2002-08-17	11:34:00	11:00-11:59	32.7594	0.116758	0.0301272	3.59299	6	527.25	11.6417	41.6873	40.0014	3.8755
2002	08	Aug	2002-08-17	12:35:00	12:00-12:59	33.0825	0.118865	0.0302494	3.25241	4	385.35	14.7828	317.197	88.0945	3.92949
2002	08	Aug	2002-08-17	12:47:00	12:00-12:59	28.0342	0.0705774	0.0368712	4.75839	1	172.5	17.7344	313.751	144.415	1.91416
2002	08	Aug	2002-08-18	09:49:00	09:00-09:59	27.8179	0.0913693	0.0244121	4.4623	5	456.3	9.56758	41.7105	144.958	3.74279
2002	08	Aug	2002-08-18	13:02:00	13:00-13:59	40.474	0.183416	0.0474553	18.2213	1	172.5	4.65558	4.09505	29.3014	3.86503
2002	08	Aug	2002-08-18	14:35:00	14:00-14:59	25.4133	0.0697116	0.0188889	12.6946	3	314.4	4.67478	36.2955	93.8014	3.6906
2002	08	Aug	2002-08-20	12:20:00	12:00-12:59	31.5526	0.119085	0.030433	3.98838	3	314.4	8.64548	194.638	57.4782	3.91301
2002	08	Aug	2002-08-21	09:16:00	09:00-09:59	25.6726	0.0686587	0.0201618	7.45692	1	172.5	9.98495	156.25	90.8406	3.40538
2002	08	Aug	2002-08-21	10:01:00	10:00-10:59	36.6098	0.144222	0.0451793	16.3703	1	172.5	5.02823	172.041	71.4519	3.19222
2002	08	Aug	2002-08-21	12:34:00	12:00-12:59	32.2396	0.106988	0.0344201	5.49112	5	456.3	8.2599	299.513	28.5448	3.10829
2002	08	Aug	2002-08-22	12:05:00	12:00-12:59	27.3127	0.0792741	0.0217112	6.72637	8	669.15	6.01857	43.643	94.773	3.65131
2002	08	Aug	2002-08-22	13:16:00	13:00-13:59	25.3945	0.0584053	0.0316416	9.29599	6	527.25	4.86233	125.444	165.066	1.84584
2002	08	Aug	2002-08-22	13:34:00	13:00-13:59	41.1311	0.185122	0.0487451	6.41163	6	527.25	5.262	7.68899	92.8583	3.79775
2002	08	Aug	2002-08-24	10:16:00	10:00-10:59	39.7119	0.189911	0.0519814	5.91366	3	314.4	6.2334	184.924	45.4191	3.65344
2002	08	Aug	2002-08-24	10:46:00	10:00-10:59	28.2181	0.080607	0.0277131	8.38488	3	314.4	6.83831	140.795	155.004	2.90862
2002	08	Aug	2002-08-24	11:31:00	11:00-11:59	29.1868	0.0865273	0.0260128	8.44271	6	527.25	5.08775	143.095	22.2308	3.32633
2002	08	Aug	2002-08-24	11:35:00	11:00-11:59	30.7276	0.104021	0.0258309	3.90324	8	669.15	8.55293	141.195	173.837	4.027
2002	08	Aug	2002-08-24	11:49:00	11:00-11:59	28.5039	0.0872904	0.0229728	4.8953	7	598.2	8.38136	45.0336	130.733	3.79974
2002	08	Aug	2002-08-24	13:48:00	13:00-13:59	31.1451	0.10387	0.0260614	6.96398	6	527.25	6.04929	117.875	131.344	3.98557
2002	08	Aug	2002-08-29	09:32:00	09:00-09:59	35.4306	0.135694	0.0447926	4.93684	1	172.5	13.7743	60.0279	51.3664	3.0294
2002	08	Aug	2002-08-31	10:33:00	10:00-10:59	32.4788	0.111898	0.0323245	2.91719	5	456.3	13.8553	125.253	65.1401	3.46172
2002	08	Aug	2002-08-31	11:32:00	11:00-11:59	29.5661	0.0959787	0.0244475	3.17048	6	527.25	11.1354	112.124	51.6051	3.92592
2002	08	Aug	2002-08-31	11:47:00	11:00-11:59	37.2068	0.152188	0.0379785	4.10356	5	456.3	9.63693	117.526	170.009	4.00723
2002	09	Sep	2002-09-01	11:02:00	11:00-11:59	36.8971	0.14267	0.0396322	5.63677	4	385.35	8.02219	237.51	69.0816	3.59986
2002	09	Sep	2002-09-01	11:20:00	11:00-11:59	30.0655	0.0928618	0.0269705	3.87835	6	527.25	10.9763	283.614	51.6153	3.44309
2002	09	Sep	2002-09-01	11:46:00	11:00-11:59	33.7302	0.121003	0.0312712	6.32609	7	598.2	6.18181	61.1852	8.2056	3.86947
2002	09	Sep	2002-09-01	12:04:00	12:00-12:59	36.2203	0.135892	0.0408464	18.8779	3	314.4	2.67898	282.827	14.8488	3.3269
2002	09	Sep	2002-09-01	12:04:00	12:00-12:59	35.4337	0.136163	0.0379088	6.78917	4	385.35	7.10805	249.472	85.6069	3.59187
2002	09	Sep	2002-09-01	12:05:00	12:00-12:59	27.7224	0.0816193	0.0226402	4.94367	4	385.35	8.02219	221.298	69.8164	3.60505
2002	09	Sep	2002-09-01	12:18:00	12:00-12:59	37.9177	0.159997	0.0400632	11.2831	2	243.45	5.86423	226.273	100.362	3.99361
2002	09	Sep	2002-09-01	12:31:00	12:00-12:59	32.0017	0.109226	0.0294692	6.47134	5	456.3	6.92605	209.007	29.3019	3.70645
2002	09	Sep	2002-09-01	12:32:00	12:00-12:59	25.4694	0.0666871	0.0249152	3.75661	9	740.1	10.3695	199.02	58.6158	2.67656
2002	09	Sep	2002-09-01	12:34:00	12:00-12:59	41.2095	0.178543	0.0468206	6.94996	3	314.4	7.89985	237.813	82.0535	3.81335
2002	09	Sep	2002-09-01	13:05:00	13:00-13:59	27.0602	0.0736016	0.0234734	5.25193	7	598.2	8.0709	201.855	51.7663	3.13553
2002	09	Sep	2002-09-01	13:17:00	13:00-13:59	34.1592	0.126912	0.030997	4.59393	8	669.15	7.99203	278.389	29.6085	4.09434
2002	09	Sep	2002-09-01	13:31:00	13:00-13:59	36.2165	0.137567	0.0413067	4.84812	4	385.35	8.3815	213.32	14.2221	3.33038
2002	09	Sep	2002-09-01	13:35:00	13:00-13:59	28.0985	0.0900016	0.0246691	5.38389	1	172.5	12.5893	225.323	22.0652	3.64835
2002	09	Sep	2002-09-01	13:47:00	13:00-13:59	33.8148	0.116951	0.0383156	4.1271	3	314.4	10.0347	232.548	16.2893	3.05232
2002	09	Sep	2002-09-02	10:19:00	10:00-10:59	34.5287	0.122544	0.0363611	2.62291	5	456.3	15.1157	228.714	109.59	3.37019
2002	09	Sep	2002-09-02	10:47:00	10:00-10:59	37.5493	0.15406	0.0394371	3.91298	6	527.25	10.3131	140.274	22.4903	3.90648
2002	09	Sep	2002-09-02	11:02:00	11:00-11:59	28.3776	0.0847879	0.025304	4.57471	4	385.35	11.2326	248.114	58.8808	3.35077
2002	09	Sep	2002-09-02	11:03:00	11:00-11:59	28.4943	0.0817543	0.0279818	5.56478	4	385.35	8.91384	235.386	154.884	2.9217
2002	09	Sep	2002-09-02	11:03:00	11:00-11:59	29.2058	0.0875124	0.0249428	2.96469	7	598.2	13.2083	268.53	75.7768	3.50852
2002	09	Sep	2002-09-02	11:04:00	11:00-11:59	30.9379	0.100112	0.0270275	3.10717	7	598.2	12.8197	240.375	81.6585	3.70408
2002	09	Sep	2002-09-02	11:16:00	11:00-11:59	27.5199	0.0763647	0.0246976	2.80984	6	527.25	15.6827	322.293	52.9248	3.09199
2002	09	Sep	2002-09-02	11:31:00	11:00-11:59	38.2179	0.149283	0.047124	2.3559	5	456.3	16.0917	263.337	76.2951	3.16788
2002	09	Sep	2002-09-02	11:47:00	11:00-11:59	38.1048	0.159638	0.0396457	5.37108	2	243.45	12.2419	242.163	81.1967	4.02661
2002	09	Sep	2002-09-02	11:49:00	11:00-11:59	36.6281	0.140486	0.0413672	2.76994	4	385.35	14.2812	267.709	90.0611	3.39606
2002	09	Sep	2002-09-02	12:16:00	12:00-12:59	29.9415	0.0984163	0.0254945	3.5897	3	314.4	14.7881	266.055	95.5706	3.8603
2002	09	Sep	2002-09-02	12:16:00	12:00-12:59	28.4969	0.0844142	0.0273459	2.87816	4	385.35	15.8997	220.487	14.7107	3.08691
2002	09	Sep	2002-09-02	12:33:00	12:00-12:59	37.5582	0.130053	0.056604	3.86317	2	243.45	16.6533	294.636	37.0858	2.2976
2002	09	Sep	2002-09-02	12:49:00	12:00-12:59	25.8009	0.0767509	0.0201748	11.6196	1	172.5	7.50743	255.522	77.1298	3.8043
2002	09	Sep	2002-09-02	13:46:00	13:00-13:59	29.8148	0.0936004	0.0252876	3.44576	5	456.3	12.315	248.62	51.2782	3.70144
2002	09	Sep	2002-09-03	10:47:00	10:00-10:59	35.1803	0.124181	0.037849	5.90934	3	314.4	9.35163	231.067	118.155	3.28094
2002	09	Sep	2002-09-03	10:47:00	10:00-10:59	39.5645	0.171536	0.045678	5.9788	5	456.3	7.07343	244.204	42.3897	3.75533
2002	09	Sep	2002-09-03	10:48:00	10:00-10:59	35.5676	0.135362	0.0343013	7.67228	2	243.45	8.58543	253.075	2.40623	3.94627
2002	09	Sep	2002-09-03	12:49:00	12:00-12:59	40.8722	0.167559	0.0699687	7.59259	1	172.5	10.1464	212.186	44.7444	2.39478
2002	09	Sep	2002-09-03	13:47:00	13:00-13:59	29.2032	0.0931733	0.0239718	8.63985	2	243.45	6.33567	201.09	11.7217	3.88679
2002	09	Sep	2002-09-03	14:18:00	14:00-14:59	26.103	0.0715206	0.01998	2.55669	8	669.15	13.0014	192.653	9.47493	3.57961
2002	09	Sep	2002-09-03	14:34:00	14:00-14:59	38.7879	0.162562	0.041874	6.97078	2	243.45	9.50619	247.317	28.5789	3.88217
2002	09	Sep	2002-09-04	11:49:00	11:00-11:59	34.8646	0.144386	0.0355625	10.3741	1	172.5	6.39293	152.369	70.4442	4.06005
2002	09	Sep	2002-09-04	13:04:00	13:00-13:59	33.0611	0.113167	0.0310013	12.0563	4	385.35	3.55372	69.5839	70.1688	3.6504
2002	09	Sep	2002-09-04	13:05:00	13:00-13:59	33.9757	0.129788	0.033783	31.1489	1	172.5	2.79291	270.688	63.3492	3.84182
2002	09	Sep	2002-09-04	13:50:00	13:00-13:59	27.5396	0.0822543	0.0223678	17.3015	1	172.5	4.92958	82.5855	101.249	3.67735
2002	09	Sep	2002-09-04	14:16:00	14:00-14:59	32.1441	0.10289	0.0349058	23.7268	2	243.45	2.86076	20.7187	10.7503	2.94765
2002	09	Sep	2002-09-04	14:17:00	14:00-14:59	34.8007	0.127847	0.0382048	10.8291	2	243.45	4.7941	43.968	57.8182	3.34637
2002	09	Sep	2002-09-05	12:01:00	12:00-12:59	37.3491	0.152175	0.0447319	7.08001	1	172.5	10.8479	51.6933	97.3122	3.40192
2002	09	Sep	2002-09-06	14:03:00	14:00-14:59	31.8347	0.0940116	0.0409945	2.51684	4	385.35	17.5581	28.5476	119.109	2.29327
2002	09	Sep	2002-09-07	12:49:00	12:00-12:59	35.8667	0.134635	0.0378336	4.07086	5	456.3	9.36539	333.621	79.0062	3.55862
2002	09	Sep	2002-09-08	11:01:00	11:00-11:59	41.5532	0.185234	0.0476743	7.34391	4	385.35	5.10459	125.321	65.2323	3.88539
2002	09	Sep	2002-09-08	11:01:00	11:00-11:59	32.0221	0.108536	0.0274504	4.17153	7	598.2	9.27313	352.271	38.9559	3.95388
2002	09	Sep	2002-09-08	11:17:00	11:00-11:59	38.7723	0.153909	0.0516857	4.00221	4	385.35	9.43839	341.075	92.3609	2.97778
2002	09	Sep	2002-09-08	11:17:00	11:00-11:59	41.7168	0.193229	0.0480542	3.36803	4	385.35	10.8004	317.735	111.152	4.02106
2002	09	Sep	2002-09-08	11:49:00	11:00-11:59	26.2009	0.0730088	0.0189869	9.7676	5	456.3	4.71541	203.307	127.481	3.84521
2002	09	Sep	2002-09-08	11:50:00	11:00-11:59	40.019	0.177535	0.0442661	12.4226	4	385.35	3.69401	341.432	49.9784	4.01063
2002	09	Sep	2002-09-08	11:50:00	11:00-11:59	41.0057	0.182558	0.0487489	2.28795	5	456.3	13.3008	355.619	122.96	3.74488
2002	09	Sep	2002-09-08	12:18:00	12:00-12:59	32.9332	0.113849	0.0289653	10.8474	3	314.4	5.2061	325.593	72.0491	3.93054
2002	09	Sep	2002-09-08	12:20:00	12:00-12:59	36.0589	0.140103	0.0357396	4.28384	7	598.2	7.26372	225.194	135.341	3.92012
2002	09	Sep	2002-09-08	12:31:00	12:00-12:59	31.1932	0.0966819	0.038861	15.1048	1	172.5	4.65558	284.578	66.3319	2.48789
2002	09	Sep	2002-09-08	13:16:00	13:00-13:59	27.288	0.0757111	0.0237619	11.1231	1	172.5	7.11744	350.548	130.396	3.18624
2002	09	Sep	2002-09-08	13:32:00	13:00-13:59	28.7188	0.0788234	0.0301132	8.83677	2	243.45	7.24127	310.374	74.9186	2.61757
2002	09	Sep	2002-09-10	10:50:00	10:00-10:59	30.43	0.0972561	0.0265503	6.66684	3	314.4	8.4853	56.9072	79.4734	3.66309
2002	09	Sep	2002-09-10	11:20:00	11:00-11:59	35.4556	0.141422	0.0355365	8.73847	2	243.45	7.60356	41.514	62.2526	3.97962
2002	09	Sep	2002-09-10	11:31:00	11:00-11:59	31.7773	0.109511	0.0273175	10.1304	5	456.3	4.40311	258.906	166.471	4.00884
2002	09	Sep	2002-09-10	11:47:00	11:00-11:59	35.0855	0.132861	0.033336	7.51878	3	314.4	5.32719	61.1145	26.6164	3.9855
2002	09	Sep	2002-09-10	12:01:00	12:00-12:59	30.787	0.0999236	0.028673	5.04593	3	314.4	8.9847	41.6675	42.731	3.48493
2002	09	Sep	2002-09-10	12:16:00	12:00-12:59	32.3532	0.107074	0.0328283	9.31294	5	456.3	4.55391	338.337	105.241	3.26164
2002	09	Sep	2002-09-10	12:48:00	12:00-12:59	28.4781	0.0716548	0.0401736	9.27535	1	172.5	7.62132	50.6292	74.2276	1.78363
2002	09	Sep	2002-09-10	12:49:00	12:00-12:59	27.1991	0.0785241	0.0203627	5.26623	5	456.3	7.91567	50.1951	97.6502	3.85628
2002	09	Sep	2002-09-10	13:34:00	13:00-13:59	37.9433	0.155201	0.0422004	8.61635	4	385.35	5.61512	54.2452	64.7675	3.67771
2002	09	Sep	2002-09-10	13:35:00	13:00-13:59	35.127	0.140445	0.0359886	5.25119	9	740.1	6.69806	256.313	123.164	3.90249
2002	09	Sep	2002-09-10	13:47:00	13:00-13:59	37.981	0.151888	0.0441569	7.69768	4	385.35	6.23912	36.1868	58.4125	3.43973
2002	09	Sep	2002-09-10	13:49:00	13:00-13:59	28.1316	0.0835341	0.0212333	4.85179	5	456.3	8.57971	24.981	28.8795	3.9341
2002	09	Sep	2002-09-10	14:46:00	14:00-14:59	33.2044	0.112602	0.0338721	5.47303	3	314.4	10.0347	83.0764	105.979	3.32433
2002	09	Sep	2002-09-11	09:19:00	09:00-09:59	29.778	0.0933654	0.0274934	13.1611	2	243.45	5.21723	276.493	148.404	3.39592
2002	09	Sep	2002-09-11	09:32:00	09:00-09:59	30.817	0.102872	0.0256528	5.39939	6	527.25	7.83963	165.172	14.6709	4.01017
2002	09	Sep	2002-09-11	09:47:00	09:00-09:59	29.7584	0.0760594	0.0392852	16.1948	2	243.45	4.22325	223.045	51.0309	1.93608
2002	09	Sep	2002-09-11	09:47:00	09:00-09:59	30.0654	0.0936381	0.0281814	7.78662	4	385.35	6.52937	197.748	66.4641	3.32269
2002	09	Sep	2002-09-11	09:50:00	09:00-09:59	28.6071	0.0895586	0.0227998	6.83669	4	385.35	6.84794	206.387	94.5845	3.92805
2002	09	Sep	2002-09-11	10:02:00	10:00-10:59	32.835	0.120065	0.0303727	12.2487	1	172.5	7.11744	165.875	78.2325	3.95307
2002	09	Sep	2002-09-11	10:02:00	10:00-10:59	34.8302	0.131929	0.0329072	5.43781	3	314.4	9.54657	186.48	52.6594	4.00914
2002	09	Sep	2002-09-11	10:05:00	10:00-10:59	33.8364	0.125725	0.0323165	27.2999	1	172.5	3.04686	144.189	48.7356	3.89044
2002	09	Sep	2002-09-11	10:05:00	10:00-10:59	27.6844	0.077158	0.0251381	5.23806	6	527.25	8.17328	194.284	44.7005	3.06937
2002	09	Sep	2002-09-11	10:19:00	10:00-10:59	27.9934	0.0777703	0.0254246	4.9185	7	598.2	8.38136	209.456	75.1525	3.05886
2002	09	Sep	2002-09-11	10:33:00	10:00-10:59	29.8673	0.0882091	0.0292422	9.19379	6	527.25	4.71317	18.546	80.6617	3.0165
2002	09	Sep	2002-09-11	10:33:00	10:00-10:59	30.6951	0.0977194	0.0353075	3.6905	8	669.15	10.373	211.234	38.3654	2.76767
2002	09	Sep	2002-09-11	10:47:00	10:00-10:59	28.6525	0.0851662	0.0271318	8.03644	2	243.45	7.24127	191.745	23.964	3.13898
2002	09	Sep	2002-09-11	10:47:00	10:00-10:59	32.164	0.111013	0.030229	4.18573	5	456.3	9.36539	170.823	8.45149	3.67239
2002	09	Sep	2002-09-11	11:01:00	11:00-11:59	29.7708	0.093906	0.023861	6.55769	2	243.45	9.67921	184.62	18.6824	3.93553
2002	09	Sep	2002-09-11	11:02:00	11:00-11:59	31.0656	0.104426	0.0261879	4.41869	6	527.25	8.73065	198.344	44.8786	3.98755
2002	09	Sep	2002-09-11	11:03:00	11:00-11:59	30.2721	0.0891675	0.0316693	9.15021	2	243.45	7.19231	207.294	69.8067	2.81559
2002	09	Sep	2002-09-11	11:04:00	11:00-11:59	27.0269	0.079253	0.0197775	4.45053	7	598.2	8.71666	191.212	36.9822	4.00723
2002	09	Sep	2002-09-11	11:05:00	11:00-11:59	29.7357	0.0921777	0.0285716	2.62709	6	527.25	12.4938	194.148	16.7624	3.2262
2002	09	Sep	2002-09-11	11:18:00	11:00-11:59	27.4852	0.0803375	0.0208112	4.12608	8	669.15	9.55929	200.3	34.2023	3.86029
2002	09	Sep	2002-09-11	11:33:00	11:00-11:59	32.7396	0.114685	0.0316043	4.72716	4	385.35	10.211	154.478	175.245	3.62877
2002	09	Sep	2002-09-11	11:33:00	11:00-11:59	34.756	0.122154	0.0515752	5.47808	6	527.25	7.53215	187.478	26.9003	2.36847
2002	09	Sep	2002-09-11	12:03:00	12:00-12:59	31.7102	0.105446	0.0308492	6.29455	3	314.4	8.64548	185.053	69.7604	3.41813
2002	09	Sep	2002-09-11	12:04:00	12:00-12:59	36.4115	0.150827	0.0394719	4.65767	4	385.35	9.85253	193.966	169.039	3.82112
2002	09	Sep	2002-09-11	12:18:00	12:00-12:59	26.656	0.0758324	0.0234788	8.02703	1	172.5	10.065	150.994	148.064	3.22983
2002	09	Sep	2002-09-11	12:19:00	12:00-12:59	34.8133	0.130199	0.0353605	5.34845	5	456.3	7.5558	193.888	82.1401	3.68205
2002	09	Sep	2002-09-11	12:32:00	12:00-12:59	28.9467	0.0888317	0.0255298	5.20914	5	456.3	8.80705	174.478	160.663	3.47954
2002	09	Sep	2002-09-11	12:34:00	12:00-12:59	38.054	0.160741	0.0410536	6.25129	4	385.35	7.29272	185.346	83.2698	3.91538
2002	09	Sep	2002-09-11	12:47:00	12:00-12:59	31.9392	0.104013	0.034097	5.26577	5	456.3	8.63544	258.909	67.097	3.05051
2002	09	Sep	2002-09-11	12:49:00	12:00-12:59	31.2574	0.0966573	0.0323325	3.58522	7	598.2	11.3209	190.334	61.7604	2.98948
2002	09	Sep	2002-09-12	12:19:00	12:00-12:59	29.3076	0.0807568	0.0324083	11.2993	1	172.5	6.08333	255.348	55.222	2.49186
2002	09	Sep	2002-09-12	12:48:00	12:00-12:59	26.7886	0.0735744	0.021995	3.46297	6	527.25	12.4938	212.859	12.8162	3.34505
2002	09	Sep	2002-09-12	13:05:00	13:00-13:59	28.2183	0.0832073	0.0291905	6.26992	1	172.5	10.3131	219.063	106.036	2.85049
2002	09	Sep	2002-09-12	13:17:00	13:00-13:59	37.1643	0.144852	0.0434359	8.17011	2	243.45	7.6583	238.176	158.79	3.33486
2002	09	Sep	2002-09-12	13:19:00	13:00-13:59	32.001	0.10718	0.0303066	7.37163	2	243.45	9.17807	201.15	155.61	3.53654
2002	09	Sep	2002-09-13	10:04:00	10:00-10:59	39.7472	0.166514	0.0455969	4.2272	3	314.4	12.7318	252.392	32.2353	3.65188
2002	09	Sep	2002-09-13	11:17:00	11:00-11:59	34.0455	0.123446	0.0307608	2.08782	7	598.2	18.164	300.2	45.8602	4.01311
2002	09	Sep	2002-09-13	11:20:00	11:00-11:59	38.3642	0.149982	0.0464499	1.87269	6	527.25	16.2353	248.135	76.5714	3.22889
2002	09	Sep	2002-09-13	11:35:00	11:00-11:59	25.8456	0.0683374	0.0212093	3.88798	6	527.25	11.4679	178.699	80.5117	3.22205
2002	09	Sep	2002-09-13	11:49:00	11:00-11:59	38.8754	0.152975	0.0502955	5.70713	2	243.45	11.6389	199.864	9.67275	3.04152
2002	09	Sep	2002-09-13	12:32:00	12:00-12:59	31.3434	0.106865	0.0284128	5.88908	1	172.5	14.4548	246.088	82.4677	3.76115
2002	09	Sep	2002-09-13	12:32:00	12:00-12:59	40.6592	0.256695	0.0818099	3.67643	4	385.35	12.5747	186.207	25.6729	3.13771
2002	09	Sep	2002-09-13	12:35:00	12:00-12:59	26.7053	0.0813655	0.022277	6.88613	1	172.5	12.2812	226.023	28.9393	3.65244
2002	09	Sep	2002-09-13	12:50:00	12:00-12:59	40.2023	0.152472	0.058626	3.14827	7	598.2	11.9414	326.024	154.371	2.60076
2002	09	Sep	2002-09-13	13:17:00	13:00-13:59	34.9957	0.118979	0.0516155	7.17381	1	172.5	11.9878	210.024	167.861	2.30509
2002	09	Sep	2002-09-16	11:32:00	11:00-11:59	34.3847	0.119992	0.0347834	13.8996	3	314.4	4.01859	298.803	42.9034	3.4497
2002	09	Sep	2002-09-16	11:46:00	11:00-11:59	31.0876	0.104016	0.0306224	5.76275	1	172.5	14.9473	148.002	127.652	3.39672
2002	09	Sep	2002-09-16	11:46:00	11:00-11:59	38.4845	0.160063	0.0436838	8.98146	2	243.45	7.34121	126.261	88.2637	3.66413
2002	09	Sep	2002-09-16	11:46:00	11:00-11:59	36.9753	0.14993	0.0370911	4.27046	4	385.35	11.2326	201.238	37.5725	4.0422
2002	09	Sep	2002-09-16	13:16:00	13:00-13:59	31.3258	0.105119	0.0304611	4.10215	5	456.3	11.083	182.633	166.922	3.45094
2002	09	Sep	2002-09-17	11:03:00	11:00-11:59	34.5404	0.129605	0.0322286	3.09066	5	456.3	12.091	204.596	74.3661	4.02142
2002	09	Sep	2002-09-18	11:04:00	11:00-11:59	40.3168	0.179876	0.0450842	4.30776	4	385.35	8.91384	199.346	160.18	3.98977
2002	09	Sep	2002-09-18	11:20:00	11:00-11:59	31.4789	0.104009	0.0292159	3.1274	7	598.2	11.78	196.029	46.6292	3.56001
2002	09	Sep	2002-09-18	12:46:00	12:00-12:59	37.7964	0.147713	0.0412758	5.37615	3	314.4	10.2595	258.505	47.4721	3.57867
2002	09	Sep	2002-09-18	13:01:00	13:00-13:59	30.1692	0.0891944	0.0323675	7.29063	3	314.4	6.83831	191.136	140.958	2.75568
2002	09	Sep	2002-09-19	12:05:00	12:00-12:59	29.1435	0.0954266	0.0249837	11.6483	1	172.5	6.85834	224.637	31.8059	3.81955
2002	09	Sep	2002-09-20	11:05:00	11:00-11:59	34.1041	0.145096	0.0359427	16.2144	1	172.5	4.65558	227.498	1.46456	4.03686
2002	09	Sep	2002-09-20	12:31:00	12:00-12:59	26.2875	0.0730141	0.0206951	15.2523	1	172.5	5.71437	285.807	147.191	3.52809
2002	09	Sep	2002-09-21	10:31:00	10:00-10:59	40.1345	0.154725	0.0626263	8.01931	1	172.5	9.53014	192.357	48.5339	2.47061
2002	09	Sep	2002-09-21	11:03:00	11:00-11:59	40.3887	0.176417	0.0449804	6.98082	1	172.5	11.5289	153.331	136.322	3.92208
2002	09	Sep	2002-09-23	14:17:00	14:00-14:59	30.8717	0.102337	0.0308714	6.60052	1	172.5	13.3552	317.549	9.20565	3.31494
2002	09	Sep	2002-09-23	14:33:00	14:00-14:59	30.3806	0.0893339	0.0347142	4.58063	2	243.45	12.6799	223.211	94.7238	2.57341
2002	09	Sep	2002-09-24	12:01:00	12:00-12:59	36.2296	0.146945	0.0382802	2.32862	6	527.25	16.7062	152.946	71.5667	3.83866
2002	09	Sep	2002-09-27	14:31:00	14:00-14:59	36.6092	0.130185	0.0455912	18.1344	1	172.5	4.74346	184.359	43.8651	2.85549
2002	09	Sep	2002-09-28	11:46:00	11:00-11:59	33.5758	0.112893	0.0406162	6.0833	5	456.3	7.07343	334.715	138.889	2.77952
2002	09	Sep	2002-09-28	12:16:00	12:00-12:59	26.5091	0.0788656	0.0197142	6.24286	2	243.45	9.02237	18.0682	34.2972	4.00045
2002	09	Sep	2002-09-28	13:18:00	13:00-13:59	37.8663	0.148715	0.0431299	10.9014	1	172.5	7.45175	23.4519	54.2758	3.44808
2002	09	Sep	2002-09-28	13:18:00	13:00-13:59	38.7853	0.163786	0.0400548	6.15779	2	243.45	10.756	206.947	17.7508	4.08905
2002	09	Sep	2002-09-28	14:31:00	14:00-14:59	29.8899	0.0937999	0.0307422	13.8547	2	243.45	4.3797	69.3959	110.075	3.05118
2002	09	Sep	2002-09-29	10:48:00	10:00-10:59	26.0318	0.0620414	0.027194	20.5753	1	172.5	3.1033	324.248	72.7724	2.28143
2002	09	Sep	2002-09-29	12:34:00	12:00-12:59	32.2229	0.111843	0.0287893	7.98266	2	243.45	8.31692	313.105	132.065	3.88487
2002	09	Sep	2002-09-30	10:31:00	10:00-10:59	40.9888	0.178931	0.0541529	10.6867	1	172.5	7.62132	232.979	51.1494	3.30418
2002	09	Sep	2002-09-30	11:02:00	11:00-11:59	32.1182	0.104473	0.036829	13.1375	1	172.5	6.39293	283.562	19.5638	2.8367
2002	09	Sep	2002-09-30	12:03:00	12:00-12:59	25.4568	0.0694389	0.0187406	4.63241	3	314.4	11.8529	265.383	160.818	3.70527
2002	10	Oct	2002-10-01	11:34:00	11:00-11:59	36.9309	0.137882	0.0504159	3.73889	4	385.35	12.8629	336.234	84.3	2.73489
2002	10	Oct	2002-10-01	14:47:00	14:00-14:59	35.883	0.154255	0.0377168	7.80487	1	172.5	9.1482	299.932	113.016	4.08983
2002	10	Oct	2002-10-06	12:04:00	12:00-12:59	33.3664	0.118255	0.0355745	8.55703	1	172.5	10.1464	244.484	58.9241	3.32416
2002	10	Oct	2002-10-07	11:19:00	11:00-11:59	32.6817	0.11872	0.0314879	16.0001	1	172.5	5.46574	26.5894	100.353	3.77034
2002	10	Oct	2002-10-07	11:50:00	11:00-11:59	31.7802	0.105832	0.0306314	20.1791	1	172.5	3.86742	7.33357	8.7988	3.45502
2002	10	Oct	2002-10-07	13:32:00	13:00-13:59	35.7874	0.138013	0.0386702	21.9674	1	172.5	3.64315	162.345	23.3322	3.56898
2002	10	Oct	2002-10-08	12:05:00	12:00-12:59	25.1847	0.0539449	0.0299117	6.51357	1	172.5	13.2544	286.958	69.7798	1.80347
2002	10	Oct	2002-10-08	12:19:00	12:00-12:59	30.9786	0.10136	0.0286963	8.75943	1	172.5	9.38762	328.291	84.3484	3.53215
2002	10	Oct	2002-10-09	12:04:00	12:00-12:59	30.6188	0.103747	0.0264615	4.17494	1	172.5	20.3632	241.942	81.6442	3.92067
2002	10	Oct	2002-10-10	14:05:00	14:00-14:59	31.5405	0.106109	0.031587	14.8942	1	172.5	5.62902	259	152.171	3.35928
2002	10	Oct	2002-10-24	12:01:00	12:00-12:59	27.5496	0.0924688	0.026325	5.47165	2	243.45	11.0926	325.427	105.905	3.51258
2003	05	May	2003-05-04	10:31:00	10:00-10:59	26.6565	0.0624501	0.0338188	6.72949	1	172.5	12.9133	348.842	3.79784	1.84661
2003	05	May	2003-05-04	11:49:00	11:00-11:59	40.8027	0.151535	0.0735086	2.39642	4	385.35	19.5462	349.424	142.402	2.06147
2003	05	May	2003-05-04	12:17:00	12:00-12:59	39.572	0.146169	0.0620952	3.35338	2	243.45	14.3196	350.924	82.8288	2.35395
2003	05	May	2003-05-06	12:49:00	12:00-12:59	27.3815	0.0787698	0.0225521	9.76127	1	172.5	9.1482	151.54	148.72	3.49279
2003	05	May	2003-05-24	11:20:00	11:00-11:59	39.8377	0.155377	0.0559703	7.51587	2	243.45	8.18887	40.0724	33.4652	2.77607
2003	05	May	2003-05-26	09:05:00	09:00-09:59	37.3416	0.14915	0.0426662	3.69637	6	527.25	10.5251	3.18748	174.768	3.49574
2003	05	May	2003-05-26	09:49:00	09:00-09:59	37.6316	0.154361	0.0407572	5.44814	2	243.45	12.0341	335.865	148.658	3.78735
2003	05	May	2003-05-26	12:32:00	12:00-12:59	29.5281	0.0940803	0.0249754	4.98198	4	385.35	10.211	356.583	47.9232	3.76692
2003	05	May	2003-05-28	09:03:00	09:00-09:59	28.1416	0.0729444	0.0321773	4.50769	1	172.5	17.7344	99.6598	48.2016	2.26695
2003	05	May	2003-05-28	09:04:00	09:00-09:59	29.8561	0.0983356	0.0278489	16.4652	4	385.35	3.00259	159.997	112.001	3.53104
2003	05	May	2003-05-28	10:50:00	10:00-10:59	28.9095	0.0915714	0.0228952	10.4843	5	456.3	3.84315	276.105	26.5634	3.99959
2003	05	May	2003-05-28	11:02:00	11:00-11:59	32.8598	0.11786	0.0296278	7.85647	5	456.3	5.6346	267.986	93.5051	3.97803
2003	05	May	2003-05-28	12:01:00	12:00-12:59	35.5995	0.128325	0.0395011	24.3394	2	243.45	2.72871	210.794	50.8894	3.24864
2003	05	May	2003-05-28	13:31:00	13:00-13:59	38.883	0.15831	0.0425341	12.5884	3	314.4	4.40505	326.702	141.02	3.72196
2003	05	May	2003-05-28	13:33:00	13:00-13:59	38.1767	0.119254	0.0689188	11.0514	3	314.4	4.87374	158.743	13.4279	1.73036
2003	05	May	2003-05-28	13:48:00	13:00-13:59	26.1085	0.0722869	0.0203953	7.5531	4	385.35	6.76542	315.598	38.2491	3.54429
2003	05	May	2003-05-29	11:46:00	11:00-11:59	39.2405	0.15433	0.0510359	7.38826	4	385.35	6.38095	268.111	48.0818	3.02396
2003	05	May	2003-05-29	12:31:00	12:00-12:59	32.0645	0.111151	0.029522	5.01156	8	669.15	6.54371	241.044	121.832	3.76503
2003	05	May	2003-05-29	13:02:00	13:00-13:59	35.5934	0.136609	0.0371973	3.97483	2	243.45	12.0341	273.778	45.4923	3.67256
2003	05	May	2003-05-30	09:31:00	09:00-09:59	39.9531	0.168782	0.0442435	10.0371	2	243.45	6.57044	248.161	38.3321	3.81485
2003	05	May	2003-05-30	11:20:00	11:00-11:59	33.376	0.11705	0.0295932	11.1038	2	243.45	5.91312	168.374	134.089	3.95528
2003	05	May	2003-05-30	11:20:00	11:00-11:59	38.9908	0.158537	0.0450067	9.20446	3	314.4	5.72682	232.471	32.1063	3.52251
2003	05	May	2003-05-30	11:49:00	11:00-11:59	34.0518	0.124779	0.0351965	8.64132	2	243.45	6.11711	295.995	152.591	3.5452
2003	05	May	2003-05-30	11:49:00	11:00-11:59	33.4102	0.14116	0.0358693	4.23924	10	811.05	8.15018	123.89	94.3394	3.9354
2003	05	May	2003-05-30	13:47:00	13:00-13:59	36.5756	0.146078	0.0382716	4.85271	9	740.1	6.26968	150.808	131.939	3.81687
2003	05	May	2003-05-31	10:03:00	10:00-10:59	32.3524	0.10701	0.0328848	4.88716	5	456.3	9.23528	291.387	11.8797	3.25408
2003	05	May	2003-05-31	10:35:00	10:00-10:59	28.861	0.0958355	0.0378717	2.8939	5	456.3	14.6708	308.883	155.749	2.53053
2003	06	Jun	2003-06-02	14:47:00	14:00-14:59	35.0228	0.126087	0.0351172	5.58255	3	314.4	10.1085	356.261	52.2825	3.59046
2003	06	Jun	2003-06-05	11:50:00	11:00-11:59	39.2632	0.162401	0.0458174	7.37403	3	314.4	6.73772	28.9927	3.58016	3.54452
2003	06	Jun	2003-06-07	10:02:00	10:00-10:59	32.9865	0.112372	0.0344288	5.09105	3	314.4	10.8254	32.0735	31.5833	3.26389
2003	06	Jun	2003-06-07	12:48:00	12:00-12:59	39.8374	0.164319	0.0464223	5.72736	2	243.45	11.0926	27.359	133.304	3.53966
2003	06	Jun	2003-06-07	13:16:00	13:00-13:59	33.1287	0.11196	0.0342156	5.94036	2	243.45	9.33925	2.15708	117.719	3.2722
2003	06	Jun	2003-06-07	14:01:00	14:00-14:59	33.9523	0.120881	0.0303855	9.59113	1	172.5	7.85981	352.895	77.9119	3.97825
2003	06	Jun	2003-06-07	14:18:00	14:00-14:59	29.2268	0.0851623	0.0297282	6.586	1	172.5	11.7082	17.1913	61.8562	2.86469
2003	06	Jun	2003-06-08	12:32:00	12:00-12:59	41.4198	0.181377	0.0485291	3.15409	5	456.3	12.7889	11.0348	74.7495	3.73748
2003	06	Jun	2003-06-09	13:01:00	13:00-13:59	40.2608	0.17375	0.0436847	4.903	6	527.25	8.00298	0.762399	56.6314	3.97737
2003	06	Jun	2003-06-10	12:19:00	12:00-12:59	33.8416	0.137599	0.0370911	4.76058	1	172.5	13.7743	325.397	120.898	3.70975
2003	06	Jun	2003-06-10	13:02:00	13:00-13:59	27.6239	0.0834033	0.0217244	4.49085	2	243.45	15.3097	11.0189	32.6749	3.83915
2003	06	Jun	2003-06-10	13:34:00	13:00-13:59	28.2414	0.0871754	0.0318377	2.519	2	243.45	23.3312	7.76179	149.194	2.73812
2003	06	Jun	2003-06-10	14:20:00	14:00-14:59	31.003	0.0952436	0.0316036	3.16115	4	385.35	14.5277	10.772	150.871	3.0137
2003	06	Jun	2003-06-10	14:46:00	14:00-14:59	38.0273	0.153506	0.0430124	2.40601	5	456.3	17.5046	15.4011	122.013	3.56887
2003	06	Jun	2003-06-12	10:46:00	10:00-10:59	35.6276	0.132176	0.0396744	4.90963	4	385.35	9.51841	32.9306	36.8011	3.33151
2003	06	Jun	2003-06-12	11:05:00	11:00-11:59	39.4253	0.167043	0.043395	6.88023	2	243.45	9.50619	64.2674	147.326	3.84935
2003	06	Jun	2003-06-12	12:17:00	12:00-12:59	29.2429	0.0931457	0.0244852	6.3988	4	385.35	7.58844	62.4809	104.091	3.80416
2003	06	Jun	2003-06-12	14:20:00	14:00-14:59	30.9169	0.104797	0.0274804	4.26164	3	314.4	12.061	77.804	118.105	3.81351
2003	06	Jun	2003-06-13	10:18:00	10:00-10:59	34.8764	0.133494	0.0341976	8.08751	5	456.3	5.44984	138.486	176.855	3.90359
2003	06	Jun	2003-06-13	10:48:00	10:00-10:59	29.5265	0.0950532	0.024364	8.14755	2	243.45	7.24127	147.934	164.904	3.90138
2003	06	Jun	2003-06-13	11:35:00	11:00-11:59	25.3889	0.0697219	0.018593	7.78005	1	172.5	8.6742	102.471	146.468	3.7499
2003	06	Jun	2003-06-13	12:05:00	12:00-12:59	38.0049	0.147714	0.0427792	25.4775	2	243.45	2.41312	113.366	30.5595	3.45294
2003	06	Jun	2003-06-13	12:35:00	12:00-12:59	41.4843	0.182274	0.0467639	8.88389	2	243.45	6.69447	122.081	127.891	3.89774
2003	06	Jun	2003-06-13	13:03:00	13:00-13:59	31.5097	0.0802602	0.0489426	9.90881	2	243.45	6.95714	260.076	121.711	1.63989
2003	06	Jun	2003-06-13	14:19:00	14:00-14:59	36.1351	0.135989	0.0398291	7.51686	6	527.25	4.86233	97.6676	136.522	3.4143
2003	06	Jun	2003-06-14	09:05:00	09:00-09:59	28.5518	0.0804203	0.0278755	6.10185	5	456.3	7.5558	256.902	100.234	2.88498
2003	06	Jun	2003-06-14	09:49:00	09:00-09:59	36.2138	0.140763	0.0529502	4.84961	4	385.35	9.85253	240.587	59.5805	2.65841
2003	06	Jun	2003-06-14	10:03:00	10:00-10:59	27.1486	0.0658485	0.0314707	7.82188	4	385.35	6.68486	209.402	8.19615	2.09238
2003	06	Jun	2003-06-14	10:17:00	10:00-10:59	35.0586	0.131063	0.0338843	4.59976	5	456.3	9.23528	245.379	74.2693	3.86795
2003	06	Jun	2003-06-14	10:35:00	10:00-10:59	33.9864	0.123948	0.0387669	2.70699	3	314.4	16.6736	252.309	32.0829	3.19726
2003	06	Jun	2003-06-14	10:47:00	10:00-10:59	25.8825	0.068808	0.0230626	2.77174	6	527.25	13.971	247.521	82.9409	2.98353
2003	06	Jun	2003-06-14	10:50:00	10:00-10:59	41.5438	0.172479	0.061932	5.95831	4	385.35	7.90917	269.143	105.931	2.78497
2003	06	Jun	2003-06-14	11:01:00	11:00-11:59	33.298	0.121648	0.031509	6.19598	2	243.45	10.9217	235.028	85.268	3.86073
2003	06	Jun	2003-06-14	11:01:00	11:00-11:59	32.0501	0.0940219	0.0418199	5.95566	4	385.35	7.79929	242.742	50.0014	2.24826
2003	06	Jun	2003-06-14	11:04:00	11:00-11:59	34.9647	0.126648	0.0436426	5.89581	2	243.45	10.9217	265.039	42.8155	2.90193
2003	06	Jun	2003-06-14	11:50:00	11:00-11:59	26.1628	0.0821669	0.0208614	7.44692	1	172.5	9.31794	227.264	59.2887	3.9387
2003	06	Jun	2003-06-14	13:02:00	13:00-13:59	40.2944	0.157347	0.0564557	13.3971	2	243.45	4.96177	128.398	168.105	2.78708
2003	06	Jun	2003-06-14	13:17:00	13:00-13:59	28.2128	0.0937672	0.0266984	3.52412	4	385.35	10.5965	266.606	140.007	3.51209
2003	06	Jun	2003-06-14	13:33:00	13:00-13:59	27.697	0.082703	0.0229208	6.81398	4	385.35	7.1992	200.473	151.173	3.60821
2003	06	Jun	2003-06-14	13:34:00	13:00-13:59	39.9351	0.152028	0.0565557	3.67403	6	527.25	10.3828	242.449	42.2829	2.6881
2003	06	Jun	2003-06-14	14:01:00	14:00-14:59	32.9191	0.0950196	0.0465099	3.52292	7	598.2	10.3773	237.352	56.2551	2.043
2003	06	Jun	2003-06-14	14:02:00	14:00-14:59	33.1668	0.116021	0.0317607	7.09003	2	243.45	9.50619	243.155	26.3609	3.65297
2003	06	Jun	2003-06-15	09:46:00	09:00-09:59	35.5311	0.125453	0.0430589	9.67925	6	527.25	4.13034	151.893	166.04	2.91353
2003	06	Jun	2003-06-15	09:49:00	09:00-09:59	26.6944	0.0804121	0.02025	6.46915	5	456.3	7.22723	262.391	84.7936	3.97097
2003	06	Jun	2003-06-15	10:02:00	10:00-10:59	34.869	0.144426	0.0353612	32.6883	1	172.5	2.61833	88.4866	97.0569	4.0843
2003	06	Jun	2003-06-15	10:04:00	10:00-10:59	26.3631	0.0736137	0.0194557	5.39737	5	456.3	8.74909	332.54	174.916	3.78366
2003	06	Jun	2003-06-15	10:18:00	10:00-10:59	30.9402	0.0965816	0.0306701	9.87275	4	385.35	4.60245	325.655	121.553	3.14905
2003	06	Jun	2003-06-15	10:19:00	10:00-10:59	27.9294	0.0768521	0.0291379	4.15104	2	243.45	12.0341	1.31697	16.5855	2.63753
2003	06	Jun	2003-06-15	10:35:00	10:00-10:59	36.0784	0.141418	0.034522	23.3278	2	243.45	2.86076	169.854	130.868	4.09645
2003	06	Jun	2003-06-15	12:46:00	12:00-12:59	38.2221	0.152085	0.0461814	9.04479	1	172.5	8.82664	155.356	169.588	3.2932
2003	06	Jun	2003-06-15	13:03:00	13:00-13:59	28.1662	0.074784	0.0287971	3.86373	5	456.3	11.6666	62.0162	47.6776	2.59693
2003	06	Jun	2003-06-15	13:18:00	13:00-13:59	26.0679	0.0706884	0.0220641	9.00572	3	314.4	6.0283	79.0552	70.3719	3.20378
2003	06	Jun	2003-06-15	13:32:00	13:00-13:59	30.1036	0.0972942	0.0371378	11.025	4	385.35	4.60245	55.9102	160.937	2.61982
2003	06	Jun	2003-06-15	13:34:00	13:00-13:59	30.1375	0.0828446	0.0383003	6.18194	8	669.15	6.41455	250.68	135.458	2.16303
2003	06	Jun	2003-06-16	10:31:00	10:00-10:59	37.9176	0.171361	0.0444964	3.06946	6	527.25	12.0056	8.45225	176.532	3.85112
2003	06	Jun	2003-06-16	12:34:00	12:00-12:59	29.744	0.0923595	0.028673	11.3896	2	243.45	5.37538	31.5676	42.2778	3.22113
2003	06	Jun	2003-06-16	13:35:00	13:00-13:59	30.7361	0.113459	0.0291664	10.3639	2	243.45	6.45092	214.573	111.15	3.89005
2003	06	Jun	2003-06-17	09:01:00	09:00-09:59	29.886	0.091478	0.0317265	11.6092	2	243.45	4.99672	330.28	171.462	2.88333
2003	06	Jun	2003-06-17	11:17:00	11:00-11:59	33.9947	0.12774	0.0317926	10.1554	3	314.4	5.09039	308.205	131.222	4.0179
2003	06	Jun	2003-06-17	12:34:00	12:00-12:59	30.3846	0.0929344	0.0298779	7.26602	3	314.4	6.3194	145.759	142.459	3.11047
2003	06	Jun	2003-06-17	13:35:00	13:00-13:59	25.2466	0.0683511	0.020686	6.17768	4	385.35	8.13849	45.1741	15.9605	3.30422
2003	06	Jun	2003-06-20	13:19:00	13:00-13:59	41.1269	0.170594	0.055348	11.1059	2	243.45	5.91312	266.415	44.9803	3.0822
2003	06	Jun	2003-06-20	14:48:00	14:00-14:59	38.8908	0.142644	0.05669	5.81807	5	456.3	7.5558	154.373	147.987	2.51621
2003	06	Jun	2003-06-21	11:01:00	11:00-11:59	41.6911	0.185309	0.0472336	14.7962	2	243.45	4.35283	315.772	122.982	3.92324
2003	06	Jun	2003-06-21	11:02:00	11:00-11:59	29.1852	0.0925284	0.0226497	12.6382	3	314.4	4.58127	354.358	115.74	4.0852
2003	06	Jun	2003-06-21	12:19:00	12:00-12:59	26.3826	0.0740771	0.0186645	5.19614	5	456.3	8.31154	285.693	93.2306	3.96887
2003	06	Jun	2003-06-22	09:47:00	09:00-09:59	35.7699	0.159558	0.0448513	1.29795	7	598.2	29.0763	344.262	126.199	3.5575
2003	06	Jun	2003-06-22	10:32:00	10:00-10:59	35.2433	0.135058	0.0344851	30.1124	1	172.5	2.51358	69.8251	138.572	3.9164
2003	06	Jun	2003-06-22	11:02:00	11:00-11:59	32.7938	0.126599	0.0545928	1.51158	9	740.1	23.7955	32.1858	85.4664	2.31898
2003	06	Jun	2003-06-22	11:32:00	11:00-11:59	30.2138	0.0989123	0.0377304	1.35926	7	598.2	26.4294	323.242	1.62449	2.62156
2003	06	Jun	2003-06-22	11:47:00	11:00-11:59	39.0123	0.161668	0.0457459	7.90925	2	243.45	8.31692	324.464	129.244	3.53405
2003	06	Jun	2003-06-22	12:32:00	12:00-12:59	41.82	0.189279	0.0489387	4.60247	2	243.45	14.0918	342.062	106.448	3.86767
2003	06	Jun	2003-06-23	09:17:00	09:00-09:59	40.1754	0.174618	0.0447895	5.18449	2	243.45	12.6799	87.7437	143.799	3.89864
2003	06	Jun	2003-06-23	11:04:00	11:00-11:59	40.208	0.166022	0.0513479	5.68753	2	243.45	11.6389	139.902	4.94043	3.23327
2003	06	Jun	2003-06-24	13:33:00	13:00-13:59	40.5492	0.175063	0.0503646	18.7452	1	172.5	4.26087	95.465	157.355	3.4759
2003	06	Jun	2003-06-24	14:05:00	14:00-14:59	29.2044	0.0792238	0.0316582	10.9249	1	172.5	7.98475	112.521	103.22	2.50247
2003	06	Jun	2003-06-25	10:32:00	10:00-10:59	30.2008	0.104033	0.0266165	1.46388	4	385.35	30.5311	133.657	48.2872	3.90859
2003	06	Jun	2003-06-25	14:35:00	14:00-14:59	30.443	0.113454	0.0362917	2.28842	9	740.1	14.5743	305.051	159.27	3.12618
2003	06	Jun	2003-06-26	09:31:00	09:00-09:59	37.4412	0.157135	0.0734612	1.96559	9	740.1	17.3961	241.61	35.0619	2.13902
2003	06	Jun	2003-06-26	13:34:00	13:00-13:59	34.5315	0.121573	0.0401378	6.86362	4	385.35	7.1992	225.151	56.9161	3.0289
2003	06	Jun	2003-06-26	14:47:00	14:00-14:59	29.3103	0.0958789	0.0235929	4.17107	4	385.35	9.28232	228.315	164.563	4.06389
2003	06	Jun	2003-06-27	10:19:00	10:00-10:59	41.4847	0.190471	0.0512424	2.924	10	811.05	9.09066	161.053	28.7542	3.71706
2003	06	Jun	2003-06-27	11:02:00	11:00-11:59	38.9259	0.166315	0.04141	9.23703	1	172.5	8.11372	116.767	136.048	4.01631
2003	06	Jun	2003-06-27	12:02:00	12:00-12:59	27.4186	0.0674939	0.0317531	8.83903	3	314.4	5.45406	38.411	55.3465	2.12558
2003	06	Jun	2003-06-27	12:17:00	12:00-12:59	31.8808	0.106411	0.0292709	8.77643	3	314.4	6.0283	44.9684	52.6073	3.63537
2003	06	Jun	2003-06-28	13:48:00	13:00-13:59	37.6196	0.141856	0.0467306	12.0145	4	385.35	4.03952	216.703	128.986	3.0356
2003	06	Jun	2003-06-28	13:48:00	13:00-13:59	37.407	0.137493	0.0476628	9.3881	4	385.35	5.10459	12.5494	126.449	2.88469
2003	06	Jun	2003-06-28	14:49:00	14:00-14:59	34.8125	0.1285	0.0335797	12.6314	3	314.4	4.32192	49.5261	79.3384	3.82671
2003	06	Jun	2003-06-29	09:02:00	09:00-09:59	30.8728	0.106253	0.0339038	6.49371	4	385.35	7.74549	226.329	35.4566	3.13397
2003	06	Jun	2003-06-29	09:35:00	09:00-09:59	37.3633	0.168108	0.0436228	3.51475	9	740.1	9.4598	211.429	36.0149	3.85367
2003	06	Jun	2003-06-29	09:47:00	09:00-09:59	36.9846	0.163523	0.0418398	3.86536	7	598.2	8.38136	199.664	1.84057	3.90833
2003	06	Jun	2003-06-29	09:50:00	09:00-09:59	25.0823	0.0654359	0.0178143	6.57259	5	456.3	6.64896	268.898	66.1345	3.67322
2003	06	Jun	2003-06-29	11:03:00	11:00-11:59	31.9369	0.106092	0.0315673	6.70291	7	598.2	5.81088	288.554	31.2859	3.3608
2003	06	Jun	2003-06-29	11:20:00	11:00-11:59	38.6922	0.144786	0.0545179	8.16311	2	243.45	8.18887	281.807	174.816	2.65575
2003	06	Jun	2003-06-29	11:20:00	11:00-11:59	25.1626	0.0711201	0.0281885	4.12121	6	527.25	10.4534	233.724	51.4249	2.52302
[truncated: 6,936 more rows]
